# Supplementary material
Source: publisher figshare collection journal article supplement (https://gsajournals.figshare.com/ndownloader/files/26568782)
Supplement: Supplementary file 1 [file 26568782]

## Sheet: E.genes-vs-nr.blast
Supplementary Table 2. Blast results of genes unique to G. stocksii
# code to generate: singularity exec -B/work/datasets/igbb/blast/2021-01-31/ -B`pwd` /apps/singularity-3/blast/blast-2.9.0.sif blastx -query E.genes.fasta -db /work/datasets/igbb/blast/2021-01-31/nr -outfmt '6 std qcovs stitle' -out E.genes-vs-nr.blast.txt -num_threads 48 -evalue 0.0000000001
Gosto.005G317600-1	KJB56077.1	69.254	335	77	5	314	1264	373	699	1.48e-149	451	73	hypothetical protein B456_009G105600 [Gossypium raimondii]
Gosto.005G317600-1	PPD86818.1	69.552	335	76	5	314	1264	421	747	1.6e-149	452	73	hypothetical protein GOBAR_DD16215 [Gossypium barbadense]
Gosto.005G317600-1	TYH70329.1	69.851	335	75	5	314	1264	586	912	2.94e-148	454	94	hypothetical protein ES332_D05G110200v1 [Gossypium tomentosum]
Gosto.005G317600-1	TYH70329.1	64.151	53	17	1	37	195	120	170	1.22e-13	62.4	94	hypothetical protein ES332_D05G110200v1 [Gossypium tomentosum]
Gosto.005G317600-1	TYH70329.1	42.623	61	21	1	171	311	168	228	1.22e-13	45.1	94	hypothetical protein ES332_D05G110200v1 [Gossypium tomentosum]
Gosto.005G317600-1	XP_016688620.1	69.552	335	76	5	314	1264	586	912	9.26e-148	453	94	PREDICTED: protein argonaute 4-like [Gossypium hirsutum]
Gosto.005G317600-1	XP_016688620.1	64.151	53	17	1	37	195	120	170	1.21e-13	62.4	94	PREDICTED: protein argonaute 4-like [Gossypium hirsutum]
Gosto.005G317600-1	XP_016688620.1	42.623	61	21	1	171	311	168	228	1.21e-13	45.1	94	PREDICTED: protein argonaute 4-like [Gossypium hirsutum]
Gosto.005G317600-1	KAB2028509.1	69.552	335	76	5	314	1264	586	912	1.24e-147	452	94	hypothetical protein ES319_D05G103000v1 [Gossypium barbadense]
Gosto.005G317600-1	KAB2028509.1	64.151	53	17	1	37	195	120	170	1.22e-13	62.4	94	hypothetical protein ES319_D05G103000v1 [Gossypium barbadense]
Gosto.005G317600-1	KAB2028509.1	42.623	61	21	1	171	311	168	228	1.22e-13	45.1	94	hypothetical protein ES319_D05G103000v1 [Gossypium barbadense]
Gosto.005G317600-1	XP_012443643.1	69.254	335	77	5	314	1264	586	912	2.07e-147	452	94	PREDICTED: protein argonaute 4-like [Gossypium raimondii]
Gosto.005G317600-1	XP_012443643.1	64.151	53	17	1	37	195	120	170	1.21e-13	62.4	94	PREDICTED: protein argonaute 4-like [Gossypium raimondii]
Gosto.005G317600-1	XP_012443643.1	42.623	61	21	1	171	311	168	228	1.21e-13	45.1	94	PREDICTED: protein argonaute 4-like [Gossypium raimondii]
Gosto.005G317600-1	XP_017606709.1	69.254	335	77	5	314	1264	586	912	9.84e-147	450	94	PREDICTED: protein argonaute 4 [Gossypium arboreum]
Gosto.005G317600-1	XP_017606709.1	64.151	53	17	1	37	195	120	170	1.23e-13	62.4	94	PREDICTED: protein argonaute 4 [Gossypium arboreum]
Gosto.005G317600-1	XP_017606709.1	42.623	61	21	1	171	311	168	228	1.23e-13	45.1	94	PREDICTED: protein argonaute 4 [Gossypium arboreum]
Gosto.005G317600-1	KAB2081042.1	69.254	335	77	5	314	1264	586	912	1.04e-146	450	94	hypothetical protein ES319_A05G106000v1 [Gossypium barbadense]
Gosto.005G317600-1	KAB2081042.1	64.151	53	17	1	37	195	120	170	1.23e-13	62.4	94	hypothetical protein ES319_A05G106000v1 [Gossypium barbadense]
Gosto.005G317600-1	KAB2081042.1	42.623	61	21	1	171	311	168	228	1.23e-13	45.1	94	hypothetical protein ES319_A05G106000v1 [Gossypium barbadense]
Gosto.005G317600-1	TYH16322.1	68.955	335	78	5	314	1264	586	912	2.67e-146	449	94	hypothetical protein ES288_A05G108000v1 [Gossypium darwinii]
Gosto.005G317600-1	TYH16322.1	64.151	53	17	1	37	195	120	170	1.22e-13	62.4	94	hypothetical protein ES288_A05G108000v1 [Gossypium darwinii]
Gosto.005G317600-1	TYH16322.1	42.623	61	21	1	171	311	168	228	1.22e-13	45.1	94	hypothetical protein ES288_A05G108000v1 [Gossypium darwinii]
Gosto.005G317600-1	TYI26354.1	68.955	335	78	5	314	1264	586	912	1.07e-145	447	94	hypothetical protein ES332_A05G109200v1 [Gossypium tomentosum]
Gosto.005G317600-1	TYI26354.1	64.151	53	17	1	37	195	120	170	1.21e-13	62.4	94	hypothetical protein ES332_A05G109200v1 [Gossypium tomentosum]
Gosto.005G317600-1	TYI26354.1	42.623	61	21	1	171	311	168	228	1.21e-13	45.1	94	hypothetical protein ES332_A05G109200v1 [Gossypium tomentosum]
Gosto.005G317600-1	PPR99983.1	67.052	346	77	6	314	1264	376	713	3.87e-145	440	73	hypothetical protein GOBAR_AA20687 [Gossypium barbadense]
Gosto.005G317600-1	KHG11406.1	68.235	340	77	6	314	1264	549	880	1.5e-144	444	94	Protein argonaute 4 -like protein [Gossypium arboreum]
Gosto.005G317600-1	KHG11406.1	64.151	53	17	1	37	195	120	170	1.24e-13	62.4	94	Protein argonaute 4 -like protein [Gossypium arboreum]
Gosto.005G317600-1	KHG11406.1	42.623	61	21	1	171	311	168	228	1.24e-13	45.1	94	Protein argonaute 4 -like protein [Gossypium arboreum]
Gosto.005G317600-1	XP_016750495.1	68.358	335	80	5	314	1264	586	912	3.8e-144	444	94	PREDICTED: protein argonaute 4-like [Gossypium hirsutum]
Gosto.005G317600-1	XP_016750495.1	62.264	53	18	1	37	195	120	170	2.29e-13	61.6	94	PREDICTED: protein argonaute 4-like [Gossypium hirsutum]
Gosto.005G317600-1	XP_016750495.1	42.623	61	21	1	171	311	168	228	2.29e-13	45.1	94	PREDICTED: protein argonaute 4-like [Gossypium hirsutum]
Gosto.005G317600-1	KHG16394.1	67.568	333	84	5	314	1264	539	863	3.67e-140	432	73	Protein argonaute 4 -like protein [Gossypium arboreum]
Gosto.005G317600-1	XP_016754788.1	67.164	335	84	5	314	1264	587	913	3.74e-140	433	73	PREDICTED: protein argonaute 4-like [Gossypium hirsutum]
Gosto.005G317600-1	PPS07162.1	66.866	335	85	5	314	1264	425	751	5.62e-140	428	73	hypothetical protein GOBAR_AA13495 [Gossypium barbadense]
Gosto.005G317600-1	XP_017625895.1	67.164	335	84	5	314	1264	587	913	3.09e-139	431	73	PREDICTED: protein argonaute 4-like [Gossypium arboreum]
Gosto.005G317600-1	XP_016732406.1	66.866	335	85	5	314	1264	587	913	1.28e-138	429	73	PREDICTED: protein argonaute 4-like [Gossypium hirsutum]
Gosto.005G317600-1	TYI16091.1	66.866	335	85	5	314	1264	587	913	1.38e-138	429	73	hypothetical protein ES332_A08G230500v1 [Gossypium tomentosum]
Gosto.005G317600-1	KAB2071245.1	66.866	335	85	5	314	1264	587	913	1.43e-138	429	73	hypothetical protein ES319_A08G208800v1 [Gossypium barbadense]
Gosto.005G317600-1	XP_012476379.1	66.866	335	85	5	314	1264	587	913	1.43e-138	429	73	PREDICTED: protein argonaute 4-like [Gossypium raimondii]
Gosto.005G317600-1	KAB2018517.1	66.866	335	85	5	314	1264	587	913	1.44e-138	429	73	hypothetical protein ES319_D08G234700v1 [Gossypium barbadense]
Gosto.005G317600-1	TYJ23783.1	66.866	335	85	5	314	1264	587	913	1.56e-138	429	73	hypothetical protein E1A91_A08G216100v1 [Gossypium mustelinum]
Gosto.005G317600-1	KAE8700218.1	64.865	333	92	6	314	1264	146	469	6.26e-138	413	73	Protein argonaute 16 [Hibiscus syriacus]
Gosto.005G317600-1	XP_022752829.1	65.075	335	91	5	314	1264	584	910	3.4e-136	423	73	protein argonaute 4-like isoform X1 [Durio zibethinus]
Gosto.005G317600-1	XP_022752832.1	65.075	335	91	5	314	1264	581	907	4.4e-136	423	73	protein argonaute 4-like isoform X2 [Durio zibethinus]
Gosto.005G317600-1	KAA3468809.1	63.689	347	83	6	314	1240	228	569	5.19e-135	410	71	protein argonaute 4-like [Gossypium australe]
Gosto.005G317600-1	MBA0584561.1	64.451	346	86	6	314	1264	587	924	1.5e-134	419	73	hypothetical protein [Gossypium raimondii]
Gosto.005G317600-1	XP_021902597.1	63.284	335	97	5	314	1264	512	838	8.48e-134	415	73	protein argonaute 4-like isoform X2 [Carica papaya]
Gosto.005G317600-1	XP_022755651.1	65.075	335	91	5	314	1264	587	913	1.53e-133	416	73	LOW QUALITY PROTEIN: protein argonaute 4-like [Durio zibethinus]
Gosto.005G317600-1	EOY34307.1	65.269	334	90	5	317	1264	588	913	1.77e-133	416	73	Argonaute family protein isoform 1 [Theobroma cacao]
Gosto.005G317600-1	XP_017982739.1	65.269	334	90	5	317	1264	588	913	2.06e-133	416	73	PREDICTED: protein argonaute 4 [Theobroma cacao]
Gosto.005G317600-1	ONI01703.1	63.284	335	97	5	314	1264	442	768	2.36e-133	412	73	hypothetical protein PRUPE_6G154800 [Prunus persica]
Gosto.005G317600-1	XP_021902594.1	63.284	335	97	5	314	1264	582	908	3.82e-133	415	73	protein argonaute 4-like isoform X1 [Carica papaya]
Gosto.005G317600-1	VVA34301.1	63.284	335	97	5	314	1264	491	817	7.77e-133	412	73	PREDICTED: argonaute [Prunus dulcis]
Gosto.005G317600-1	XP_021279393.1	64.671	334	92	5	317	1264	588	913	2.95e-132	413	73	protein argonaute 4-like [Herrania umbratica]
Gosto.005G317600-1	KAE8037700.1	62.985	335	98	5	314	1264	425	751	5.85e-132	407	73	hypothetical protein FH972_010266 [Carpinus fangiana]
Gosto.005G317600-1	KAB2606334.1	62.687	335	99	5	314	1264	443	769	6.25e-132	408	73	protein argonaute 4-like [Pyrus ussuriensis x Pyrus communis]
Gosto.005G317600-1	XP_007207224.1	63.284	335	97	5	314	1264	613	939	2.52e-131	411	73	protein argonaute 4 [Prunus persica]
Gosto.005G317600-1	XP_034219487.1	63.284	335	97	5	314	1264	613	939	2.87e-131	411	73	protein argonaute 4-like [Prunus dulcis]
Gosto.005G317600-1	PQQ14068.1	62.985	335	98	5	314	1264	549	875	3.43e-131	409	73	protein argonaute 4 [Prunus yedoensis var. nudiflora]
Gosto.005G317600-1	XP_030960996.1	63.284	335	97	5	314	1264	602	928	3.77e-131	410	73	protein argonaute 4-like [Quercus lobata]
Gosto.005G317600-1	XP_023879497.1	63.284	335	97	5	314	1264	602	928	4.29e-131	410	73	protein argonaute 4-like [Quercus suber]
Gosto.005G317600-1	XP_021830773.1	63.284	335	97	5	314	1264	610	936	5.07e-131	410	73	protein argonaute 4-like [Prunus avium]
Gosto.005G317600-1	XP_018818948.1	62.985	335	98	5	314	1264	596	922	7.29e-131	410	73	protein argonaute 4-like isoform X2 [Juglans regia]
Gosto.005G317600-1	KAF3454052.1	63.284	335	97	5	314	1264	589	915	8.06e-131	409	73	hypothetical protein FNV43_RR04499 [Rhamnella rubrinervis]
Gosto.005G317600-1	XP_018818945.1	62.985	335	98	5	314	1264	600	926	1.02e-130	409	73	protein argonaute 4-like isoform X1 [Juglans regia]
Gosto.005G317600-1	AWM95729.1	62.985	335	98	5	314	1264	602	928	1.03e-130	409	73	argonaute 4 [Castanea sativa]
Gosto.005G317600-1	KAF3958536.1	62.985	335	98	5	314	1264	602	928	1.14e-130	409	73	hypothetical protein CMV_016575 [Castanea mollissima]
Gosto.005G317600-1	KAE8037699.1	62.985	335	98	5	314	1264	597	923	1.77e-130	409	73	hypothetical protein FH972_010266 [Carpinus fangiana]
Gosto.005G317600-1	CAB4283126.1	62.985	335	98	5	314	1264	616	942	1.79e-130	409	73	unnamed protein product [Prunus armeniaca]
Gosto.005G317600-1	XP_030520851.1	62.687	335	99	5	314	1264	591	917	1.9e-130	408	73	protein argonaute 4-like isoform X1 [Rhodamnia argentea]
Gosto.005G317600-1	XP_030520852.1	62.687	335	99	5	314	1264	591	917	1.94e-130	408	73	protein argonaute 4-like isoform X2 [Rhodamnia argentea]
Gosto.005G317600-1	KAB1226561.1	63.582	335	96	5	314	1264	596	922	2.54e-130	408	73	Protein argonaute 4 [Morella rubra]
Gosto.005G317600-1	XP_009345605.1	62.687	335	99	5	314	1264	619	945	4.85e-130	408	73	PREDICTED: protein argonaute 4-like isoform X1 [Pyrus x bretschneideri]
Gosto.005G317600-1	XP_021601057.1	62.687	335	99	5	314	1264	583	909	5.2e-130	407	73	protein argonaute 4-like [Manihot esculenta]
Gosto.005G317600-1	XP_008231109.1	62.985	335	98	5	314	1264	613	939	5.39e-130	408	73	PREDICTED: protein argonaute 4 [Prunus mume]
Gosto.005G317600-1	POO01470.1	62.687	335	98	6	314	1264	478	803	6.26e-130	404	73	Exonuclease/helicase-like [Trema orientale]
Gosto.005G317600-1	XP_011653531.1	61.791	335	102	5	314	1264	589	915	1.14e-129	406	73	protein argonaute 4 [Cucumis sativus]
Gosto.005G317600-1	XP_008449865.1	61.791	335	102	5	314	1264	589	915	1.38e-129	406	73	PREDICTED: protein argonaute 4 [Cucumis melo]
Gosto.005G317600-1	GAV84720.1	63.284	335	96	6	314	1264	602	927	1.4e-129	406	73	PAZ domain-containing protein/Piwi domain-containing protein/DUF1785 domain-containing protein [Cephalotus follicularis]
Gosto.005G317600-1	XP_030458575.1	62.388	335	100	5	314	1264	599	925	1.59e-129	406	73	protein argonaute 4-like [Syzygium oleosum]
Gosto.005G317600-1	XP_022943910.1	62.09	335	101	5	314	1264	589	915	1.71e-129	406	73	protein argonaute 4-like isoform X2 [Cucurbita moschata]
Gosto.005G317600-1	GFS37844.1	62.687	335	99	5	314	1264	586	912	1.79e-129	405	73	argonaute family protein [Actinidia rufa]
Gosto.005G317600-1	XP_023512457.1	62.09	335	101	5	314	1264	589	915	1.9e-129	405	73	protein argonaute 4-like [Cucurbita pepo subsp. pepo]
Gosto.005G317600-1	XP_022006413.1	62.202	336	99	6	317	1264	419	746	1.94e-129	401	73	protein argonaute 4A isoform X2 [Helianthus annuus]
Gosto.005G317600-1	KAA8544478.1	62.687	335	99	5	314	1264	590	916	1.99e-129	405	73	hypothetical protein F0562_022482 [Nyssa sinensis]
Gosto.005G317600-1	XP_022986430.1	62.09	335	101	5	314	1264	589	915	2.03e-129	405	73	protein argonaute 4-like isoform X2 [Cucurbita maxima]
Gosto.005G317600-1	XP_008385629.2	62.687	335	99	5	314	1264	613	939	2.27e-129	406	73	protein argonaute 4 [Malus domestica]
Gosto.005G317600-1	XP_031268421.1	62.09	335	101	5	314	1264	598	924	2.38e-129	405	73	protein argonaute 4-like [Pistacia vera]
Gosto.005G317600-1	KAA8550054.1	62.687	335	99	5	314	1264	590	916	3.02e-129	405	73	hypothetical protein F0562_001738 [Nyssa sinensis]
Gosto.005G317600-1	PSR86728.1	62.687	335	99	5	314	1264	586	912	3.12e-129	405	73	Protein argonaute like [Actinidia chinensis var. chinensis]
Gosto.005G317600-1	XP_021635100.1	63.692	325	95	4	314	1234	581	900	4.11e-129	405	71	protein argonaute 4-like isoform X1 [Hevea brasiliensis]
Gosto.005G317600-1	XP_018815239.1	62.09	335	101	5	314	1264	602	928	4.5e-129	405	73	protein argonaute 4A-like [Juglans regia]
Gosto.005G317600-1	KAF2290338.1	63.692	325	95	4	314	1234	580	899	4.56e-129	404	71	hypothetical protein GH714_011246 [Hevea brasiliensis]
Gosto.005G317600-1	XP_022153847.1	61.791	335	102	5	314	1264	592	918	5.57e-129	405	73	protein argonaute 4-like [Momordica charantia]
Gosto.005G317600-1	XP_031389017.1	62.985	335	97	6	314	1264	594	919	5.82e-129	404	73	protein argonaute 4-like [Punica granatum]
Gosto.005G317600-1	XP_011006053.1	62.388	335	100	5	314	1264	585	911	7.79e-129	404	73	PREDICTED: protein argonaute 4-like [Populus euphratica]
Gosto.005G317600-1	XP_024157286.1	62.985	335	98	5	314	1264	611	937	8.06e-129	405	73	protein argonaute 4 [Rosa chinensis]
Gosto.005G317600-1	CDP09667.1	62.687	335	99	5	314	1264	542	868	8.94e-129	403	73	unnamed protein product [Coffea canephora]
Gosto.005G317600-1	XP_027101120.1	62.985	335	98	5	314	1264	593	919	1.24e-128	404	73	protein argonaute 4-like [Coffea arabica]
Gosto.005G317600-1	XP_027080953.1	62.985	335	98	5	314	1264	593	919	1.27e-128	404	73	protein argonaute 4-like [Coffea arabica]
Gosto.005G317600-1	NP_001315807.1	62.687	335	99	5	314	1264	613	939	1.32e-128	404	73	protein argonaute 4-like [Malus domestica]
Gosto.005G317600-1	XP_022943909.1	62.09	335	101	5	314	1264	639	965	1.39e-128	405	73	protein argonaute 4-like isoform X1 [Cucurbita moschata]
Gosto.005G317600-1	XP_022986429.1	62.09	335	101	5	314	1264	639	965	1.48e-128	405	73	protein argonaute 4-like isoform X1 [Cucurbita maxima]
Gosto.005G317600-1	XP_034911977.1	62.388	335	100	5	314	1264	585	911	1.61e-128	403	73	protein argonaute 4-like [Populus alba]
Gosto.005G317600-1	PON74065.1	62.09	335	100	6	314	1264	478	803	1.67e-128	400	73	Exonuclease/helicase-like [Parasponia andersonii]
Gosto.005G317600-1	XP_008363553.2	62.687	335	99	5	314	1264	613	939	1.69e-128	404	73	protein argonaute 4-like isoform X1 [Malus domestica]
Gosto.005G317600-1	KAA0040092.1	60.35	343	102	5	314	1264	589	923	1.71e-128	404	73	protein argonaute 4 [Cucumis melo var. makuwa]
Gosto.005G317600-1	XP_011461779.1	62.687	335	99	5	314	1264	618	944	2.22e-128	404	73	PREDICTED: protein argonaute 4-like [Fragaria vesca subsp. vesca]
Gosto.005G317600-1	PSR90090.1	62.388	335	100	5	314	1264	586	912	2.22e-128	403	73	Protein argonaute like [Actinidia chinensis var. chinensis]
Gosto.005G317600-1	GFZ18052.1	62.388	335	100	5	314	1264	586	912	2.25e-128	403	73	argonaute family protein [Actinidia rufa]
Gosto.005G317600-1	XP_028105165.1	61.493	335	103	5	314	1264	586	912	2.5e-128	403	73	protein argonaute 4-like [Camellia sinensis]
Gosto.005G317600-1	KAB2609971.1	62.687	335	99	5	314	1264	616	942	2.52e-128	404	73	protein argonaute 4-like [Pyrus ussuriensis x Pyrus communis]
Gosto.005G317600-1	XP_022958174.1	61.493	335	103	5	314	1264	586	912	2.55e-128	403	73	protein argonaute 4-like [Cucurbita moschata]
Gosto.005G317600-1	XP_030522519.1	61.357	339	106	6	281	1240	408	740	2.61e-128	398	74	protein argonaute 4A-like isoform X2 [Rhodamnia argentea]
Gosto.005G317600-1	XP_023533276.1	61.493	335	103	5	314	1264	586	912	2.72e-128	402	73	protein argonaute 4-like [Cucurbita pepo subsp. pepo]
Gosto.005G317600-1	XP_006369390.1	62.09	335	101	5	314	1264	585	911	4.12e-128	402	73	protein argonaute 4 [Populus trichocarpa]
Gosto.005G317600-1	XP_023759370.1	62.018	337	100	6	314	1264	574	902	4.16e-128	402	73	protein argonaute 4-like isoform X2 [Lactuca sativa]
Gosto.005G317600-1	XP_023759367.1	62.018	337	100	6	314	1264	575	903	4.74e-128	402	73	protein argonaute 4-like isoform X1 [Lactuca sativa]
Gosto.005G317600-1	XP_025608872.1	61.194	335	104	5	314	1264	585	911	4.89e-128	402	73	protein argonaute 4 [Arachis hypogaea]
Gosto.005G317600-1	XP_015973532.1	61.194	335	104	5	314	1264	585	911	5.1e-128	402	73	protein argonaute 4 [Arachis duranensis]
Gosto.005G317600-1	XP_022006412.1	62.202	336	99	6	317	1264	581	908	7.28e-128	401	73	protein argonaute 4 isoform X1 [Helianthus annuus]
Gosto.005G317600-1	XP_015873346.1	62.09	335	101	5	314	1264	589	915	7.72e-128	402	73	protein argonaute 4-like [Ziziphus jujuba]
Gosto.005G317600-1	TYH59785.1	64.179	335	84	6	314	1264	587	903	1.28e-127	400	73	hypothetical protein ES332_D08G245200v1 [Gossypium tomentosum]
Gosto.005G317600-1	XP_016166092.1	60.896	335	105	5	314	1264	585	911	1.42e-127	401	73	protein argonaute 4 [Arachis ipaensis]
Gosto.005G317600-1	RXI04951.1	64	325	94	4	314	1234	649	968	1.48e-127	404	71	hypothetical protein DVH24_039225 [Malus domestica]
Gosto.005G317600-1	KAE8711498.1	60.845	355	86	5	314	1234	587	936	1.7e-127	401	92	Protein argonaute 9 [Hibiscus syriacus]
Gosto.005G317600-1	KAE8711498.1	60.465	43	17	0	37	165	122	164	2.4e-11	52.4	92	Protein argonaute 9 [Hibiscus syriacus]
Gosto.005G317600-1	KAE8711498.1	66.667	27	9	0	231	311	204	230	2.4e-11	38.5	92	Protein argonaute 9 [Hibiscus syriacus]
Gosto.005G317600-1	KAE8711498.1	59.091	22	9	0	164	229	168	189	2.4e-11	28.5	92	Protein argonaute 9 [Hibiscus syriacus]
Gosto.005G317600-1	XP_009339636.1	62.388	335	100	5	314	1264	613	939	2.09e-127	401	73	PREDICTED: protein argonaute 4-like [Pyrus x bretschneideri]
Gosto.005G317600-1	KAB2615223.1	62.388	335	100	5	314	1264	613	939	2.2e-127	401	73	protein argonaute 4-like [Pyrus ussuriensis x Pyrus communis]
Gosto.005G317600-1	XP_002527764.1	61.194	335	104	5	314	1264	595	921	2.34e-127	400	73	protein argonaute 4 isoform X2 [Ricinus communis]
Gosto.005G317600-1	CAB4089506.1	61.721	337	101	6	314	1264	610	938	2.47e-127	401	73	unnamed protein product [Lactuca saligna]
Gosto.005G317600-1	XP_021604120.1	61.791	335	102	5	314	1264	582	908	3.11e-127	400	73	protein argonaute 4-like [Manihot esculenta]
Gosto.005G317600-1	XP_028107756.1	61.194	335	104	5	314	1264	586	912	4.86e-127	399	73	protein argonaute 4-like [Camellia sinensis]
Gosto.005G317600-1	KAF5767871.1	62.202	336	99	6	317	1264	652	979	5.25e-127	401	73	putative post-transcriptional gene silencing PAZ-Argonaute family [Helianthus annuus]
Gosto.005G317600-1	XP_010045128.1	62.691	327	96	5	314	1240	593	911	6.08e-127	399	71	PREDICTED: protein argonaute 4 [Eucalyptus grandis]
Gosto.005G317600-1	KAE9463308.1	61.468	327	103	4	314	1240	533	854	9.22e-127	397	71	hypothetical protein C3L33_04792, partial [Rhododendron williamsianum]
Gosto.005G317600-1	XP_019434369.1	60.597	335	106	5	314	1264	593	919	1.02e-126	399	73	PREDICTED: protein argonaute 4A-like [Lupinus angustifolius]
Gosto.005G317600-1	XP_030522517.1	61.357	339	106	6	281	1240	580	912	1.19e-126	399	74	protein argonaute 4-like isoform X1 [Rhodamnia argentea]
Gosto.005G317600-1	OMO91448.1	61.905	336	101	6	314	1264	520	847	1.29e-126	397	73	Argonaute/Dicer protein, PAZ [Corchorus olitorius]
Gosto.005G317600-1	XP_002275928.1	61.493	335	103	5	314	1264	587	913	1.66e-126	398	73	PREDICTED: protein argonaute 4 [Vitis vinifera]
Gosto.005G317600-1	XP_030457659.1	61.357	339	106	6	281	1240	580	912	1.69e-126	398	74	protein argonaute 4-like isoform X1 [Syzygium oleosum]
Gosto.005G317600-1	XP_021650307.1	61.194	335	104	5	314	1264	581	907	1.84e-126	398	73	protein argonaute 4-like [Hevea brasiliensis]
Gosto.005G317600-1	TKR59088.1	63.385	325	96	4	314	1234	585	904	2.06e-126	402	71	Argonaute 4 family protein [Populus alba]
Gosto.005G317600-1	OIW04162.1	60.299	335	107	5	314	1264	576	902	2.14e-126	397	73	hypothetical protein TanjilG_00722 [Lupinus angustifolius]
Gosto.005G317600-1	XP_023736133.1	61.424	337	102	6	314	1264	575	903	2.65e-126	397	73	protein argonaute 4-like isoform X2 [Lactuca sativa]
Gosto.005G317600-1	CAB4089507.1	61.424	337	102	6	314	1264	605	933	2.87e-126	398	73	unnamed protein product [Lactuca saligna]
Gosto.005G317600-1	ONI01700.1	62.09	335	97	6	314	1264	613	935	3.01e-126	398	73	hypothetical protein PRUPE_6G154800 [Prunus persica]
Gosto.005G317600-1	XP_019455891.1	60.299	335	107	5	314	1264	593	919	3.54e-126	397	73	PREDICTED: protein argonaute 4-like [Lupinus angustifolius]
Gosto.005G317600-1	XP_024970573.1	61.905	336	100	6	317	1264	588	915	3.67e-126	397	73	protein argonaute 4-like [Cynara cardunculus var. scolymus]
Gosto.005G317600-1	XP_010031652.1	60.767	339	108	6	281	1240	584	916	3.95e-126	397	74	PREDICTED: protein argonaute 4 [Eucalyptus grandis]
Gosto.005G317600-1	TXG73404.1	61.493	335	103	5	314	1264	640	966	4.12e-126	398	73	hypothetical protein EZV62_001983 [Acer yangbiense]
Gosto.005G317600-1	XP_034688176.1	61.194	335	104	5	314	1264	587	913	4.98e-126	397	73	protein argonaute 4-like [Vitis riparia]
Gosto.005G317600-1	KAE9614906.1	60	335	108	5	314	1264	591	917	5.76e-126	397	73	putative post-transcriptional gene silencing PAZ-Argonaute family [Lupinus albus]
Gosto.005G317600-1	QCD25894.1	61.31	336	102	6	317	1264	581	908	6.23e-126	396	73	argonaute 4b [Helianthus tuberosus]
Gosto.005G317600-1	PHU29436.1	61.194	335	104	5	314	1264	584	910	6.25e-126	396	73	Protein argonaute 9 [Capsicum chinense]
Gosto.005G317600-1	XP_016577953.1	61.194	335	104	5	314	1264	584	910	7.18e-126	396	73	PREDICTED: protein argonaute 4-like [Capsicum annuum]
Gosto.005G317600-1	KAF1868682.1	60	335	108	5	314	1264	602	928	7.83e-126	397	73	hypothetical protein Lal_00036120 [Lupinus albus]
Gosto.005G317600-1	KVI08080.1	61.905	336	100	6	317	1264	599	926	8.23e-126	397	73	Argonaute/Dicer protein, PAZ [Cynara cardunculus var. scolymus]
Gosto.005G317600-1	KAF8395625.1	60.896	335	105	5	314	1264	592	918	9.52e-126	396	73	hypothetical protein HHK36_019575 [Tetracentron sinense]
Gosto.005G317600-1	KAE9596274.1	60	335	108	5	314	1264	591	917	1.04e-125	396	73	putative post-transcriptional gene silencing PAZ-Argonaute family [Lupinus albus]
Gosto.005G317600-1	XP_038725529.1	60.923	325	104	4	314	1234	585	904	1.25e-125	395	71	protein argonaute 4-like [Tripterygium wilfordii]
Gosto.005G317600-1	KAF1864224.1	60	335	108	5	314	1264	607	933	1.5e-125	396	73	hypothetical protein Lal_00048789 [Lupinus albus]
Gosto.005G317600-1	KCW51008.1	61.89	328	101	5	314	1240	622	944	2.04e-125	396	71	hypothetical protein EUGRSUZ_J00634 [Eucalyptus grandis]
Gosto.005G317600-1	KDP45657.1	61.194	335	104	5	314	1264	584	910	2.11e-125	395	73	hypothetical protein JCGZ_17264 [Jatropha curcas]
Gosto.005G317600-1	KAF7153629.1	60.299	335	107	5	314	1264	593	919	2.36e-125	395	73	hypothetical protein RHSIM_Rhsim01G0196200 [Rhododendron simsii]
Gosto.005G317600-1	XP_019226649.1	61.194	335	104	5	314	1264	586	912	2.48e-125	395	73	PREDICTED: protein argonaute 4-like [Nicotiana attenuata]
Gosto.005G317600-1	KHN38433.1	60.896	335	104	6	314	1264	553	878	2.51e-125	394	73	Protein argonaute 4 [Glycine soja]
Gosto.005G317600-1	XP_009773871.1	61.194	335	104	5	314	1264	586	912	4.14e-125	394	73	PREDICTED: protein argonaute 4 [Nicotiana sylvestris]
Gosto.005G317600-1	ACZ04920.1	63.19	326	96	5	314	1234	606	926	4.53e-125	395	71	argonaute 4-like protein [Pelargonium x hortorum]
Gosto.005G317600-1	KAB5520125.1	60.058	343	103	5	314	1264	626	960	8.05e-125	395	73	hypothetical protein DKX38_024444 [Salix brachista]
Gosto.005G317600-1	XP_028219149.1	60.896	335	104	6	314	1264	581	906	9.72e-125	393	73	protein argonaute 4-like [Glycine soja]
Gosto.005G317600-1	KAE9598390.1	59.249	346	114	6	281	1264	588	924	1.02e-124	394	75	putative post-transcriptional gene silencing PAZ-Argonaute family [Lupinus albus]
Gosto.005G317600-1	XP_003519489.1	60.896	335	104	6	314	1264	581	906	1.07e-124	393	73	protein argonaute 4 [Glycine max]
Gosto.005G317600-1	ABC61504.1	60.597	335	106	5	314	1264	586	912	1.3e-124	393	73	AGO4-1, partial [Nicotiana benthamiana]
Gosto.005G317600-1	XP_006347268.1	62.462	325	99	5	314	1234	587	906	1.31e-124	393	71	PREDICTED: protein argonaute 4 [Solanum tuberosum]
Gosto.005G317600-1	XP_019440717.1	58.96	346	115	6	281	1264	589	925	1.51e-124	393	75	PREDICTED: protein argonaute 4-like [Lupinus angustifolius]
Gosto.005G317600-1	XP_016474287.1	60.896	335	105	5	314	1264	579	905	1.88e-124	392	73	PREDICTED: protein argonaute 4-like [Nicotiana tabacum]
Gosto.005G317600-1	XP_016460764.1	60.896	335	105	5	314	1264	586	912	2.16e-124	392	73	PREDICTED: protein argonaute 4-like [Nicotiana tabacum]
Gosto.005G317600-1	XP_009591976.1	60.896	335	105	5	314	1264	586	912	2.54e-124	392	73	protein argonaute 4 [Nicotiana tomentosiformis]
Gosto.005G317600-1	OIW13413.1	58.96	346	115	6	281	1264	597	933	2.83e-124	393	75	hypothetical protein TanjilG_19765 [Lupinus angustifolius]
Gosto.005G317600-1	XP_017252582.1	62.385	327	100	4	314	1240	613	934	3.34e-124	393	71	PREDICTED: protein argonaute 4 [Daucus carota subsp. sativus]
Gosto.005G317600-1	XP_015079260.1	62.462	325	99	5	314	1234	593	912	4.47e-124	392	71	protein argonaute 4-like isoform X6 [Solanum pennellii]
Gosto.005G317600-1	OIW16262.1	61.538	325	102	4	314	1234	848	1167	4.57e-124	398	71	hypothetical protein TanjilG_18977 [Lupinus angustifolius]
Gosto.005G317600-1	XP_025887079.1	62.462	325	99	5	314	1234	587	906	5.19e-124	392	71	argonaute 4B isoform X1 [Solanum lycopersicum]
Gosto.005G317600-1	NP_001289847.1	62.462	325	99	5	314	1234	587	906	5.36e-124	392	71	Argonaute 4B [Solanum lycopersicum]
Gosto.005G317600-1	XP_027773527.1	62.462	325	99	5	314	1234	594	913	5.36e-124	392	71	protein argonaute 4-like isoform X5 [Solanum pennellii]
Gosto.005G317600-1	XP_015079257.1	62.462	325	99	5	314	1234	595	914	5.43e-124	392	71	protein argonaute 4-like isoform X2 [Solanum pennellii]
Gosto.005G317600-1	XP_003545462.1	60.597	335	105	6	314	1264	581	906	5.58e-124	391	73	protein argonaute 4 [Glycine max]
Gosto.005G317600-1	XP_015079261.1	62.462	325	99	5	314	1234	587	906	5.65e-124	391	71	protein argonaute 4-like isoform X7 [Solanum pennellii]
Gosto.005G317600-1	XP_027773526.1	62.462	325	99	5	314	1234	594	913	5.66e-124	392	71	protein argonaute 4-like isoform X4 [Solanum pennellii]
Gosto.005G317600-1	XP_015079258.1	62.462	325	99	5	314	1234	595	914	6.1e-124	392	71	protein argonaute 4-like isoform X1 [Solanum pennellii]
Gosto.005G317600-1	PSS21604.1	60.299	335	107	5	314	1264	586	912	7.36e-124	391	73	Protein argonaute like [Actinidia chinensis var. chinensis]
Gosto.005G317600-1	KAD7477645.1	61.905	336	100	6	317	1264	793	1120	8.25e-124	396	73	hypothetical protein E3N88_00781 [Mikania micrantha]
Gosto.005G317600-1	RVW69425.1	58.974	351	102	5	314	1264	634	976	1.08e-123	392	73	Protein argonaute 4 [Vitis vinifera]
Gosto.005G317600-1	OMO67515.1	61.31	336	103	6	314	1264	584	911	1.08e-123	390	73	Argonaute/Dicer protein, PAZ [Corchorus capsularis]
Gosto.005G317600-1	RXH84796.1	63.438	320	94	4	314	1219	615	929	1.22e-123	394	69	hypothetical protein DVH24_040144 [Malus domestica]
Gosto.005G317600-1	XP_010689361.1	61.111	324	103	4	317	1234	585	903	1.45e-123	390	70	PREDICTED: protein argonaute 4 [Beta vulgaris subsp. vulgaris]
Gosto.005G317600-1	XP_019252085.1	60.597	335	106	5	314	1264	579	905	1.58e-123	390	73	PREDICTED: protein argonaute 4-like [Nicotiana attenuata]
Gosto.005G317600-1	XP_009785001.1	60.597	335	106	5	314	1264	580	906	1.6e-123	390	73	PREDICTED: protein argonaute 4-like [Nicotiana sylvestris]
Gosto.005G317600-1	KAF7831507.1	60.615	325	105	4	314	1234	588	907	2.08e-123	390	71	protein argonaute 4-like [Senna tora]
Gosto.005G317600-1	KVH87597.1	61.128	337	103	6	314	1264	538	866	2.16e-123	389	73	Argonaute/Dicer protein, PAZ [Cynara cardunculus var. scolymus]
Gosto.005G317600-1	TMX03438.1	62.154	325	100	5	314	1234	587	906	2.71e-123	390	71	hypothetical protein EJD97_016377 [Solanum chilense]
Gosto.005G317600-1	XP_010251689.1	60.597	335	106	5	314	1264	595	921	2.77e-123	390	73	PREDICTED: protein argonaute 4A [Nelumbo nucifera]
Gosto.005G317600-1	THG06724.1	59.292	339	110	5	314	1276	606	934	3.68e-123	390	74	hypothetical protein TEA_029507 [Camellia sinensis var. sinensis]
Gosto.005G317600-1	KAF5930218.1	57.382	359	103	6	314	1264	547	897	3.7e-123	389	73	hypothetical protein HYC85_031091 [Camellia sinensis]
Gosto.005G317600-1	XP_038706028.1	60.308	325	106	5	314	1234	584	903	4.21e-123	389	71	protein argonaute 4-like [Tripterygium wilfordii]
Gosto.005G317600-1	OMO92922.1	61.963	326	100	5	314	1234	545	865	4.53e-123	388	71	Argonaute/Dicer protein, PAZ [Corchorus olitorius]
Gosto.005G317600-1	XP_030505854.1	60	335	107	6	314	1264	582	907	4.66e-123	389	73	protein argonaute 4 [Cannabis sativa]
Gosto.005G317600-1	ABC61505.1	60.597	335	106	5	314	1264	579	905	4.69e-123	389	73	AGO4-2, partial [Nicotiana benthamiana]
Gosto.005G317600-1	XP_021776500.1	61.111	324	103	4	317	1234	589	907	5.36e-123	389	70	protein argonaute 4B-like [Chenopodium quinoa]
Gosto.005G317600-1	KAF4359511.1	60	335	107	6	314	1264	560	885	6.28e-123	388	73	hypothetical protein G4B88_020309, partial [Cannabis sativa]
Gosto.005G317600-1	XP_024963169.1	61.128	337	103	6	314	1264	583	911	7.42e-123	389	73	protein argonaute 4-like [Cynara cardunculus var. scolymus]
Gosto.005G317600-1	XP_010093805.2	62.202	336	100	6	314	1264	586	913	1.19e-122	388	73	protein argonaute 4 [Morus notabilis]
Gosto.005G317600-1	XP_015056100.1	60	335	108	5	314	1264	583	909	1.26e-122	388	73	protein argonaute 4 [Solanum pennellii]
Gosto.005G317600-1	NP_001266156.1	60	335	108	5	314	1264	583	909	1.27e-122	388	73	argonaute 4A [Solanum lycopersicum]
Gosto.005G317600-1	XP_021849470.1	61.111	324	103	4	317	1234	594	912	1.5e-122	388	70	protein argonaute 4B-like [Spinacia oleracea]
Gosto.005G317600-1	AZQ24789.1	60.597	335	106	5	314	1264	579	905	1.84e-122	387	73	argonaute 4, partial [Nicotiana benthamiana]
Gosto.005G317600-1	XP_011080473.1	59.701	335	109	5	314	1264	585	911	1.85e-122	387	73	protein argonaute 4 [Sesamum indicum]
Gosto.005G317600-1	GEV42542.1	61.963	326	99	5	317	1234	581	901	2.07e-122	387	70	protein argonaute 4-like [Tanacetum cinerariifolium]
Gosto.005G317600-1	XP_020113863.1	59.281	334	109	6	317	1264	590	914	2.12e-122	387	73	protein argonaute 4B-like [Ananas comosus]
Gosto.005G317600-1	PWA71432.1	60.714	336	104	6	317	1264	579	906	2.48e-122	387	73	argonaute family protein [Artemisia annua]
Gosto.005G317600-1	CAD1828998.1	59.281	334	109	6	317	1264	605	929	2.73e-122	387	73	unnamed protein product [Ananas comosus var. bracteatus]
Gosto.005G317600-1	CAD1829069.1	59.281	334	109	6	317	1264	604	928	2.87e-122	387	73	unnamed protein product [Ananas comosus var. bracteatus]
Gosto.005G317600-1	TMW95680.1	59.701	335	109	5	314	1264	583	909	2.95e-122	387	73	hypothetical protein EJD97_008510 [Solanum chilense]
Gosto.005G317600-1	XP_006362741.1	59.701	335	109	5	314	1264	583	909	3.32e-122	387	73	PREDICTED: protein argonaute 4 [Solanum tuberosum]
Gosto.005G317600-1	XP_006470434.1	59.701	335	109	5	314	1264	594	920	3.37e-122	387	73	protein argonaute 4-like [Citrus sinensis]
Gosto.005G317600-1	XP_006446389.1	59.701	335	109	5	314	1264	594	920	3.63e-122	387	73	protein argonaute 4 [Citrus clementina]
Gosto.005G317600-1	XP_022029991.1	60.119	336	106	6	317	1264	579	906	3.92e-122	387	73	protein argonaute 4 [Helianthus annuus]
Gosto.005G317600-1	QCD25893.1	60.119	336	106	6	317	1264	579	906	4.13e-122	386	73	argonaute 4a [Helianthus tuberosus]
Gosto.005G317600-1	XP_022866894.1	60.299	335	107	5	314	1264	601	927	4.35e-122	387	73	protein argonaute 4-like isoform X2 [Olea europaea var. sylvestris]
Gosto.005G317600-1	KAF4357769.1	60.856	327	104	5	314	1240	596	916	4.9e-122	387	71	hypothetical protein G4B88_025004, partial [Cannabis sativa]
Gosto.005G317600-1	KAD4178203.1	60.417	336	105	6	317	1264	570	897	5.72e-122	386	73	hypothetical protein E3N88_26794 [Mikania micrantha]
Gosto.005G317600-1	XP_012852636.1	60	335	108	5	314	1264	610	936	6.17e-122	387	73	PREDICTED: protein argonaute 4 [Erythranthe guttata]
Gosto.005G317600-1	CAA3020838.1	60.299	335	107	5	314	1264	659	985	6.97e-122	388	73	argonaute 4 [Olea europaea subsp. europaea]
Gosto.005G317600-1	XP_016578032.1	60.597	335	106	6	314	1264	583	909	8.38e-122	385	73	PREDICTED: protein argonaute 4 [Capsicum annuum]
Gosto.005G317600-1	PHU15730.1	60.597	335	106	6	314	1264	583	909	8.65e-122	385	73	Protein argonaute 4A [Capsicum chinense]
Gosto.005G317600-1	XP_031400799.1	60.615	325	105	4	314	1234	584	903	1.14e-121	385	71	protein argonaute 4-like isoform X2 [Punica granatum]
Gosto.005G317600-1	XP_020235740.1	59.701	335	108	6	314	1264	585	910	1.26e-121	385	73	protein argonaute 4 [Cajanus cajan]
Gosto.005G317600-1	PIA48667.1	57.313	335	117	5	314	1264	266	592	1.28e-121	376	73	hypothetical protein AQUCO_01400920v1 [Aquilegia coerulea]
Gosto.005G317600-1	KAF5937109.1	58.309	343	109	5	314	1264	586	920	1.42e-121	385	73	hypothetical protein HYC85_024615 [Camellia sinensis]
Gosto.005G317600-1	XP_031400798.1	59.524	336	112	5	281	1234	596	925	1.47e-121	385	73	protein argonaute 4A-like isoform X1 [Punica granatum]
Gosto.005G317600-1	OMO85353.1	61.35	326	102	5	314	1234	578	898	1.87e-121	385	71	Argonaute/Dicer protein, PAZ [Corchorus capsularis]
Gosto.005G317600-1	ACF82801.1	57.362	326	115	5	317	1240	67	386	1.96e-121	369	71	unknown [Zea mays]
Gosto.005G317600-1	XP_027190780.1	59.403	335	110	5	314	1264	613	939	4.47e-121	385	73	protein argonaute 4-like isoform X1 [Cicer arietinum]
Gosto.005G317600-1	XP_004501969.1	59.403	335	110	5	314	1264	592	918	5.02e-121	384	73	protein argonaute 4-like isoform X2 [Cicer arietinum]
Gosto.005G317600-1	XP_027329366.1	59.403	335	110	5	314	1264	584	910	5.41e-121	384	73	protein argonaute 4-like [Abrus precatorius]
Gosto.005G317600-1	XP_022728691.1	59.403	335	110	5	314	1264	475	801	6.27e-121	380	73	LOW QUALITY PROTEIN: protein argonaute 4-like [Durio zibethinus]
Gosto.005G317600-1	XP_004491186.1	60.55	327	103	5	314	1240	583	901	6.37e-121	383	71	protein argonaute 4-like [Cicer arietinum]
Gosto.005G317600-1	XP_028219729.1	58.507	335	113	5	314	1264	589	915	6.81e-121	384	73	protein argonaute 4-like isoform X2 [Glycine soja]
Gosto.005G317600-1	XP_006605639.1	58.507	335	113	5	314	1264	621	947	7.25e-121	384	73	protein argonaute 4 isoform X1 [Glycine max]
Gosto.005G317600-1	XP_003555656.1	58.507	335	113	5	314	1264	589	915	7.9e-121	383	73	protein argonaute 4 isoform X2 [Glycine max]
Gosto.005G317600-1	XP_028219728.1	58.507	335	113	5	314	1264	621	947	8.59e-121	384	73	protein argonaute 4-like isoform X1 [Glycine soja]
Gosto.005G317600-1	PIN12659.1	59.701	335	109	5	314	1264	584	910	8.64e-121	383	73	Translation initiation factor 2C (eIF-2C) [Handroanthus impetiginosus]
Gosto.005G317600-1	XP_016197053.1	56.647	346	123	6	281	1264	576	912	9.33e-121	383	75	protein argonaute 4 [Arachis ipaensis]
Gosto.005G317600-1	XP_037497238.1	58.601	343	108	6	314	1264	584	918	9.81e-121	383	73	protein argonaute 4 isoform X2 [Jatropha curcas]
Gosto.005G317600-1	THG17315.1	60.843	332	99	5	314	1231	519	845	9.95e-121	394	70	hypothetical protein TEA_013860 [Camellia sinensis var. sinensis]
Gosto.005G317600-1	XP_037497237.1	58.601	343	108	6	314	1264	584	918	1e-120	383	73	protein argonaute 4 isoform X1 [Jatropha curcas]
Gosto.005G317600-1	XP_015958467.1	56.069	346	125	6	281	1264	576	912	1.26e-120	383	75	protein argonaute 4 [Arachis duranensis]
Gosto.005G317600-1	XP_013461066.1	59.939	327	108	4	314	1240	597	918	1.33e-120	383	71	protein argonaute 4 [Medicago truncatula]
Gosto.005G317600-1	XP_024639674.1	60.061	328	107	5	314	1240	581	903	1.7e-120	382	71	protein argonaute 4 [Medicago truncatula]
Gosto.005G317600-1	KAF5187030.1	58.209	335	114	5	314	1264	586	912	2.82e-120	382	73	argonaute 4B [Thalictrum thalictroides]
Gosto.005G317600-1	TKY57081.1	60	335	105	6	314	1264	583	906	3.81e-120	381	73	argonaute 4 [Spatholobus suberectus]
Gosto.005G317600-1	AET00054.1	60.061	328	107	5	314	1240	621	943	4.27e-120	382	71	eukaryotic translation initiation factor 2c, putative [Medicago truncatula]
Gosto.005G317600-1	XP_011090194.1	58.507	335	113	5	314	1264	584	910	4.89e-120	381	73	protein argonaute 4-like [Sesamum indicum]
Gosto.005G317600-1	XP_027346753.1	57.015	335	118	5	314	1264	530	856	6.38e-120	379	73	protein argonaute 4-like isoform X2 [Abrus precatorius]
Gosto.005G317600-1	RHN68837.1	59.939	327	108	4	314	1240	666	987	6.48e-120	383	71	putative post-transcriptional gene silencing PAZ-Argonaute family protein [Medicago truncatula]
Gosto.005G317600-1	CDP19981.1	59.104	335	111	5	314	1264	540	866	6.52e-120	380	73	unnamed protein product [Coffea canephora]
Gosto.005G317600-1	XP_022752833.1	60.06	333	89	5	314	1264	584	888	8.06e-120	380	73	protein argonaute 4-like isoform X3 [Durio zibethinus]
Gosto.005G317600-1	GEU47327.1	60.237	337	106	6	314	1264	579	907	9.33e-120	380	73	protein argonaute 4-like [Tanacetum cinerariifolium]
Gosto.005G317600-1	XP_034909468.1	59.226	336	110	6	314	1264	586	913	1.09e-119	380	73	protein argonaute 4A-like [Populus alba]
Gosto.005G317600-1	XP_025693343.1	55.78	346	126	6	281	1264	576	912	1.11e-119	380	75	protein argonaute 4 [Arachis hypogaea]
Gosto.005G317600-1	XP_024462590.1	59.226	336	110	6	314	1264	586	913	1.14e-119	380	73	protein argonaute 4A [Populus trichocarpa]
Gosto.005G317600-1	XP_027114263.1	59.104	335	111	5	314	1264	575	901	1.14e-119	380	73	protein argonaute 4A-like [Coffea arabica]
Gosto.005G317600-1	XP_023736132.1	55.946	370	102	7	314	1264	575	936	1.17e-119	381	73	protein argonaute 4A-like isoform X1 [Lactuca sativa]
Gosto.005G317600-1	XP_028797109.1	59.701	335	108	6	314	1264	586	911	1.56e-119	380	73	protein argonaute 4-like [Prosopis alba]
Gosto.005G317600-1	XP_011032992.1	58.929	336	111	6	314	1264	586	913	1.58e-119	380	73	PREDICTED: protein argonaute 4A-like [Populus euphratica]
Gosto.005G317600-1	XP_028758019.1	59.403	335	109	6	314	1264	586	911	2.22e-119	379	73	protein argonaute 4-like [Prosopis alba]
Gosto.005G317600-1	XP_027346744.1	57.015	335	118	5	314	1264	590	916	2.33e-119	379	73	protein argonaute 4-like isoform X1 [Abrus precatorius]
Gosto.005G317600-1	XP_020215568.1	57.612	335	116	5	314	1264	592	918	3.17e-119	379	73	protein argonaute 4 [Cajanus cajan]
Gosto.005G317600-1	PIN09427.1	58.209	335	114	5	314	1264	585	911	3.62e-119	379	73	Translation initiation factor 2C (eIF-2C) [Handroanthus impetiginosus]
Gosto.005G317600-1	XP_028800053.1	58.209	335	114	5	314	1264	588	914	3.63e-119	379	73	protein argonaute 4-like [Prosopis alba]
Gosto.005G317600-1	TKY50030.1	57.612	335	116	5	314	1264	589	915	5.68e-119	379	73	argonaute 4 [Spatholobus suberectus]
Gosto.005G317600-1	PIA48666.1	57.313	335	117	5	314	1264	509	835	5.76e-119	376	73	hypothetical protein AQUCO_01400920v1 [Aquilegia coerulea]
Gosto.005G317600-1	RDY14406.1	57.313	335	117	5	314	1264	579	905	5.92e-119	378	73	Protein argonaute 4, partial [Mucuna pruriens]
Gosto.005G317600-1	MQM02796.1	58.769	325	111	4	314	1234	589	908	8.2e-119	380	71	hypothetical protein [Colocasia esculenta]
Gosto.005G317600-1	XP_007141563.1	58.507	335	108	6	314	1264	583	904	1.44e-118	377	73	hypothetical protein PHAVU_008G206500g [Phaseolus vulgaris]
Gosto.005G317600-1	OVA15617.1	59.226	336	110	6	314	1264	622	949	1.85e-118	378	73	Argonaute/Dicer protein [Macleaya cordata]
Gosto.005G317600-1	OVA13774.1	57.485	334	117	5	314	1264	586	911	1.98e-118	377	73	Argonaute/Dicer protein [Macleaya cordata]
Gosto.005G317600-1	MBA0827076.1	59.593	344	84	6	314	1264	587	902	1.98e-118	377	73	hypothetical protein [Gossypium armourianum]
Gosto.005G317600-1	MBA0554794.1	57.91	354	84	6	314	1264	439	764	2.17e-118	373	73	hypothetical protein [Gossypium lobatum]
Gosto.005G317600-1	PIA48664.1	57.313	335	117	5	314	1264	592	918	3.7e-118	376	73	hypothetical protein AQUCO_01400920v1 [Aquilegia coerulea]
Gosto.005G317600-1	RXH93757.1	58.333	336	113	6	314	1264	584	911	3.71e-118	376	73	hypothetical protein DVH24_015824 [Malus domestica]
Gosto.005G317600-1	CAA2982609.1	63.487	304	88	4	314	1171	591	889	3.86e-118	376	66	argonaute 4 [Olea europaea subsp. europaea]
Gosto.005G317600-1	XP_015621073.1	56.886	334	118	5	317	1264	579	904	4.05e-118	376	73	protein argonaute 4A [Oryza sativa Japonica Group]
Gosto.005G317600-1	XP_008375403.1	58.333	336	113	6	314	1264	584	911	4.22e-118	376	73	protein argonaute 4A-like [Malus domestica]
Gosto.005G317600-1	CAA2982610.1	63.487	304	88	4	314	1171	591	889	6.99e-118	376	66	argonaute 4 [Olea europaea subsp. europaea]
Gosto.005G317600-1	XP_007141564.1	57.91	335	110	6	314	1264	586	907	1.07e-117	375	73	hypothetical protein PHAVU_008G206600g [Phaseolus vulgaris]
Gosto.005G317600-1	XP_007141565.1	57.91	335	110	6	314	1264	583	904	1.17e-117	375	73	hypothetical protein PHAVU_008G206600g [Phaseolus vulgaris]
Gosto.005G317600-1	KAB2594906.1	58.631	336	112	6	314	1264	674	1001	1.2e-117	377	73	protein argonaute 4A-like [Pyrus ussuriensis x Pyrus communis]
Gosto.005G317600-1	KAF3658673.1	55.256	371	104	6	314	1264	711	1073	1.21e-117	379	73	Protein argonaute 9 [Capsicum annuum]
Gosto.005G317600-1	XP_017430688.1	58.507	335	108	6	314	1264	581	902	1.97e-117	374	73	PREDICTED: protein argonaute 4-like [Vigna angularis]
Gosto.005G317600-1	PWA55978.1	60.182	329	106	5	314	1240	579	902	2.05e-117	374	71	protein argonaute 16 [Artemisia annua]
Gosto.005G317600-1	XP_019164182.1	59.226	336	110	6	314	1264	580	907	2.13e-117	374	73	PREDICTED: protein argonaute 4-like [Ipomoea nil]
Gosto.005G317600-1	KAF9605295.1	56.587	334	119	5	317	1264	555	880	2.2e-117	374	73	hypothetical protein IFM89_015911, partial [Coptis chinensis]
Gosto.005G317600-1	XP_027940742.1	58.209	335	109	6	314	1264	581	902	2.39e-117	374	73	protein argonaute 4-like [Vigna unguiculata]
Gosto.005G317600-1	PHT59257.1	55.256	371	104	6	314	1264	728	1090	2.45e-117	378	73	Protein argonaute 9 [Capsicum baccatum]
Gosto.005G317600-1	PPD67966.1	55.263	380	79	6	314	1264	587	938	2.78e-117	375	73	hypothetical protein GOBAR_DD35158 [Gossypium barbadense]
Gosto.005G317600-1	EAZ11413.1	56.886	334	118	5	317	1264	672	997	3.05e-117	376	73	hypothetical protein OsJ_01274 [Oryza sativa Japonica Group]
Gosto.005G317600-1	TQE00109.1	58.258	333	95	5	314	1264	422	726	4e-117	369	73	hypothetical protein C1H46_014286 [Malus baccata]
Gosto.005G317600-1	RWR75814.1	58.154	325	113	4	314	1234	590	909	4.16e-117	374	71	protein argonaute 4 [Cinnamomum micranthum f. kanehirae]
Gosto.005G317600-1	KOM46707.1	59.271	329	106	5	314	1246	559	877	4.44e-117	375	71	hypothetical protein LR48_Vigan07g041100 [Vigna angularis]
Gosto.005G317600-1	VFR02961.1	59.701	335	106	7	314	1264	580	903	7.14e-117	373	73	unnamed protein product [Cuscuta campestris]
Gosto.005G317600-1	VAH60232.1	56.575	327	117	6	317	1240	105	425	7.4e-117	358	71	unnamed protein product [Triticum turgidum subsp. durum]
Gosto.005G317600-1	EEC70395.1	56.587	334	119	5	317	1264	546	871	7.95e-117	372	73	hypothetical protein OsI_01366 [Oryza sativa Indica Group]
Gosto.005G317600-1	RDY12178.1	57.353	340	106	5	314	1240	367	698	8.11e-117	367	71	Protein argonaute 4A, partial [Mucuna pruriens]
Gosto.005G317600-1	RYR63852.1	54.52	354	126	7	281	1264	576	920	8.95e-117	373	75	hypothetical protein Ahy_A04g021608 isoform B [Arachis hypogaea]
Gosto.005G317600-1	BAT80922.1	58.507	335	108	6	314	1264	611	932	1.07e-116	373	73	hypothetical protein VIGAN_03054900 [Vigna angularis var. angularis]
Gosto.005G317600-1	XP_026425501.1	56.456	333	120	5	317	1264	594	918	1.11e-116	372	73	protein argonaute 4A-like [Papaver somniferum]
Gosto.005G317600-1	XP_026413331.1	56.757	333	119	5	317	1264	594	918	1.22e-116	372	73	protein argonaute 4A-like [Papaver somniferum]
Gosto.005G317600-1	XP_031122127.1	59.347	337	109	6	314	1264	580	908	1.22e-116	372	73	protein argonaute 4-like [Ipomoea triloba]
Gosto.005G317600-1	KJB56073.1	70.677	266	66	4	314	1090	586	846	1.23e-116	371	81	hypothetical protein B456_009G105600 [Gossypium raimondii]
Gosto.005G317600-1	KJB56073.1	64.151	53	17	1	37	195	120	170	1.44e-13	62.4	81	hypothetical protein B456_009G105600 [Gossypium raimondii]
Gosto.005G317600-1	KJB56073.1	42.623	61	21	1	171	311	168	228	1.44e-13	45.1	81	hypothetical protein B456_009G105600 [Gossypium raimondii]
Gosto.005G317600-1	AXY97464.1	57.514	346	110	7	314	1264	586	923	1.23e-116	372	73	Argonaute family protein [Populus tomentosa]
Gosto.005G317600-1	KJB56074.1	70.149	268	66	4	314	1102	586	844	1.34e-116	370	81	hypothetical protein B456_009G105600 [Gossypium raimondii]
Gosto.005G317600-1	KJB56074.1	64.151	53	17	1	37	195	120	170	1.42e-13	62.4	81	hypothetical protein B456_009G105600 [Gossypium raimondii]
Gosto.005G317600-1	KJB56074.1	42.623	61	21	1	171	311	168	228	1.42e-13	45.1	81	hypothetical protein B456_009G105600 [Gossypium raimondii]
Gosto.005G317600-1	XP_006644052.1	55.988	334	121	5	317	1264	580	905	2.11e-116	372	73	PREDICTED: protein argonaute 4A [Oryza brachyantha]
Gosto.005G317600-1	KAF8661497.1	56.886	334	117	6	317	1264	578	902	2.37e-116	371	73	hypothetical protein HU200_056913 [Digitaria exilis]
Gosto.005G317600-1	VAH60226.1	56.575	327	117	6	317	1240	135	455	3.49e-116	357	71	unnamed protein product [Triticum turgidum subsp. durum]
Gosto.005G317600-1	XP_026399230.1	57.015	335	118	5	314	1264	585	911	3.54e-116	371	73	protein argonaute 4A-like isoform X1 [Papaver somniferum]
Gosto.005G317600-1	XP_014505052.1	57.91	335	110	6	314	1264	580	901	4.48e-116	370	73	protein argonaute 4 [Vigna radiata var. radiata]
Gosto.005G317600-1	XP_019155598.1	59.05	337	110	6	314	1264	581	909	4.86e-116	370	73	PREDICTED: protein argonaute 4-like [Ipomoea nil]
Gosto.005G317600-1	GFP94229.1	59.633	327	107	5	314	1234	591	912	5.74e-116	377	71	protein argonaute 4 [Phtheirospermum japonicum]
Gosto.005G317600-1	GFP94229.1	54.494	178	62	3	746	1240	954	1125	1.71e-48	189	71	protein argonaute 4 [Phtheirospermum japonicum]
Gosto.005G317600-1	XP_006293644.1	58.333	336	112	7	314	1264	597	923	5.93e-116	371	73	protein argonaute 4 [Capsella rubella]
Gosto.005G317600-1	VAH76092.1	56.575	327	117	6	317	1240	135	455	6.07e-116	357	71	unnamed protein product [Triticum turgidum subsp. durum]
Gosto.005G317600-1	NP_001167850.1	56.587	334	118	6	317	1264	574	898	6.27e-116	370	73	putative argonaute family protein [Zea mays]
Gosto.005G317600-1	RAL43137.1	59.403	335	107	7	314	1264	580	903	6.72e-116	370	73	hypothetical protein DM860_009919 [Cuscuta australis]
Gosto.005G317600-1	BAS87802.1	54.79	334	124	6	317	1264	197	521	1.71e-115	358	73	Os04g0151800, partial [Oryza sativa Japonica Group]
Gosto.005G317600-1	NP_001346468.1	56.587	334	118	6	317	1264	577	901	1.96e-115	369	73	uncharacterized protein LOC100217027 [Zea mays]
Gosto.005G317600-1	XP_020264507.1	58.642	324	110	5	317	1234	591	908	2.53e-115	369	70	protein argonaute 4B-like [Asparagus officinalis]
Gosto.005G317600-1	ONK67446.1	58.696	322	109	5	317	1228	555	870	2.81e-115	368	70	uncharacterized protein A4U43_C05F120 [Asparagus officinalis]
Gosto.005G317600-1	OWM73581.1	59.701	335	83	7	314	1264	659	959	3.23e-115	370	73	hypothetical protein CDL15_Pgr026680 [Punica granatum]
Gosto.005G317600-1	XP_022866891.1	54.891	368	107	6	314	1264	601	960	3.48e-115	370	73	protein argonaute 4-like isoform X1 [Olea europaea var. sylvestris]
Gosto.005G317600-1	GER39342.1	58.209	335	110	7	314	1264	571	893	4.46e-115	368	73	argonaute family protein [Striga asiatica]
Gosto.005G317600-1	XP_026391787.1	56.716	335	119	5	314	1264	585	911	4.77e-115	368	73	protein argonaute 4A-like [Papaver somniferum]
Gosto.005G317600-1	XP_010943265.1	56.716	335	118	6	317	1264	594	920	4.94e-115	368	73	protein argonaute 4B [Elaeis guineensis]
Gosto.005G317600-1	PIA48672.1	55.09	334	124	5	317	1264	576	901	7.16e-115	367	73	hypothetical protein AQUCO_01400922v1 [Aquilegia coerulea]
Gosto.005G317600-1	PIA48671.1	55.09	334	124	5	317	1264	580	905	7.82e-115	367	73	hypothetical protein AQUCO_01400922v1 [Aquilegia coerulea]
Gosto.005G317600-1	XP_020695045.1	57.015	335	116	7	317	1264	580	905	8.69e-115	367	73	protein argonaute 4B [Dendrobium catenatum]
Gosto.005G317600-1	XP_020274159.1	57.784	334	114	6	317	1264	592	916	9.62e-115	367	73	protein argonaute 4B-like [Asparagus officinalis]
Gosto.005G317600-1	XP_023637370.1	58.769	325	110	5	314	1234	578	896	1.03e-114	367	71	protein argonaute 9 [Capsella rubella]
Gosto.005G317600-1	XP_003617098.2	58.104	327	111	5	314	1240	569	887	1.23e-114	367	71	protein argonaute 4 [Medicago truncatula]
Gosto.005G317600-1	EOA19916.1	58.769	325	110	5	314	1234	597	915	1.54e-114	367	71	hypothetical protein CARUB_v10000166mg [Capsella rubella]
Gosto.005G317600-1	XP_021829918.1	58.929	336	111	6	314	1264	376	703	2.5e-114	360	73	protein argonaute 4A-like, partial [Prunus avium]
Gosto.005G317600-1	MBA0764027.1	57.345	354	95	7	314	1264	587	921	2.78e-114	366	73	hypothetical protein [Gossypium trilobum]
Gosto.005G317600-1	GER40704.1	58.055	329	113	5	314	1240	480	803	3.96e-114	363	71	argonaute family protein [Striga asiatica]
Gosto.005G317600-1	RYR63854.1	53.611	360	126	8	281	1264	576	926	4.04e-114	366	75	hypothetical protein Ahy_A04g021608 isoform A [Arachis hypogaea]
Gosto.005G317600-1	ONK63090.1	57.784	334	114	6	317	1264	633	957	4.28e-114	367	73	uncharacterized protein A4U43_C07F11320 [Asparagus officinalis]
Gosto.005G317600-1	KAF5176345.1	56.418	335	119	6	314	1264	868	1193	4.41e-114	372	73	argonaute 4B [Thalictrum thalictroides]
Gosto.005G317600-1	AQK89310.1	56.25	336	118	7	317	1264	574	900	4.73e-114	365	73	argonaute4a [Zea mays]
Gosto.005G317600-1	XP_020883961.1	58.333	336	112	7	314	1264	598	924	4.88e-114	366	73	protein argonaute 4 [Arabidopsis lyrata subsp. lyrata]
Gosto.005G317600-1	KAA8514775.1	57.612	335	113	6	314	1264	585	908	4.96e-114	365	73	hypothetical protein F0562_017954 [Nyssa sinensis]
Gosto.005G317600-1	KAF8053301.1	58.631	336	111	7	314	1264	596	922	5.2e-114	366	73	hypothetical protein N665_1435s0003 [Sinapis alba]
Gosto.005G317600-1	KZV30592.1	58.41	327	110	5	314	1240	585	903	5.88e-114	365	71	protein argonaute 4-like [Dorcoceras hygrometricum]
Gosto.005G317600-1	GFP97604.1	56.548	336	121	5	314	1267	583	911	6.27e-114	366	73	protein argonaute 4 [Phtheirospermum japonicum]
Gosto.005G317600-1	XP_007146204.1	58.112	339	112	6	314	1264	589	919	6.29e-114	365	73	hypothetical protein PHAVU_006G021200g [Phaseolus vulgaris]
Gosto.005G317600-1	RID66469.1	58.631	336	111	7	314	1264	596	922	6.93e-114	365	73	hypothetical protein BRARA_D01607 [Brassica rapa]
Gosto.005G317600-1	CDY48192.1	58.631	336	111	7	314	1264	596	922	7e-114	365	73	BnaA04g15560D [Brassica napus]
Gosto.005G317600-1	VDD13445.1	58.631	336	111	7	314	1264	597	923	7.15e-114	365	73	unnamed protein product [Brassica oleracea]
Gosto.005G317600-1	VDD13777.1	58.631	336	111	7	314	1264	597	923	7.15e-114	365	73	unnamed protein product [Brassica rapa]
Gosto.005G317600-1	KYP67675.1	53.315	362	116	6	314	1264	592	945	7.22e-114	366	73	Protein argonaute 4A [Cajanus cajan]
Gosto.005G317600-1	XP_013636662.1	58.631	336	111	7	314	1264	596	922	7.38e-114	365	73	PREDICTED: LOW QUALITY PROTEIN: protein argonaute 4-like [Brassica oleracea var. oleracea]
Gosto.005G317600-1	XP_009140756.1	58.631	336	111	7	314	1264	596	922	7.62e-114	365	73	protein argonaute 4 [Brassica rapa]
Gosto.005G317600-1	XP_013744016.1	58.631	336	111	7	314	1264	596	922	7.95e-114	365	73	protein argonaute 4 [Brassica napus]
Gosto.005G317600-1	VVB01621.1	58.631	336	111	7	314	1264	597	923	8.65e-114	365	73	unnamed protein product [Arabis nemorensis]
Gosto.005G317600-1	XP_008805343.1	56.716	335	118	6	317	1264	593	919	1.2e-113	365	73	protein argonaute 4B-like isoform X1 [Phoenix dactylifera]
Gosto.005G317600-1	KAF0917524.1	55.09	334	124	5	317	1264	591	916	1.33e-113	364	73	hypothetical protein E2562_020631 [Oryza meyeriana var. granulata]
Gosto.005G317600-1	XP_019056590.1	55.908	347	125	7	281	1264	589	926	1.34e-113	365	75	PREDICTED: protein argonaute 4 isoform X1 [Tarenaya hassleriana]
Gosto.005G317600-1	GFY94277.1	62.752	298	88	4	314	1153	568	860	1.42e-113	364	64	argonaute family protein [Actinidia rufa]
Gosto.005G317600-1	XP_010521596.1	55.908	347	125	7	281	1264	583	920	1.58e-113	364	75	PREDICTED: protein argonaute 4 isoform X2 [Tarenaya hassleriana]
Gosto.005G317600-1	GER54739.1	60.131	306	99	4	314	1177	605	905	1.65e-113	364	66	argonaute family protein [Striga asiatica]
Gosto.005G317600-1	PUZ57256.1	55.988	334	120	6	317	1264	578	902	1.92e-113	363	73	hypothetical protein GQ55_5G415100 [Panicum hallii var. hallii]
Gosto.005G317600-1	XP_006408675.1	58.631	336	111	7	314	1264	596	922	2.04e-113	364	73	protein argonaute 4 [Eutrema salsugineum]
Gosto.005G317600-1	XP_010473093.1	57.143	336	116	7	314	1264	597	923	2.2e-113	364	73	PREDICTED: protein argonaute 4 [Camelina sativa]
Gosto.005G317600-1	XP_018485102.1	58.333	336	112	7	314	1264	597	923	2.22e-113	364	73	PREDICTED: protein argonaute 4 [Raphanus sativus]
Gosto.005G317600-1	XP_022732816.1	56.609	348	111	7	314	1264	582	920	2.55e-113	364	73	protein argonaute 4-like [Durio zibethinus]
Gosto.005G317600-1	RLM91261.1	56.25	336	116	7	317	1264	575	899	2.75e-113	363	73	protein argonaute 4A-like [Panicum miliaceum]
Gosto.005G317600-1	XP_008231755.1	58.41	327	108	5	314	1240	581	897	2.79e-113	363	71	PREDICTED: protein argonaute 4A-like [Prunus mume]
Gosto.005G317600-1	OAP08704.1	58.036	336	113	7	314	1264	598	924	2.99e-113	364	73	OCP11 [Arabidopsis thaliana]
Gosto.005G317600-1	XP_018477050.1	58.333	336	112	7	314	1264	597	923	3.58e-113	363	73	PREDICTED: protein argonaute 4 [Raphanus sativus]
Gosto.005G317600-1	XP_010420963.1	58.154	325	112	5	314	1234	577	895	3.87e-113	363	71	PREDICTED: protein argonaute 9 [Camelina sativa]
Gosto.005G317600-1	XP_018439696.1	58.333	336	112	7	314	1264	597	923	4.29e-113	363	73	PREDICTED: protein argonaute 4-like [Raphanus sativus]
Gosto.005G317600-1	XP_004967701.1	55.988	334	120	6	317	1264	578	902	4.45e-113	363	73	protein argonaute 4A [Setaria italica]
Gosto.005G317600-1	XP_020877222.1	57.846	325	113	5	314	1234	577	895	4.49e-113	363	71	protein argonaute 9 [Arabidopsis lyrata subsp. lyrata]
Gosto.005G317600-1	XP_018436555.1	58.333	336	112	7	314	1264	597	923	4.97e-113	363	73	PREDICTED: protein argonaute 4-like [Raphanus sativus]
Gosto.005G317600-1	XP_021312391.1	55.988	334	120	6	317	1264	576	900	5.1e-113	362	73	protein argonaute 4A-like [Sorghum bicolor]
Gosto.005G317600-1	NP_001189613.1	58.036	336	113	7	314	1264	598	924	5.13e-113	363	73	Argonaute family protein [Arabidopsis thaliana]
Gosto.005G317600-1	XP_020583523.1	56.716	335	118	6	317	1264	581	907	5.39e-113	363	73	protein argonaute 4B-like [Phalaenopsis equestris]
Gosto.005G317600-1	XP_034596166.1	55.988	334	120	6	317	1264	578	902	5.74e-113	362	73	protein argonaute 4A-like [Setaria viridis]
Gosto.005G317600-1	KAF7036328.1	55.821	335	120	7	317	1264	439	764	5.77e-113	359	73	hypothetical protein CFC21_047032 [Triticum aestivum]
Gosto.005G317600-1	VAH60227.1	55.821	335	120	7	317	1264	439	764	6.03e-113	359	73	unnamed protein product [Triticum turgidum subsp. durum]
Gosto.005G317600-1	XP_017440087.1	57.91	335	115	5	314	1264	589	915	6.34e-113	363	73	PREDICTED: protein argonaute 4-like [Vigna angularis]
Gosto.005G317600-1	VYS53641.1	57.738	336	114	7	314	1264	598	924	7.05e-113	363	73	unnamed protein product [Arabidopsis thaliana]
Gosto.005G317600-1	XP_019259031.1	55.522	335	123	5	314	1264	561	887	7.1e-113	362	73	PREDICTED: protein argonaute 4A-like [Nicotiana attenuata]
Gosto.005G317600-1	XP_013636695.1	58.631	336	111	7	314	1264	597	923	7.43e-113	363	73	PREDICTED: protein argonaute 4 [Brassica oleracea var. oleracea]
Gosto.005G317600-1	CDY56413.1	58.631	336	111	7	314	1264	597	923	8.09e-113	363	73	BnaC04g54830D [Brassica napus]
Gosto.005G317600-1	XP_010493235.1	58.154	325	112	5	314	1234	576	894	8.14e-113	362	71	PREDICTED: protein argonaute 9-like isoform X1 [Camelina sativa]
Gosto.005G317600-1	XP_009103572.1	58.333	336	112	7	314	1264	597	923	8.18e-113	362	73	protein argonaute 4 [Brassica rapa]
Gosto.005G317600-1	KAF6146444.1	57.669	326	113	5	317	1234	554	874	8.56e-113	362	70	hypothetical protein GIB67_037744 [Kingdonia uniflora]
Gosto.005G317600-1	VAH60228.1	55.821	335	120	7	317	1264	447	772	8.99e-113	358	73	unnamed protein product [Triticum turgidum subsp. durum]
Gosto.005G317600-1	VDC98415.1	58.333	336	112	7	314	1264	598	924	9.38e-113	362	73	unnamed protein product [Brassica rapa]
Gosto.005G317600-1	KAF3577031.1	58.631	336	111	7	314	1264	591	917	9.48e-113	362	73	hypothetical protein DY000_02030602 [Brassica cretica]
Gosto.005G317600-1	XP_013692202.1	58.631	336	111	7	314	1264	597	923	9.59e-113	362	73	protein argonaute 4-like [Brassica napus]
Gosto.005G317600-1	VDD08311.1	58.631	336	111	7	314	1264	598	924	9.69e-113	362	73	unnamed protein product [Brassica oleracea]
Gosto.005G317600-1	CAA0372296.1	57.738	336	114	7	314	1264	604	930	9.99e-113	362	73	unnamed protein product [Arabidopsis thaliana]
Gosto.005G317600-1	XP_013653705.1	58.333	336	112	7	314	1264	597	923	1.08e-112	362	73	protein argonaute 4 isoform X2 [Brassica napus]
Gosto.005G317600-1	KAF3559253.1	58.631	336	111	7	314	1264	597	923	1.24e-112	362	73	hypothetical protein F2Q69_00012483 [Brassica cretica]
Gosto.005G317600-1	VAH76118.1	55.821	335	120	7	317	1264	441	766	1.31e-112	358	73	unnamed protein product [Triticum turgidum subsp. durum]
Gosto.005G317600-1	VAH76091.1	55.821	335	120	7	317	1264	394	719	1.35e-112	357	73	unnamed protein product [Triticum turgidum subsp. durum]
Gosto.005G317600-1	BAD94152.1	56.442	326	118	5	314	1237	255	574	1.37e-112	352	71	zwille/pinhead-like protein, partial [Arabidopsis thaliana]
Gosto.005G317600-1	XP_010510823.1	57.143	336	116	7	314	1264	597	923	1.61e-112	362	73	PREDICTED: protein argonaute 4 [Camelina sativa]
Gosto.005G317600-1	KAF2569456.1	58.631	336	111	7	314	1264	591	917	1.68e-112	362	73	hypothetical protein F2Q68_00025148 [Brassica cretica]
Gosto.005G317600-1	KAG0487854.1	55.821	335	121	6	317	1264	561	887	2.59e-112	360	73	hypothetical protein HPP92_006665 [Vanilla planifolia]
Gosto.005G317600-1	QNU10183.1	57.538	325	114	5	314	1234	577	895	2.67e-112	361	71	argonaute 9 [Arabidopsis halleri]
Gosto.005G317600-1	VAH76117.1	55.821	335	120	7	317	1264	449	774	2.72e-112	357	73	unnamed protein product [Triticum turgidum subsp. durum]
Gosto.005G317600-1	KAG0489535.1	55.821	335	121	6	317	1264	562	888	2.83e-112	360	73	hypothetical protein HPP92_006398 [Vanilla planifolia]
Gosto.005G317600-1	TEY86181.1	57.143	350	109	6	314	1264	596	937	3e-112	362	73	eukaryotic translation initiation factor 2C [Salvia splendens]
Gosto.005G317600-1	KAF9864489.1	60.396	303	82	4	314	1177	251	530	3.04e-112	352	66	hypothetical protein H0E87_024081, partial [Populus deltoides]
Gosto.005G317600-1	XP_034202859.1	58.929	336	111	6	314	1264	584	911	4.74e-112	360	73	protein argonaute 4A-like [Prunus dulcis]
Gosto.005G317600-1	XP_007220876.1	58.929	336	111	6	314	1264	584	911	4.95e-112	360	73	protein argonaute 4A [Prunus persica]
Gosto.005G317600-1	XP_019108186.1	55.357	336	123	6	314	1264	583	910	5.62e-112	360	73	PREDICTED: protein argonaute 4A-like [Beta vulgaris subsp. vulgaris]
Gosto.005G317600-1	VVB16907.1	56.615	325	118	4	314	1234	580	899	5.86e-112	360	71	unnamed protein product [Arabis nemorensis]
Gosto.005G317600-1	XP_008231753.1	58.929	336	111	6	314	1264	583	910	6.18e-112	360	73	PREDICTED: protein argonaute 4A-like [Prunus mume]
Gosto.005G317600-1	XP_025815816.1	55.689	334	121	6	317	1264	578	902	6.93e-112	360	73	protein argonaute 4A-like [Panicum hallii]
Gosto.005G317600-1	KAF0891619.1	55.389	334	122	6	317	1264	587	911	7.24e-112	360	73	hypothetical protein E2562_010604 [Oryza meyeriana var. granulata]
Gosto.005G317600-1	VAH60221.1	55.821	335	120	7	317	1264	565	890	8.44e-112	359	73	unnamed protein product [Triticum turgidum subsp. durum]
Gosto.005G317600-1	KAF7029304.1	55.821	335	120	7	317	1264	555	880	1.01e-111	358	73	hypothetical protein CFC21_041093 [Triticum aestivum]
Gosto.005G317600-1	VAH76094.1	55.821	335	120	7	317	1264	555	880	1.01e-111	358	73	unnamed protein product [Triticum turgidum subsp. durum]
Gosto.005G317600-1	VAH60224.1	55.821	335	120	7	317	1264	574	899	1.15e-111	359	73	unnamed protein product [Triticum turgidum subsp. durum]
Gosto.005G317600-1	EMS68540.1	55.821	335	120	7	317	1264	591	916	1.18e-111	359	73	Protein argonaute 4A [Triticum urartu]
Gosto.005G317600-1	AVH78650.1	55.821	335	120	7	317	1264	591	916	1.2e-111	359	73	argonaute 4 [Triticum aestivum]
Gosto.005G317600-1	VAH60233.1	55.821	335	120	7	317	1264	595	920	1.22e-111	359	73	unnamed protein product [Triticum turgidum subsp. durum]
Gosto.005G317600-1	XP_034202862.1	57.015	335	113	6	314	1264	581	902	1.3e-111	359	73	protein argonaute 4A-like [Prunus dulcis]
Gosto.005G317600-1	VAH60223.1	55.821	335	120	7	317	1264	570	895	1.38e-111	358	73	unnamed protein product [Triticum turgidum subsp. durum]
Gosto.005G317600-1	CAB4268631.1	58.104	327	109	5	314	1240	581	897	1.38e-111	359	71	unnamed protein product [Prunus armeniaca]
Gosto.005G317600-1	XP_020191212.1	55.821	335	120	7	317	1264	591	916	1.38e-111	359	73	protein argonaute 4A [Aegilops tauschii subsp. tauschii]
Gosto.005G317600-1	XP_037412675.1	55.821	335	120	7	317	1264	593	918	1.49e-111	359	73	protein argonaute 4A isoform X2 [Triticum dicoccoides]
Gosto.005G317600-1	KAF7036326.1	55.821	335	120	7	317	1264	595	920	1.57e-111	359	73	hypothetical protein CFC21_047032 [Triticum aestivum]
Gosto.005G317600-1	TQE04467.1	55.014	349	117	8	314	1264	502	842	1.78e-111	357	73	hypothetical protein C1H46_009883 [Malus baccata]
Gosto.005G317600-1	XP_013721856.1	57.229	332	112	7	314	1234	407	733	2.24e-111	354	71	protein argonaute 9-like [Brassica napus]
Gosto.005G317600-1	XP_037405361.1	55.821	335	120	7	317	1264	591	916	2.53e-111	358	73	protein argonaute 4A-like isoform X2 [Triticum dicoccoides]
Gosto.005G317600-1	VAH60211.1	55.821	335	120	7	317	1264	619	944	2.78e-111	359	73	unnamed protein product [Triticum turgidum subsp. durum]
Gosto.005G317600-1	PKA57956.1	57.015	335	117	6	317	1264	580	906	2.87e-111	358	73	Protein argonaute 4B [Apostasia shenzhenica]
Gosto.005G317600-1	VAH76096.1	55.821	335	120	7	317	1264	594	919	3.03e-111	358	73	unnamed protein product [Triticum turgidum subsp. durum]
Gosto.005G317600-1	XP_024176090.1	56.839	329	115	6	314	1234	585	908	3.06e-111	358	71	protein argonaute 4A-like [Rosa chinensis]
Gosto.005G317600-1	TEY81411.1	56.215	354	110	6	314	1264	596	941	3.1e-111	359	73	eukaryotic translation initiation factor 2C [Salvia splendens]
Gosto.005G317600-1	XP_014522154.1	56.38	337	119	6	314	1264	589	917	3.94e-111	358	73	protein argonaute 4 isoform X2 [Vigna radiata var. radiata]
Gosto.005G317600-1	XP_014522152.1	56.38	337	119	6	314	1264	592	920	4.03e-111	358	73	protein argonaute 4 isoform X1 [Vigna radiata var. radiata]
Gosto.005G317600-1	VAH76093.1	55.821	335	120	7	317	1264	616	941	4.53e-111	358	73	unnamed protein product [Triticum turgidum subsp. durum]
Gosto.005G317600-1	XP_004308183.1	56.213	338	118	7	317	1264	586	915	4.57e-111	358	73	PREDICTED: protein argonaute 4A-like [Fragaria vesca subsp. vesca]
Gosto.005G317600-1	QCD79300.1	57.313	335	117	5	314	1264	589	915	4.82e-111	358	73	argonaute [Vigna unguiculata]
Gosto.005G317600-1	VAH76095.1	55.821	335	120	7	317	1264	619	944	4.92e-111	358	73	unnamed protein product [Triticum turgidum subsp. durum]
Gosto.005G317600-1	XP_027932065.1	57.313	335	117	5	314	1264	589	915	4.93e-111	358	73	protein argonaute 4-like [Vigna unguiculata]
Gosto.005G317600-1	AHW98535.1	54.79	334	124	6	317	1264	587	911	4.93e-111	358	73	argonaute 4b [Oryza nivara]
Gosto.005G317600-1	XP_015636673.1	54.79	334	124	6	317	1264	587	911	5.03e-111	358	73	protein argonaute 4B [Oryza sativa Japonica Group]
Gosto.005G317600-1	EEC76718.1	54.79	334	124	6	317	1264	587	911	5.25e-111	357	73	hypothetical protein OsI_14737 [Oryza sativa Indica Group]
Gosto.005G317600-1	AHW98638.1	54.79	334	124	6	317	1264	587	911	5.25e-111	357	73	argonaute 4b [Oryza glaberrima]
Gosto.005G317600-1	XP_009801790.1	55.224	335	124	5	314	1264	561	887	5.33e-111	357	73	PREDICTED: protein argonaute 4A-like [Nicotiana sylvestris]
Gosto.005G317600-1	AAO73892.1	55.821	335	121	6	314	1264	567	892	5.46e-111	357	73	PAZ (Piwi Argonaut and Zwille) family [Arabidopsis thaliana]
Gosto.005G317600-1	OAO96317.1	55.821	335	121	6	314	1264	571	896	5.53e-111	357	73	AGO9 [Arabidopsis thaliana]
Gosto.005G317600-1	KAF7029303.1	55.821	335	120	7	317	1264	619	944	5.59e-111	358	73	hypothetical protein CFC21_041093 [Triticum aestivum]
Gosto.005G317600-1	RLN25256.1	55.389	334	122	6	317	1264	578	902	5.77e-111	357	73	protein argonaute 4A-like [Panicum miliaceum]
Gosto.005G317600-1	GFZ13050.1	53.846	364	106	7	314	1234	526	884	6.08e-111	358	71	argonaute family protein [Actinidia rufa]
Gosto.005G317600-1	KAE8812673.1	55.522	335	121	7	317	1264	596	921	6.28e-111	358	73	Protein argonaute 4A [Hordeum vulgare]
Gosto.005G317600-1	XP_037412673.1	55.821	335	120	7	317	1264	632	957	6.47e-111	358	73	protein argonaute 4A isoform X1 [Triticum dicoccoides]
Gosto.005G317600-1	VAH76097.1	55.821	335	120	7	317	1264	619	944	6.68e-111	358	73	unnamed protein product [Triticum turgidum subsp. durum]
Gosto.005G317600-1	NP_197613.2	56.748	326	117	5	314	1237	571	890	6.69e-111	357	71	Argonaute family protein [Arabidopsis thaliana]
Gosto.005G317600-1	GER34610.1	55.06	336	123	7	314	1264	582	908	6.84e-111	357	73	argonaute family protein [Striga asiatica]
Gosto.005G317600-1	KAF7036327.1	55.821	335	120	7	317	1264	647	972	7.22e-111	358	73	hypothetical protein CFC21_047032 [Triticum aestivum]
Gosto.005G317600-1	AGO99010.1	55.821	335	120	7	317	1264	644	969	9.04e-111	358	73	argonaute 4, partial [Triticum aestivum]
Gosto.005G317600-1	MTV28050.1	55.786	337	106	7	317	1240	57	379	1.13e-110	341	71	hypothetical protein [Nitriliruptoraceae bacterium ZYF776]
Gosto.005G317600-1	CAA7061156.1	56.615	325	117	5	314	1234	570	888	1.17e-110	356	71	unnamed protein product [Microthlaspi erraticum]
Gosto.005G317600-1	XP_037405359.1	55.821	335	120	7	317	1264	630	955	1.21e-110	358	73	protein argonaute 4A-like isoform X1 [Triticum dicoccoides]
Gosto.005G317600-1	XP_006652094.1	54.192	334	126	6	317	1264	587	911	1.53e-110	356	73	PREDICTED: protein argonaute 4B [Oryza brachyantha]
Gosto.005G317600-1	KAF2605603.1	58.631	336	111	7	314	1264	1046	1372	1.62e-110	365	73	hypothetical protein F2Q70_00027933 [Brassica cretica]
Gosto.005G317600-1	KAF7036330.1	55.821	335	120	7	317	1264	677	1002	1.68e-110	358	73	hypothetical protein CFC21_047032 [Triticum aestivum]
Gosto.005G317600-1	KAF7036329.1	55.821	335	120	7	317	1264	676	1001	1.69e-110	358	73	hypothetical protein CFC21_047032 [Triticum aestivum]
Gosto.005G317600-1	XP_016487831.1	54.925	335	125	5	314	1264	561	887	2.26e-110	355	73	PREDICTED: protein argonaute 4A-like [Nicotiana tabacum]
Gosto.005G317600-1	CAB4268632.1	57.349	347	122	6	314	1291	584	925	2.82e-110	358	75	unnamed protein product [Prunus armeniaca]
Gosto.005G317600-1	VAH76099.1	55.821	335	120	7	317	1264	681	1006	2.94e-110	358	73	unnamed protein product [Triticum turgidum subsp. durum]
Gosto.005G317600-1	ASD56988.1	55.821	335	120	7	317	1264	674	999	3.11e-110	357	73	argonaute 4 [Triticum aestivum]
Gosto.005G317600-1	VAH76098.1	55.821	335	120	7	317	1264	680	1005	3.35e-110	358	73	unnamed protein product [Triticum turgidum subsp. durum]
Gosto.005G317600-1	XP_006400685.1	56.928	332	113	7	314	1234	570	896	5.23e-110	355	71	protein argonaute 9 [Eutrema salsugineum]
Gosto.005G317600-1	XP_018470148.1	57.229	332	112	7	314	1234	573	899	5.28e-110	355	71	PREDICTED: protein argonaute 9-like [Raphanus sativus]
Gosto.005G317600-1	QNU10185.1	56.615	325	117	5	314	1234	577	895	8.24e-110	354	71	argonaute 9 [Arabidopsis halleri]
Gosto.005G317600-1	VYS67511.1	56.442	326	118	5	314	1237	571	890	8.69e-110	354	71	unnamed protein product [Arabidopsis thaliana]
Gosto.005G317600-1	QNU10184.1	56.615	325	117	5	314	1234	577	895	8.69e-110	354	71	argonaute 9 [Arabidopsis halleri]
Gosto.005G317600-1	RID73806.1	57.229	332	112	7	314	1234	573	899	8.97e-110	354	71	hypothetical protein BRARA_B00933 [Brassica rapa]
Gosto.005G317600-1	CAD66636.1	55.224	335	123	6	314	1264	571	896	1.07e-109	354	73	ARGONAUTE9 protein [Arabidopsis thaliana]
Gosto.005G317600-1	XP_009126507.2	57.229	332	112	7	314	1234	573	899	1.14e-109	354	71	protein argonaute 9 [Brassica rapa]
Gosto.005G317600-1	KAB5543946.1	52	375	114	7	314	1264	620	986	1.28e-109	355	73	hypothetical protein DKX38_012058 [Salix brachista]
Gosto.005G317600-1	XP_028059500.1	56.615	325	118	4	314	1234	591	910	1.39e-109	354	71	protein argonaute 4A-like [Camellia sinensis]
Gosto.005G317600-1	CDY09103.1	57.229	332	112	7	314	1234	573	899	1.57e-109	353	71	BnaA02g05290D [Brassica napus]
Gosto.005G317600-1	VDC86045.1	57.229	332	112	7	314	1234	573	899	1.59e-109	353	71	unnamed protein product [Brassica rapa]
Gosto.005G317600-1	XP_031103904.1	56.119	335	115	6	314	1264	566	886	1.9e-109	353	73	protein argonaute 4A-like [Ipomoea triloba]
Gosto.005G317600-1	VDD20188.1	57.229	332	112	8	314	1234	573	899	2.72e-109	353	71	unnamed protein product [Brassica oleracea]
Gosto.005G317600-1	XP_013616454.1	56.928	332	113	7	314	1234	573	899	3.06e-109	353	71	PREDICTED: protein argonaute 9-like [Brassica oleracea var. oleracea]
Gosto.005G317600-1	XP_024196027.1	55.357	336	123	6	314	1264	565	892	3.4e-109	352	73	protein argonaute 4A-like [Rosa chinensis]
Gosto.005G317600-1	AGB34311.1	54.925	335	123	7	317	1264	591	916	5.23e-109	352	73	Argonaute [Triticum aestivum]
Gosto.005G317600-1	XP_025887457.1	58.769	325	111	5	314	1234	578	897	8.46e-109	352	71	protein argonaute 4-like [Solanum lycopersicum]
Gosto.005G317600-1	CAA7018399.1	57.44	336	114	8	317	1264	599	925	8.56e-109	352	73	unnamed protein product [Microthlaspi erraticum]
Gosto.005G317600-1	MBA0730264.1	57.647	340	91	7	314	1264	587	896	9.51e-109	351	73	hypothetical protein [Gossypium laxum]
Gosto.005G317600-1	XP_019418271.1	54.328	335	127	5	314	1264	578	904	1.01e-108	351	73	PREDICTED: protein argonaute 4B-like [Lupinus angustifolius]
Gosto.005G317600-1	KAE9594012.1	53.731	335	129	5	314	1264	577	903	1.02e-108	351	73	putative post-transcriptional gene silencing PAZ-Argonaute family [Lupinus albus]
Gosto.005G317600-1	KAF8724214.1	56.886	334	117	6	317	1264	578	902	1.05e-108	351	73	hypothetical protein HU200_021234 [Digitaria exilis]
Gosto.005G317600-1	XP_015079262.1	58.769	325	111	5	314	1234	578	897	1.1e-108	351	71	protein argonaute 4 [Solanum pennellii]
Gosto.005G317600-1	XP_002440386.1	54.79	334	123	7	317	1264	586	909	1.2e-108	351	73	protein argonaute 4B [Sorghum bicolor]
Gosto.005G317600-1	XP_011091875.1	54.627	335	126	5	314	1264	583	909	1.53e-108	351	73	protein argonaute 4A-like [Sesamum indicum]
Gosto.005G317600-1	XP_034893909.1	54.762	336	125	6	314	1264	594	921	1.76e-108	351	73	protein argonaute 4A-like [Populus alba]
Gosto.005G317600-1	KAB5519229.1	54.762	336	125	6	314	1264	624	951	3.15e-108	351	73	hypothetical protein DKX38_023548 [Salix brachista]
Gosto.005G317600-1	XP_002323196.2	54.762	336	125	6	314	1264	594	921	3.25e-108	350	73	protein argonaute 4A [Populus trichocarpa]
Gosto.005G317600-1	XP_018674223.1	57.485	334	116	5	317	1264	590	915	3.29e-108	350	73	PREDICTED: protein argonaute 4B-like [Musa acuminata subsp. malaccensis]
Gosto.008G115300-1	XP_016705496.1	92.009	463	29	2	217	1602	20	475	0	800	84	PREDICTED: molybdate-anion transporter-like [Gossypium hirsutum]
Gosto.008G115300-1	MBA0763188.1	90.538	465	27	2	217	1560	20	484	0	788	81	hypothetical protein [Gossypium trilobum]
Gosto.008G115300-1	TYI14412.1	92.857	448	25	1	217	1560	20	460	0	787	81	hypothetical protein ES332_A08G119500v1 [Gossypium tomentosum]
Gosto.008G115300-1	KAB2016809.1	92.634	448	26	1	217	1560	20	460	0	786	81	hypothetical protein ES319_D08G118700v1 [Gossypium barbadense]
Gosto.008G115300-1	XP_017612111.1	92.857	448	25	1	217	1560	20	460	0	786	81	PREDICTED: molybdate-anion transporter-like [Gossypium arboreum]
Gosto.008G115300-1	MBA0853245.1	88.842	475	26	1	217	1560	20	494	0	784	81	hypothetical protein [Gossypium schwendimanii]
Gosto.008G115300-1	XP_012474632.1	92.411	448	27	1	217	1560	20	460	0	783	81	PREDICTED: molybdate-anion transporter-like [Gossypium raimondii]
Gosto.008G115300-1	MBA0610784.1	92.188	448	28	1	217	1560	20	460	0	783	81	hypothetical protein [Gossypium davidsonii]
Gosto.008G115300-1	XP_022723128.1	91.741	448	30	1	217	1560	20	460	0	782	81	molybdate-anion transporter-like [Durio zibethinus]
Gosto.008G115300-1	KAB2054504.1	91.295	448	32	1	217	1560	20	460	0	779	81	hypothetical protein ES319_A12G259000v1 [Gossypium barbadense]
Gosto.008G115300-1	XP_022737154.1	91.071	448	33	1	217	1560	20	460	0	778	81	molybdate-anion transporter-like [Durio zibethinus]
Gosto.008G115300-1	XP_016716540.1	91.071	448	33	1	217	1560	20	460	0	777	81	PREDICTED: molybdate-anion transporter-like [Gossypium hirsutum]
Gosto.008G115300-1	XP_017607785.1	91.071	448	33	1	217	1560	20	460	0	777	81	PREDICTED: molybdate-anion transporter-like [Gossypium arboreum]
Gosto.008G115300-1	EOY23648.1	90.179	448	37	1	217	1560	20	460	0	776	81	Major facilitator superfamily protein [Theobroma cacao]
Gosto.008G115300-1	XP_007039147.2	90.179	448	37	1	217	1560	20	460	0	776	81	PREDICTED: molybdate-anion transporter [Theobroma cacao]
Gosto.008G115300-1	XP_016737271.1	90.848	448	34	1	217	1560	20	460	0	775	81	PREDICTED: molybdate-anion transporter-like [Gossypium hirsutum]
Gosto.008G115300-1	XP_012439958.1	90.625	448	35	1	217	1560	20	460	0	774	81	PREDICTED: molybdate-anion transporter-like [Gossypium raimondii]
Gosto.008G115300-1	XP_022763422.1	89.955	448	38	1	217	1560	20	460	0	773	81	molybdate-anion transporter-like [Durio zibethinus]
Gosto.008G115300-1	TYI52892.1	90.625	448	35	1	217	1560	20	460	0	773	81	hypothetical protein E1A91_D12G280600v1 [Gossypium mustelinum]
Gosto.008G115300-1	XP_021282866.1	89.955	448	38	1	217	1560	20	460	0	773	81	molybdate-anion transporter [Herrania umbratica]
Gosto.008G115300-1	OMO93555.1	89.062	448	42	1	217	1560	20	460	0	772	81	hypothetical protein COLO4_16823 [Corchorus olitorius]
Gosto.008G115300-1	OMO87877.1	89.062	448	42	1	217	1560	20	460	0	772	81	hypothetical protein CCACVL1_08689 [Corchorus capsularis]
Gosto.008G115300-1	KAE8699832.1	89.732	448	39	1	217	1560	20	460	0	771	81	Rhodanese/Cell cycle control phosphatase superfamily protein isoform 1 [Hibiscus syriacus]
Gosto.008G115300-1	KAE8727361.1	89.509	448	40	1	217	1560	75	515	0	771	81	Rhodanese/Cell cycle control phosphatase superfamily protein isoform 1 [Hibiscus syriacus]
Gosto.008G115300-1	PPE02929.1	85.54	491	28	3	217	1560	20	510	0	770	81	hypothetical protein GOBAR_DD00051 [Gossypium barbadense]
Gosto.008G115300-1	MBA0616744.1	89.955	448	38	1	217	1560	20	460	0	768	81	hypothetical protein [Gossypium davidsonii]
Gosto.008G115300-1	KAE8662726.1	89.062	448	42	1	217	1560	20	460	0	767	81	Rhodanese/Cell cycle control phosphatase superfamily protein isoform 1 [Hibiscus syriacus]
Gosto.008G115300-1	KAB1669263.1	89.955	448	35	2	217	1560	14	451	0	767	81	hypothetical protein ES319_1Z060700v1 [Gossypium barbadense]
Gosto.008G115300-1	XP_016670812.1	89.955	448	35	2	217	1560	20	457	0	767	81	PREDICTED: molybdate-anion transporter-like [Gossypium hirsutum]
Gosto.008G115300-1	MBA0768733.1	89.732	448	39	1	217	1560	20	460	0	767	81	hypothetical protein [Gossypium trilobum]
Gosto.008G115300-1	MBA0859113.1	89.732	448	39	1	217	1560	20	460	0	766	81	hypothetical protein [Gossypium schwendimanii]
Gosto.008G115300-1	TYI66182.1	89.732	448	36	2	217	1560	20	457	0	766	81	hypothetical protein E1A91_D09G207700v1 [Gossypium mustelinum]
Gosto.008G115300-1	MBA0768147.1	89.732	448	36	2	217	1560	20	457	0	766	81	hypothetical protein [Gossypium trilobum]
Gosto.008G115300-1	XP_012486572.1	89.732	448	36	2	217	1560	20	457	0	766	81	PREDICTED: molybdate-anion transporter-like [Gossypium raimondii]
Gosto.008G115300-1	XP_012488620.1	89.732	448	39	1	217	1560	20	460	0	766	81	PREDICTED: molybdate-anion transporter-like [Gossypium raimondii]
Gosto.008G115300-1	MBA0856583.1	89.509	448	37	2	217	1560	20	457	0	766	81	hypothetical protein [Gossypium schwendimanii]
Gosto.008G115300-1	KAE8694286.1	88.616	448	44	1	217	1560	20	460	0	765	81	Rhodanese/Cell cycle control phosphatase superfamily protein isoform 1 [Hibiscus syriacus]
Gosto.008G115300-1	XP_016709575.1	89.509	448	40	1	217	1560	20	460	0	765	81	PREDICTED: molybdate-anion transporter-like [Gossypium hirsutum]
Gosto.008G115300-1	XP_017608580.1	89.732	448	36	2	217	1560	20	457	0	765	81	PREDICTED: molybdate-anion transporter-like [Gossypium arboreum]
Gosto.008G115300-1	TYJ07611.1	89.509	448	40	1	217	1560	20	460	0	764	81	hypothetical protein E1A91_A11G017200v1 [Gossypium mustelinum]
Gosto.008G115300-1	TYI11543.1	89.509	448	37	2	217	1560	20	457	0	764	81	hypothetical protein ES332_A09G214600v1 [Gossypium tomentosum]
Gosto.008G115300-1	MBA0616069.1	89.955	448	35	2	217	1560	20	457	0	764	81	hypothetical protein [Gossypium davidsonii]
Gosto.008G115300-1	TYI53601.1	89.509	448	40	1	217	1560	20	460	0	763	81	hypothetical protein E1A91_D11G016200v1 [Gossypium mustelinum]
Gosto.008G115300-1	KHG25593.1	89.509	448	37	2	217	1560	20	457	0	762	81	Major facilitator superfamily domain-containing protein 5 [Gossypium arboreum]
Gosto.008G115300-1	MBA0768146.1	87.013	462	43	2	217	1560	20	478	0	761	81	hypothetical protein [Gossypium trilobum]
Gosto.008G115300-1	KJB37396.1	89.532	449	36	3	217	1560	20	458	0	761	81	hypothetical protein B456_006G202900 [Gossypium raimondii]
Gosto.008G115300-1	XP_021649631.1	87.248	447	50	1	217	1557	20	459	0	756	81	molybdate-anion transporter-like [Hevea brasiliensis]
Gosto.008G115300-1	KAE8717480.1	88.839	448	40	2	217	1560	20	457	0	756	81	Rhodanese/Cell cycle control phosphatase superfamily protein isoform 1 [Hibiscus syriacus]
Gosto.008G115300-1	XP_002515682.1	87.696	447	48	1	217	1557	20	459	0	754	81	molybdate-anion transporter [Ricinus communis]
Gosto.008G115300-1	XP_021626974.1	87.025	447	51	1	217	1557	20	459	0	754	81	molybdate-anion transporter-like [Manihot esculenta]
Gosto.008G115300-1	KAE8725355.1	88.789	446	40	2	223	1560	22	457	0	752	81	Rhodanese/Cell cycle control phosphatase superfamily protein isoform 1 [Hibiscus syriacus]
Gosto.008G115300-1	XP_021649634.1	87.472	447	49	1	217	1557	20	459	0	752	81	molybdate-anion transporter-like [Hevea brasiliensis]
Gosto.008G115300-1	KAA3459962.1	88.393	448	31	2	217	1560	20	446	0	745	81	molybdate-anion transporter-like [Gossypium australe]
Gosto.008G115300-1	KAF5942112.1	85.938	448	56	1	217	1560	20	460	0	744	81	hypothetical protein HYC85_019754 [Camellia sinensis]
Gosto.008G115300-1	XP_002274807.1	85.011	447	60	1	217	1557	20	459	0	743	81	PREDICTED: molybdate-anion transporter [Vitis vinifera]
Gosto.008G115300-1	PIN16552.1	85.906	447	56	1	217	1557	20	459	0	743	81	putative sugar transporter [Handroanthus impetiginosus]
Gosto.008G115300-1	XP_028099507.1	85.714	448	57	1	217	1560	20	460	0	742	81	molybdate-anion transporter [Camellia sinensis]
Gosto.008G115300-1	XP_006441179.1	86.577	447	52	2	217	1557	20	458	0	741	81	molybdate-anion transporter [Citrus clementina]
Gosto.008G115300-1	GAV82818.1	85.682	447	57	1	217	1557	20	459	0	741	81	DUF791 domain-containing protein [Cephalotus follicularis]
Gosto.008G115300-1	KJB23940.1	91.096	438	30	2	217	1530	20	448	0	741	80	hypothetical protein B456_004G122300 [Gossypium raimondii]
Gosto.008G115300-1	KDO59671.1	86.353	447	53	2	217	1557	20	458	0	741	81	hypothetical protein CISIN_1g012629mg [Citrus sinensis]
Gosto.008G115300-1	XP_034711432.1	84.787	447	61	1	217	1557	20	459	0	739	81	molybdate-anion transporter [Vitis riparia]
Gosto.008G115300-1	KAA8533568.1	84.889	450	58	2	217	1557	20	462	0	739	81	hypothetical protein F0562_030998 [Nyssa sinensis]
Gosto.008G115300-1	XP_021909589.1	86.13	447	55	1	217	1557	20	459	0	738	81	molybdate-anion transporter [Carica papaya]
Gosto.008G115300-1	PSS32296.1	85.235	447	59	1	217	1557	20	459	0	738	81	Molybdate-anion transporter like [Actinidia chinensis var. chinensis]
Gosto.008G115300-1	XP_038709879.1	85.235	447	59	1	217	1557	20	459	0	737	81	molybdate-anion transporter-like [Tripterygium wilfordii]
Gosto.008G115300-1	XP_018842813.1	85.459	447	58	1	217	1557	20	459	0	737	81	molybdate-anion transporter [Juglans regia]
Gosto.008G115300-1	MBA0826305.1	84	450	38	3	217	1560	20	437	0	737	81	hypothetical protein [Gossypium armourianum]
Gosto.008G115300-1	XP_015865781.1	85.906	447	55	2	217	1557	20	458	0	736	81	molybdate-anion transporter-like [Ziziphus jujuba]
Gosto.008G115300-1	PSS11931.1	85.011	447	60	1	217	1557	20	459	0	736	81	Molybdate-anion transporter like [Actinidia chinensis var. chinensis]
Gosto.008G115300-1	PON81220.1	85.459	447	58	1	217	1557	20	459	0	736	81	Molybdate-anion transporter [Trema orientale]
Gosto.008G115300-1	CAA2986876.1	84.564	447	62	1	217	1557	20	459	0	736	81	molybdate-anion transporter-like [Olea europaea subsp. europaea]
Gosto.008G115300-1	KAF3975889.1	84.116	447	64	1	217	1557	20	459	0	735	81	hypothetical protein CMV_000868 [Castanea mollissima]
Gosto.008G115300-1	XP_027110006.1	85.682	447	57	1	217	1557	20	459	0	735	81	molybdate-anion transporter-like [Coffea arabica]
Gosto.008G115300-1	XP_031389912.1	85.906	447	55	2	217	1557	20	458	0	735	81	molybdate-anion transporter [Punica granatum]
Gosto.008G115300-1	XP_034925444.1	85.011	447	59	2	217	1557	20	458	0	734	81	molybdate-anion transporter-like [Populus alba]
Gosto.008G115300-1	XP_030933116.1	84.116	447	64	1	217	1557	20	459	0	734	81	molybdate-anion transporter-like [Quercus lobata]
Gosto.008G115300-1	KAF9833250.1	84.787	447	60	2	217	1557	20	458	0	734	81	hypothetical protein H0E87_002218 [Populus deltoides]
Gosto.008G115300-1	XP_002321382.1	84.787	447	60	2	217	1557	20	458	0	734	81	molybdate-anion transporter [Populus trichocarpa]
Gosto.008G115300-1	XP_028806686.1	85.011	447	59	2	217	1557	20	458	0	734	81	molybdate-anion transporter-like [Prosopis alba]
Gosto.008G115300-1	KJB37397.1	88.356	438	40	2	217	1518	20	450	0	733	79	hypothetical protein B456_006G202900 [Gossypium raimondii]
Gosto.008G115300-1	XP_010555746.1	85.235	447	59	1	217	1557	20	459	0	733	81	PREDICTED: molybdate-anion transporter-like [Tarenaya hassleriana]
Gosto.008G115300-1	CDP05020.1	85.459	447	58	1	217	1557	20	459	0	733	81	unnamed protein product [Coffea canephora]
Gosto.008G115300-1	XP_011084541.1	85.011	447	60	1	217	1557	20	459	0	733	81	molybdate-anion transporter [Sesamum indicum]
Gosto.008G115300-1	THF97941.1	82.937	463	57	2	217	1560	20	475	0	733	81	hypothetical protein TEA_015184 [Camellia sinensis var. sinensis]
Gosto.008G115300-1	RVW14507.1	82.073	463	60	2	217	1557	20	475	0	733	81	Molybdate-anion transporter [Vitis vinifera]
Gosto.008G115300-1	XP_023893210.1	83.893	447	65	1	217	1557	20	459	0	732	81	molybdate-anion transporter-like [Quercus suber]
Gosto.008G115300-1	XP_011043683.1	85.235	447	58	2	217	1557	20	458	0	731	81	PREDICTED: molybdate-anion transporter-like [Populus euphratica]
Gosto.008G115300-1	TXG48562.1	83.669	447	65	2	217	1557	20	458	0	731	81	hypothetical protein EZV62_024437 [Acer yangbiense]
Gosto.008G115300-1	XP_018818792.1	84.564	447	61	2	217	1557	20	458	0	731	81	molybdate-anion transporter-like [Juglans regia]
Gosto.008G115300-1	XP_038686815.1	84.34	447	63	1	217	1557	20	459	0	731	81	molybdate-anion transporter [Tripterygium wilfordii]
Gosto.008G115300-1	PON72009.1	84.564	447	62	1	217	1557	20	459	0	731	81	Molybdate-anion transporter [Parasponia andersonii]
Gosto.008G115300-1	TKY74054.1	84.564	447	61	2	217	1557	20	458	0	731	81	Molybdate-anion transporter [Spatholobus suberectus]
Gosto.008G115300-1	XP_028790731.1	84.564	447	61	2	217	1557	20	458	0	730	81	molybdate-anion transporter-like isoform X2 [Prosopis alba]
Gosto.008G115300-1	XP_011043684.1	84.787	447	60	2	217	1557	20	458	0	730	81	PREDICTED: molybdate-anion transporter-like [Populus euphratica]
Gosto.008G115300-1	KAB1205132.1	84.787	447	61	1	217	1557	20	459	0	730	81	Molybdate-anion transporter [Morella rubra]
Gosto.008G115300-1	OWM79662.1	84.547	453	57	2	217	1557	20	465	0	730	81	hypothetical protein CDL15_Pgr023074 [Punica granatum]
Gosto.008G115300-1	XP_021843151.1	85.235	447	58	2	217	1557	20	458	0	730	81	molybdate-anion transporter [Spinacia oleracea]
Gosto.008G115300-1	KAF7131992.1	84.34	447	63	1	217	1557	20	459	0	730	81	hypothetical protein RHSIM_Rhsim09G0207600 [Rhododendron simsii]
Gosto.008G115300-1	XP_012084644.1	84.564	447	61	2	217	1557	20	458	0	729	81	molybdate-anion transporter [Jatropha curcas]
Gosto.008G115300-1	XP_011044697.1	84.787	447	60	2	217	1557	20	458	0	729	81	PREDICTED: molybdate-anion transporter-like [Populus euphratica]
Gosto.008G115300-1	KJB52533.1	90	430	36	1	217	1506	20	442	0	729	78	hypothetical protein B456_008G266400 [Gossypium raimondii]
Gosto.008G115300-1	XP_022137892.1	84.116	447	63	2	217	1557	20	458	0	729	81	molybdate-anion transporter-like [Momordica charantia]
Gosto.008G115300-1	KAE9587256.1	83.445	447	66	2	217	1557	20	458	0	728	81	putative molybdate-anion transporter, major facilitator superfamily domain-containing protein [Lupinus albus]
Gosto.008G115300-1	MBA0652007.1	86.384	448	39	2	217	1560	20	445	0	728	81	hypothetical protein [Gossypium klotzschianum]
Gosto.008G115300-1	XP_021774986.1	85.011	447	59	2	217	1557	20	458	0	728	81	molybdate-anion transporter-like [Chenopodium quinoa]
Gosto.008G115300-1	XP_003523346.1	84.787	447	60	2	217	1557	20	458	0	728	81	molybdate-anion transporter [Glycine max]
Gosto.008G115300-1	XP_010537061.1	84.821	448	60	2	217	1557	20	460	0	728	81	PREDICTED: molybdate-anion transporter [Tarenaya hassleriana]
Gosto.008G115300-1	XP_014518760.1	84.564	447	61	2	217	1557	20	458	0	727	81	molybdate-anion transporter [Vigna radiata var. radiata]
Gosto.008G115300-1	XP_019437336.1	83.445	447	66	2	217	1557	20	458	0	727	81	PREDICTED: molybdate-anion transporter-like [Lupinus angustifolius]
Gosto.008G115300-1	TEY84666.1	83.296	449	67	2	217	1560	20	461	0	727	81	hypothetical protein Saspl_006329 [Salvia splendens]
Gosto.008G115300-1	MBA0685324.1	86.161	448	40	2	217	1560	20	445	0	726	81	hypothetical protein [Gossypium aridum]
Gosto.008G115300-1	XP_031264084.1	84.34	447	62	2	217	1557	20	458	0	726	81	molybdate-anion transporter-like [Pistacia vera]
Gosto.008G115300-1	KAE9608846.1	82.998	447	68	2	217	1557	20	458	0	726	81	putative molybdate-anion transporter, major facilitator superfamily domain-containing protein [Lupinus albus]
Gosto.008G115300-1	XP_010671392.1	84.34	447	62	2	217	1557	20	458	0	726	81	PREDICTED: molybdate-anion transporter [Beta vulgaris subsp. vulgaris]
Gosto.008G115300-1	KHN19524.1	84.564	447	61	2	217	1557	20	458	0	726	81	Major facilitator superfamily domain-containing protein 5 [Glycine soja]
Gosto.008G115300-1	GAY60402.1	85.523	449	54	4	217	1557	20	459	0	726	81	hypothetical protein CUMW_201760 [Citrus unshiu]
Gosto.008G115300-1	GER46736.1	83.445	447	67	1	217	1557	20	459	0	726	81	major facilitator superfamily protein [Striga asiatica]
Gosto.008G115300-1	CAB4271641.1	83.221	447	68	1	217	1557	20	459	0	726	81	unnamed protein product [Prunus armeniaca]
Gosto.008G115300-1	XP_008234689.1	83.445	447	67	1	217	1557	20	459	0	726	81	PREDICTED: molybdate-anion transporter [Prunus mume]
Gosto.008G115300-1	XP_027368626.1	84.116	447	63	2	217	1557	20	458	0	726	81	molybdate-anion transporter-like isoform X1 [Abrus precatorius]
Gosto.008G115300-1	XP_012843199.1	82.998	447	69	1	217	1557	20	459	0	726	81	PREDICTED: LOW QUALITY PROTEIN: molybdate-anion transporter [Erythranthe guttata]
Gosto.008G115300-1	XP_003526731.1	84.564	447	61	2	217	1557	20	458	0	726	81	molybdate-anion transporter [Glycine max]
Gosto.008G115300-1	MBA0714303.1	85.938	448	41	2	217	1560	20	445	0	725	81	hypothetical protein [Gossypium laxum]
Gosto.008G115300-1	XP_017422383.1	84.34	447	62	2	217	1557	20	458	0	725	81	PREDICTED: molybdate-anion transporter-like [Vigna angularis]
Gosto.008G115300-1	XP_034203998.1	83.221	447	68	1	217	1557	20	459	0	725	81	molybdate-anion transporter-like [Prunus dulcis]
Gosto.008G115300-1	KJB39449.1	89.72	428	37	1	217	1500	20	440	0	725	78	hypothetical protein B456_007G016500 [Gossypium raimondii]
Gosto.008G115300-1	XP_021763666.1	84.787	447	59	2	217	1557	20	457	0	725	81	molybdate-anion transporter-like [Chenopodium quinoa]
Gosto.008G115300-1	TEY23760.1	83.002	453	65	3	217	1560	20	465	0	724	81	hypothetical protein Saspl_041507 [Salvia splendens]
Gosto.008G115300-1	KJB39452.1	88.94	434	39	2	217	1512	20	446	0	724	78	hypothetical protein B456_007G016500 [Gossypium raimondii]
Gosto.008G115300-1	PPR82587.1	90.909	418	31	1	307	1560	103	513	0	724	76	hypothetical protein GOBAR_AA38124 [Gossypium barbadense]
Gosto.008G115300-1	XP_022146711.1	82.774	447	70	1	217	1557	20	459	0	724	81	molybdate-anion transporter-like [Momordica charantia]
Gosto.008G115300-1	XP_027903859.1	84.564	447	61	2	217	1557	20	458	0	724	81	molybdate-anion transporter [Vigna unguiculata]
Gosto.008G115300-1	TMX02199.1	83.108	444	68	1	226	1557	24	460	0	724	81	hypothetical protein EJD97_022408 [Solanum chilense]
Gosto.008G115300-1	KAE8077647.1	83.669	447	66	1	217	1557	20	459	0	724	81	hypothetical protein FH972_016193 [Carpinus fangiana]
Gosto.008G115300-1	XP_021893403.1	82.667	450	69	2	217	1560	20	462	0	724	81	molybdate-anion transporter isoform X1 [Carica papaya]
Gosto.008G115300-1	XP_007136474.1	84.116	447	63	2	217	1557	20	458	0	723	81	hypothetical protein PHAVU_009G048300g [Phaseolus vulgaris]
Gosto.008G115300-1	KZV38065.1	82.103	447	73	1	217	1557	20	459	0	723	81	hypothetical protein F511_16085 [Dorcoceras hygrometricum]
Gosto.008G115300-1	XP_038684764.1	83.929	448	64	2	217	1557	20	460	0	723	81	molybdate-anion transporter-like isoform X1 [Tripterygium wilfordii]
Gosto.008G115300-1	XP_010318046.1	82.883	444	69	1	226	1557	24	460	0	723	81	molybdate-anion transporter [Solanum lycopersicum]
Gosto.008G115300-1	XP_007217984.1	82.998	447	69	1	217	1557	20	459	0	723	81	molybdate-anion transporter [Prunus persica]
Gosto.008G115300-1	KAA3454866.1	87.33	442	35	2	217	1500	20	454	0	723	78	molybdate-anion transporter-like [Gossypium australe]
Gosto.008G115300-1	RDX93387.1	84.375	448	61	3	217	1557	20	459	0	723	81	Molybdate-anion transporter [Mucuna pruriens]
Gosto.008G115300-1	XP_010541494.1	82.55	447	71	1	217	1557	20	459	0	723	81	PREDICTED: molybdate-anion transporter [Tarenaya hassleriana]
Gosto.008G115300-1	XP_010048797.1	83.669	447	66	1	217	1557	20	459	0	723	81	PREDICTED: molybdate-anion transporter [Eucalyptus grandis]
Gosto.008G115300-1	XP_002318449.1	84.34	447	62	2	217	1557	20	458	0	723	81	molybdate-anion transporter [Populus trichocarpa]
Gosto.008G115300-1	OAO98810.1	82.103	447	73	1	217	1557	20	459	0	723	81	hypothetical protein AXX17_AT4G31940 [Arabidopsis thaliana]
Gosto.008G115300-1	XP_020232055.1	83.893	447	64	2	217	1557	20	458	0	723	81	molybdate-anion transporter [Cajanus cajan]
Gosto.008G115300-1	XP_004145939.1	83.221	447	67	2	217	1557	20	458	0	722	81	molybdate-anion transporter [Cucumis sativus]
Gosto.008G115300-1	XP_010109217.1	83.669	447	65	2	217	1557	20	458	0	722	81	molybdate-anion transporter [Morus notabilis]
Gosto.008G115300-1	CAA7023326.1	82.103	447	73	1	217	1557	20	459	0	722	81	unnamed protein product [Microthlaspi erraticum]
Gosto.008G115300-1	XP_034897489.1	84.34	447	62	2	217	1557	20	458	0	722	81	molybdate-anion transporter-like [Populus alba]
Gosto.008G115300-1	XP_030460332.1	83.221	447	68	1	217	1557	20	459	0	721	81	molybdate-anion transporter [Syzygium oleosum]
Gosto.008G115300-1	MBA0651333.1	86.161	448	37	3	217	1560	20	442	0	721	81	hypothetical protein [Gossypium klotzschianum]
Gosto.008G115300-1	NP_567786.1	81.879	447	74	1	217	1557	20	459	0	721	81	Major facilitator superfamily protein [Arabidopsis thaliana]
Gosto.008G115300-1	XP_008439575.1	82.998	447	69	1	217	1557	20	459	0	721	81	PREDICTED: molybdate-anion transporter-like [Cucumis melo]
Gosto.008G115300-1	XP_002869545.1	81.879	447	74	1	217	1557	20	459	0	721	81	molybdate-anion transporter [Arabidopsis lyrata subsp. lyrata]
Gosto.008G115300-1	XP_011075930.1	83.669	447	65	2	217	1557	20	458	0	721	81	molybdate-anion transporter [Sesamum indicum]
Gosto.008G115300-1	XP_006350499.1	82.883	444	69	1	226	1557	24	460	0	721	81	PREDICTED: molybdate-anion transporter-like [Solanum tuberosum]
Gosto.008G115300-1	XP_034677170.1	84.633	449	57	3	217	1557	20	458	0	721	81	molybdate-anion transporter-like isoform X1 [Vitis riparia]
Gosto.008G115300-1	TEY53628.1	82.183	449	72	2	217	1560	20	461	0	721	81	hypothetical protein Saspl_019688 [Salvia splendens]
Gosto.008G115300-1	XP_002280860.1	84.633	449	57	3	217	1557	20	458	0	721	81	PREDICTED: molybdate-anion transporter [Vitis vinifera]
Gosto.008G115300-1	AFI41203.1	81.879	447	74	1	217	1557	20	459	0	721	81	major facilitator protein, partial [Arabidopsis thaliana]
Gosto.008G115300-1	XP_008437621.1	83.221	447	68	1	217	1557	20	459	0	720	81	PREDICTED: molybdate-anion transporter [Cucumis melo]
Gosto.008G115300-1	MBA0616068.1	83.906	466	35	4	217	1560	20	463	0	720	81	hypothetical protein [Gossypium davidsonii]
Gosto.008G115300-1	XP_019234788.1	82.658	444	70	1	226	1557	24	460	0	720	81	PREDICTED: molybdate-anion transporter-like [Nicotiana attenuata]
Gosto.008G115300-1	XP_008376777.1	82.103	447	73	1	217	1557	20	459	0	720	81	molybdate-anion transporter [Malus domestica]
Gosto.008G115300-1	PPD69597.1	90.431	418	33	1	307	1560	103	513	0	720	76	hypothetical protein GOBAR_DD33520 [Gossypium barbadense]
Gosto.008G115300-1	XP_015934229.1	83.221	447	67	2	217	1557	20	458	0	719	81	molybdate-anion transporter [Arachis duranensis]
Gosto.008G115300-1	XP_028096145.1	83.929	448	65	1	217	1560	20	460	0	719	81	molybdate-anion transporter-like [Camellia sinensis]
Gosto.008G115300-1	TEY38413.1	81.778	450	72	3	217	1560	20	461	0	719	81	hypothetical protein Saspl_026457 [Salvia splendens]
Gosto.008G115300-1	XP_010448086.1	81.655	447	75	1	217	1557	20	459	0	719	81	PREDICTED: molybdate-anion transporter-like [Camelina sativa]
Gosto.008G115300-1	XP_006391594.1	81.96	449	72	2	217	1557	20	461	0	719	81	molybdate-anion transporter [Eutrema salsugineum]
Gosto.008G115300-1	CAA7048910.1	82.774	447	70	1	217	1557	20	459	0	719	81	unnamed protein product [Microthlaspi erraticum]
Gosto.008G115300-1	XP_022878519.1	84.34	447	63	1	217	1557	20	459	0	719	81	molybdate-anion transporter-like [Olea europaea var. sylvestris]
Gosto.008G115300-1	XP_015896368.1	82.889	450	67	3	217	1560	20	461	0	719	81	molybdate-anion transporter-like [Ziziphus jujuba]
Gosto.008G115300-1	PHT53419.1	82.432	444	71	1	226	1557	24	460	0	719	81	hypothetical protein CQW23_07881 [Capsicum baccatum]
Gosto.008G115300-1	THG00819.1	83.929	448	65	1	217	1560	61	501	0	719	81	hypothetical protein TEA_016881 [Camellia sinensis var. sinensis]
Gosto.008G115300-1	XP_010433324.1	81.655	447	75	1	217	1557	20	459	0	719	81	PREDICTED: molybdate-anion transporter-like [Camelina sativa]
Gosto.008G115300-1	XP_012858517.1	82.103	447	73	1	217	1557	20	459	0	719	81	PREDICTED: molybdate-anion transporter-like [Erythranthe guttata]
Gosto.008G115300-1	XP_009796128.1	82.658	444	70	1	226	1557	24	460	0	719	81	PREDICTED: molybdate-anion transporter-like [Nicotiana sylvestris]
Gosto.008G115300-1	XP_009361322.1	82.103	447	73	1	217	1557	20	459	0	719	81	PREDICTED: molybdate-anion transporter-like [Pyrus x bretschneideri]
Gosto.008G115300-1	XP_006413035.1	82.55	447	71	1	217	1557	20	459	0	719	81	molybdate-anion transporter [Eutrema salsugineum]
Gosto.008G115300-1	XP_022958287.1	83.445	447	66	2	217	1557	20	458	0	719	81	molybdate-anion transporter [Cucurbita moschata]
Gosto.008G115300-1	XP_020890378.1	81.737	449	73	2	217	1557	20	461	0	719	81	molybdate-anion transporter [Arabidopsis lyrata subsp. lyrata]
Gosto.008G115300-1	CAA3005032.1	84.564	447	62	1	217	1557	36	475	0	718	81	molybdate-anion transporter-like [Olea europaea subsp. europaea]
Gosto.008G115300-1	XP_016163278.1	82.998	447	68	2	217	1557	20	458	0	718	81	molybdate-anion transporter [Arachis ipaensis]
Gosto.008G115300-1	XP_022995802.1	83.221	447	67	2	217	1557	20	458	0	718	81	molybdate-anion transporter-like [Cucurbita maxima]
Gosto.008G115300-1	XP_010438562.1	81.655	447	75	1	217	1557	20	459	0	718	81	PREDICTED: molybdate-anion transporter [Camelina sativa]
Gosto.008G115300-1	XP_010496627.1	82.183	449	71	2	217	1557	20	461	0	718	81	PREDICTED: molybdate-anion transporter [Camelina sativa]
Gosto.008G115300-1	XP_016564309.1	82.207	444	72	1	226	1557	24	460	0	718	81	PREDICTED: molybdate-anion transporter-like [Capsicum annuum]
Gosto.008G115300-1	PQP95184.1	81.879	447	74	1	217	1557	20	459	0	717	81	molybdate-anion transporter [Prunus yedoensis var. nudiflora]
Gosto.008G115300-1	KFK27713.1	82.103	447	73	1	217	1557	20	459	0	717	81	hypothetical protein AALP_AA8G420100 [Arabis alpina]
Gosto.008G115300-1	BAF00766.1	81.737	449	73	2	217	1557	20	461	0	717	81	hypothetical protein [Arabidopsis thaliana]
Gosto.008G115300-1	NP_176646.1	81.96	449	72	2	217	1557	20	461	0	717	81	Major facilitator superfamily protein [Arabidopsis thaliana]
Gosto.008G115300-1	XP_010430611.1	81.737	449	73	2	217	1557	20	461	0	717	81	PREDICTED: molybdate-anion transporter [Camelina sativa]
Gosto.008G115300-1	MBA0645873.1	89.171	434	30	2	310	1560	1	434	0	717	76	hypothetical protein [Gossypium klotzschianum]
Gosto.008G115300-1	XP_009629563.1	82.658	444	70	1	226	1557	24	460	0	717	81	molybdate-anion transporter-like [Nicotiana tomentosiformis]
Gosto.008G115300-1	XP_015871255.1	86.207	435	52	2	253	1557	1	427	0	717	79	molybdate-anion transporter-like, partial [Ziziphus jujuba]
Gosto.008G115300-1	XP_030532259.1	82.774	447	70	1	217	1557	20	459	0	717	81	molybdate-anion transporter [Rhodamnia argentea]
Gosto.008G115300-1	XP_004502700.1	81.879	447	73	2	217	1557	20	458	0	717	81	molybdate-anion transporter-like [Cicer arietinum]
Gosto.008G115300-1	XP_013601020.1	82.327	447	72	1	217	1557	20	459	0	717	81	PREDICTED: molybdate-anion transporter-like [Brassica oleracea var. oleracea]
Gosto.008G115300-1	XP_023532428.1	82.998	447	68	2	217	1557	20	458	0	717	81	molybdate-anion transporter [Cucurbita pepo subsp. pepo]
Gosto.008G115300-1	XP_006302235.1	81.514	449	74	2	217	1557	20	461	0	717	81	molybdate-anion transporter [Capsella rubella]
Gosto.008G115300-1	MBA0862550.1	89.387	424	38	1	289	1560	1	417	0	716	77	hypothetical protein [Gossypium schwendimanii]
Gosto.008G115300-1	XP_006285090.2	81.208	447	77	1	217	1557	20	459	0	716	81	molybdate-anion transporter [Capsella rubella]
Gosto.008G115300-1	XP_023550960.1	83.893	447	64	2	217	1557	20	458	0	716	81	molybdate-anion transporter-like [Cucurbita pepo subsp. pepo]
Gosto.008G115300-1	XP_018470366.1	81.655	447	75	1	217	1557	20	459	0	716	81	PREDICTED: molybdate-anion transporter-like [Raphanus sativus]
Gosto.008G115300-1	XP_021805393.1	81.879	447	74	1	217	1557	20	459	0	716	81	molybdate-anion transporter [Prunus avium]
Gosto.008G115300-1	XP_010533550.1	81.737	449	73	2	217	1557	49	490	0	716	81	PREDICTED: molybdate-anion transporter [Tarenaya hassleriana]
Gosto.008G115300-1	XP_019417327.1	82.55	447	70	2	217	1557	20	458	0	716	81	PREDICTED: molybdate-anion transporter-like [Lupinus angustifolius]
Gosto.008G115300-1	VVB11310.1	82.327	447	72	1	217	1557	20	459	0	716	81	unnamed protein product [Arabis nemorensis]
Gosto.008G115300-1	KAF9667288.1	85.714	434	55	1	217	1518	20	446	0	716	79	hypothetical protein SADUNF_Sadunf15G0007000 [Salix dunnii]
Gosto.008G115300-1	XP_013671620.1	82.103	447	73	1	217	1557	20	459	0	716	81	molybdate-anion transporter [Brassica napus]
Gosto.008G115300-1	XP_022922135.1	83.893	447	64	2	217	1557	20	458	0	715	81	molybdate-anion transporter-like [Cucurbita moschata]
Gosto.008G115300-1	XP_018470364.1	81.432	447	76	1	217	1557	20	459	0	715	81	PREDICTED: molybdate-anion transporter-like [Raphanus sativus]
Gosto.008G115300-1	XP_024178106.1	81.655	447	75	1	217	1557	20	459	0	714	81	molybdate-anion transporter-like [Rosa chinensis]
Gosto.008G115300-1	GFP88782.1	83.409	440	66	1	217	1536	20	452	0	714	80	molybdate-anion transporter [Phtheirospermum japonicum]
Gosto.008G115300-1	VDD49975.1	81.655	447	75	1	217	1557	20	459	0	714	81	unnamed protein product [Brassica oleracea]
Gosto.008G115300-1	XP_022738801.1	81.292	449	75	2	217	1557	48	489	0	714	81	molybdate-anion transporter-like isoform X1 [Durio zibethinus]
Gosto.008G115300-1	XP_022974353.1	83.669	447	65	2	217	1557	20	458	0	713	81	molybdate-anion transporter-like [Cucurbita maxima]
Gosto.008G115300-1	XP_013699469.1	81.208	447	77	1	217	1557	20	459	0	713	81	molybdate-anion transporter-like [Brassica napus]
Gosto.008G115300-1	RWR80796.1	81.737	449	73	2	217	1557	20	461	0	713	81	molybdate-anion transporter-like protein [Cinnamomum micranthum f. kanehirae]
Gosto.008G115300-1	ESR54418.1	86.946	429	49	1	217	1503	20	441	0	712	78	hypothetical protein CICLE_v10020083mg [Citrus clementina]
Gosto.008G115300-1	KFK29292.1	82.103	447	73	1	217	1557	20	459	0	712	81	hypothetical protein AALP_AA7G114400 [Arabis alpina]
Gosto.008G115300-1	CAA3005033.1	84.116	447	62	2	217	1557	20	457	0	712	81	molybdate-anion transporter-like [Olea europaea subsp. europaea]
Gosto.008G115300-1	XP_013671621.1	81.432	447	76	1	217	1557	20	459	0	712	81	molybdate-anion transporter [Brassica napus]
Gosto.008G115300-1	KDO59673.1	86.713	429	50	1	217	1503	20	441	0	712	78	hypothetical protein CISIN_1g012629mg [Citrus sinensis]
Gosto.008G115300-1	XP_013673864.1	81.879	447	74	1	217	1557	20	459	0	712	81	molybdate-anion transporter-like [Brassica napus]
Gosto.008G115300-1	AAF19685.1	81.278	454	78	3	217	1557	20	473	0	712	81	F1N19.22 [Arabidopsis thaliana]
Gosto.008G115300-1	KDO59672.1	86.916	428	49	1	217	1500	20	440	0	712	78	hypothetical protein CISIN_1g012629mg [Citrus sinensis]
Gosto.008G115300-1	XP_004134591.1	82.103	447	73	1	217	1557	20	459	0	711	81	molybdate-anion transporter [Cucumis sativus]
Gosto.008G115300-1	XP_038725192.1	81.737	449	73	2	217	1557	20	461	0	711	81	molybdate-anion transporter-like [Tripterygium wilfordii]
Gosto.008G115300-1	XP_009143901.1	81.879	447	74	1	217	1557	20	459	0	711	81	molybdate-anion transporter [Brassica rapa]
Gosto.008G115300-1	XP_009143909.2	80.984	447	78	1	217	1557	20	459	0	711	81	molybdate-anion transporter [Brassica rapa]
Gosto.008G115300-1	VVA93473.1	80.624	449	78	2	217	1557	20	461	0	711	81	unnamed protein product [Arabis nemorensis]
Gosto.008G115300-1	XP_013673933.1	80.984	447	78	1	217	1557	20	459	0	711	81	molybdate-anion transporter [Brassica napus]
Gosto.008G115300-1	XP_019415354.1	81.655	447	74	2	217	1557	20	458	0	711	81	PREDICTED: molybdate-anion transporter-like isoform X2 [Lupinus angustifolius]
Gosto.008G115300-1	GAV68711.1	82.301	452	68	3	217	1557	20	464	0	711	81	DUF791 domain-containing protein [Cephalotus follicularis]
Gosto.008G115300-1	OVA20646.1	81.96	449	72	2	217	1557	20	461	0	711	81	Protein of unknown function DUF791 [Macleaya cordata]
Gosto.008G115300-1	XP_023518880.1	81.655	447	75	1	217	1557	20	459	0	710	81	molybdate-anion transporter-like isoform X1 [Cucurbita pepo subsp. pepo]
Gosto.008G115300-1	KAE9451743.1	77.963	481	65	2	217	1557	20	493	0	710	81	hypothetical protein C3L33_16337, partial [Rhododendron williamsianum]
Gosto.008G115300-1	KAF9833251.1	85.48	427	55	1	217	1497	20	439	0	710	78	hypothetical protein H0E87_002218 [Populus deltoides]
Gosto.008G115300-1	XP_013601027.1	81.655	447	75	1	217	1557	20	459	0	710	81	PREDICTED: molybdate-anion transporter-like [Brassica oleracea var. oleracea]
Gosto.008G115300-1	XP_002518895.1	82.628	449	67	3	217	1557	20	459	0	709	81	molybdate-anion transporter [Ricinus communis]
Gosto.008G115300-1	CAA7031958.1	80.624	449	78	2	217	1557	20	461	0	709	81	unnamed protein product [Microthlaspi erraticum]
Gosto.008G115300-1	XP_010676884.1	78.174	449	88	3	217	1557	20	460	0	709	81	PREDICTED: molybdate-anion transporter [Beta vulgaris subsp. vulgaris]
Gosto.008G115300-1	KDP25194.1	83.073	449	65	3	217	1557	20	459	0	709	81	hypothetical protein JCGZ_20350 [Jatropha curcas]
Gosto.008G115300-1	GFP93678.1	81.757	444	74	1	217	1548	20	456	0	709	81	molybdate-anion transporter [Phtheirospermum japonicum]
Gosto.008G115300-1	XP_021281389.1	80.444	450	79	2	217	1560	20	462	0	709	81	molybdate-anion transporter [Herrania umbratica]
Gosto.008G115300-1	KAF4349658.1	82.103	447	73	1	217	1557	20	459	0	708	81	hypothetical protein F8388_019618 [Cannabis sativa]
Gosto.008G115300-1	EOA23842.1	79.866	447	83	1	217	1557	63	502	0	708	81	hypothetical protein CARUB_v10017059mg, partial [Capsella rubella]
Gosto.008G115300-1	XP_003602305.1	81.208	447	76	2	217	1557	20	458	0	708	81	molybdate-anion transporter [Medicago truncatula]
Gosto.008G115300-1	XP_010426440.1	80.089	447	82	1	217	1557	20	459	0	707	81	PREDICTED: molybdate-anion transporter [Camelina sativa]
Gosto.008G115300-1	XP_028790730.1	84.332	434	61	1	217	1518	20	446	0	707	79	molybdate-anion transporter-like isoform X1 [Prosopis alba]
Gosto.008G115300-1	KAF5743438.1	86.047	430	53	1	217	1506	20	442	0	707	78	hypothetical protein HS088_TW08G00020 [Tripterygium wilfordii]
Gosto.008G115300-1	KAF4350364.1	81.879	447	74	1	217	1557	20	459	0	707	81	hypothetical protein G4B88_030882 [Cannabis sativa]
Gosto.008G115300-1	EOY23921.1	80.624	449	78	2	217	1557	93	534	0	707	81	Major facilitator superfamily protein [Theobroma cacao]
Gosto.008G115300-1	XP_021857127.1	78.842	449	85	3	217	1557	20	460	0	707	81	molybdate-anion transporter-like [Spinacia oleracea]
Gosto.008G115300-1	XP_007039420.2	80.624	449	78	2	217	1557	20	461	0	707	81	PREDICTED: molybdate-anion transporter [Theobroma cacao]
Gosto.008G115300-1	KAA0052502.1	78.891	469	70	2	217	1557	20	481	0	707	81	molybdate-anion transporter-like [Cucumis melo var. makuwa]
Gosto.008G115300-1	KFK32961.1	80.178	449	80	2	217	1557	20	461	0	707	81	hypothetical protein AALP_AA6G312100 [Arabis alpina]
Gosto.008G115300-1	XP_022926956.1	81.208	447	77	1	217	1557	20	459	0	707	81	molybdate-anion transporter-like isoform X1 [Cucurbita moschata]
Gosto.008G115300-1	KAF3432774.1	84.564	447	61	2	217	1557	20	458	0	706	81	hypothetical protein FNV43_RR23876 [Rhamnella rubrinervis]
Gosto.008G115300-1	PIA48836.1	80.624	449	78	2	217	1557	20	461	0	706	81	hypothetical protein AQUCO_01300033v1 [Aquilegia coerulea]
Gosto.008G115300-1	XP_020084301.1	80.178	449	80	2	217	1557	20	461	0	706	81	molybdate-anion transporter-like [Ananas comosus]
Gosto.008G115300-1	XP_006290944.2	79.866	447	83	1	217	1557	20	459	0	706	81	molybdate-anion transporter [Capsella rubella]
Gosto.008G115300-1	NP_190500.2	80.313	447	81	1	217	1557	20	459	0	706	81	Major facilitator superfamily protein [Arabidopsis thaliana]
Gosto.008G115300-1	CAA0385246.1	80.089	447	82	1	217	1557	20	459	0	706	81	unnamed protein product [Arabidopsis thaliana]
Gosto.008G115300-1	OVA14753.1	80.488	451	77	2	217	1557	41	484	0	706	81	Protein of unknown function DUF791 [Macleaya cordata]
Gosto.008G115300-1	XP_018859947.1	81.737	449	72	3	217	1557	20	460	0	706	81	molybdate-anion transporter-like [Juglans regia]
Gosto.008G115300-1	XP_002877664.1	80.313	447	81	1	217	1557	20	459	0	706	81	molybdate-anion transporter [Arabidopsis lyrata subsp. lyrata]
Gosto.008G115300-1	KAE9604038.1	81.432	447	73	2	217	1557	20	456	0	706	81	putative molybdate-anion transporter, major facilitator superfamily domain-containing protein [Lupinus albus]
Gosto.008G115300-1	XP_021757739.1	78.396	449	87	3	217	1557	20	460	0	705	81	molybdate-anion transporter-like [Chenopodium quinoa]
Gosto.008G115300-1	MBA0831120.1	89.423	416	37	1	313	1560	1	409	0	705	76	hypothetical protein [Gossypium armourianum]
Gosto.008G115300-1	OAP06093.1	80.313	447	81	1	217	1557	20	459	0	705	81	hypothetical protein AXX17_AT3G43460 [Arabidopsis thaliana]
Gosto.008G115300-1	XP_006404158.1	80.761	447	79	1	217	1557	20	459	0	705	81	molybdate-anion transporter [Eutrema salsugineum]
Gosto.008G115300-1	KAA0042537.1	85.28	428	56	1	217	1500	20	440	0	705	78	molybdate-anion transporter [Cucumis melo var. makuwa]
Gosto.008G115300-1	XP_009415826.1	79.51	449	83	2	217	1557	20	461	0	705	81	PREDICTED: molybdate-anion transporter [Musa acuminata subsp. malaccensis]
Gosto.008G115300-1	KHN23335.1	85.383	431	56	1	217	1509	20	443	0	704	78	Major facilitator superfamily domain-containing protein 5 [Glycine soja]
Gosto.008G115300-1	XP_004307944.1	80.313	447	81	1	217	1557	20	459	0	704	81	PREDICTED: molybdate-anion transporter [Fragaria vesca subsp. vesca]
Gosto.008G115300-1	MQL70381.1	79.13	460	83	3	217	1590	148	596	0	704	83	hypothetical protein [Colocasia esculenta]
Gosto.008G115300-1	XP_019415355.1	81.432	447	73	3	217	1557	20	456	0	703	81	PREDICTED: molybdate-anion transporter-like isoform X3 [Lupinus angustifolius]
Gosto.008G115300-1	BAF00743.1	80.089	447	82	1	217	1557	20	459	0	703	81	hypothetical protein [Arabidopsis thaliana]
Gosto.008G115300-1	KAF3951292.1	81.111	450	74	3	217	1557	20	461	0	703	81	hypothetical protein CMV_023041 [Castanea mollissima]
Gosto.008G115300-1	TXG50743.1	82.183	449	71	2	217	1557	20	461	0	702	81	hypothetical protein EZV62_023267 [Acer yangbiense]
Gosto.008G115300-1	KAB5524069.1	83.521	443	67	2	217	1527	20	462	0	702	79	hypothetical protein DKX38_021818 [Salix brachista]
Gosto.008G115300-1	XP_031484139.1	79.601	451	80	3	217	1557	20	462	0	702	81	molybdate-anion transporter-like [Nymphaea colorata]
Gosto.008G115300-1	KAF9616434.1	79.287	449	84	2	217	1557	20	461	0	702	81	hypothetical protein IFM89_029688 [Coptis chinensis]
Gosto.008G115300-1	KAF7137235.1	81.004	458	69	4	217	1557	20	470	0	702	81	hypothetical protein RHSIM_Rhsim07G0078400 [Rhododendron simsii]
Gosto.008G115300-1	XP_019415353.1	80	455	75	3	217	1557	20	466	0	702	81	PREDICTED: molybdate-anion transporter-like isoform X1 [Lupinus angustifolius]
Gosto.008G115300-1	AFK42358.1	80.537	447	79	2	217	1557	20	458	0	702	81	unknown [Medicago truncatula]
Gosto.008G115300-1	XP_021604853.1	81.737	449	71	3	217	1557	20	459	0	702	81	molybdate-anion transporter-like [Manihot esculenta]
Gosto.008G115300-1	KAF7816657.1	83.669	447	65	2	217	1557	20	458	0	701	81	molybdate-anion transporter-like [Senna tora]
Gosto.008G115300-1	KAE9459632.1	81.223	458	68	4	217	1557	20	470	0	701	81	hypothetical protein C3L33_08462, partial [Rhododendron williamsianum]
Gosto.008G115300-1	XP_031474340.1	79.823	451	79	3	217	1557	20	462	0	701	81	molybdate-anion transporter-like [Nymphaea colorata]
Gosto.008G115300-1	XP_021767898.1	77.728	449	90	3	217	1557	20	460	0	701	81	molybdate-anion transporter-like [Chenopodium quinoa]
Gosto.008G115300-1	XP_021686914.1	82.405	449	68	3	217	1557	20	459	0	700	81	molybdate-anion transporter-like [Hevea brasiliensis]
Gosto.008G115300-1	XP_030951787.1	80.889	450	75	4	217	1557	20	461	0	699	81	molybdate-anion transporter-like [Quercus lobata]
Gosto.008G115300-1	XP_009387043.1	79.955	449	81	2	217	1557	20	461	0	699	81	PREDICTED: molybdate-anion transporter-like [Musa acuminata subsp. malaccensis]
Gosto.008G115300-1	XP_023904894.1	80.889	450	75	4	217	1557	20	461	0	699	81	molybdate-anion transporter-like [Quercus suber]
Gosto.008G115300-1	XP_018463091.1	80.089	447	82	1	217	1557	20	459	0	699	81	PREDICTED: molybdate-anion transporter-like [Raphanus sativus]
Gosto.008G115300-1	AFP55541.1	77.119	472	83	2	217	1557	20	491	0	699	81	major facilitator superfamily domain [Rosa rugosa]
Gosto.008G115300-1	ONK58860.1	77.106	463	96	3	217	1596	20	475	0	698	84	uncharacterized protein A4U43_C08F480 [Asparagus officinalis]
Gosto.008G115300-1	XP_022035046.1	80.537	447	75	2	217	1557	20	454	0	698	81	molybdate-anion transporter [Helianthus annuus]
Gosto.008G115300-1	XP_010252496.1	81.153	451	74	3	217	1557	20	463	0	698	81	PREDICTED: molybdate-anion transporter-like [Nelumbo nucifera]
Gosto.008G115300-1	KAF3793221.1	79.601	451	80	3	217	1557	20	462	0	698	81	Molybdate-anion transporter [Nymphaea thermarum]
Gosto.008G115300-1	OAY64481.1	79.287	449	74	2	217	1557	20	451	0	698	81	Molybdate-anion transporter [Ananas comosus]
Gosto.008G115300-1	XP_020277338.1	78.842	449	86	2	217	1557	20	461	0	698	81	molybdate-anion transporter-like [Asparagus officinalis]
Gosto.008G115300-1	MQL90770.1	78.842	449	86	2	217	1557	20	461	0	697	81	hypothetical protein [Colocasia esculenta]
Gosto.008G115300-1	XP_013718113.1	79.866	447	83	1	217	1557	20	459	0	697	81	molybdate-anion transporter [Brassica napus]
Gosto.008G115300-1	XP_006439246.1	80.178	449	79	2	217	1557	20	460	0	697	81	molybdate-anion transporter [Citrus clementina]
Gosto.008G115300-1	XP_010934492.1	76.837	449	93	3	217	1557	20	459	0	697	81	molybdate-anion transporter [Elaeis guineensis]
Gosto.008G115300-1	XP_010252339.1	79.065	449	85	2	217	1557	20	461	0	697	81	PREDICTED: molybdate-anion transporter-like [Nelumbo nucifera]
Gosto.008G115300-1	CAD1819037.1	79.065	449	85	2	217	1557	20	461	0	697	81	unnamed protein product [Ananas comosus var. bracteatus]
Gosto.008G115300-1	RVW14918.1	83.146	445	57	2	217	1518	20	457	0	697	79	Molybdate-anion transporter [Vitis vinifera]
Gosto.008G115300-1	XP_020585561.1	80.178	449	80	2	217	1557	20	461	0	697	81	molybdate-anion transporter-like [Phalaenopsis equestris]
Gosto.008G115300-1	XP_020700714.1	80.178	449	80	2	217	1557	20	461	0	697	81	molybdate-anion transporter [Dendrobium catenatum]
Gosto.008G115300-1	XP_026406085.1	79.111	450	84	2	217	1557	20	462	0	697	81	molybdate-anion transporter-like [Papaver somniferum]
Gosto.008G115300-1	XP_026402041.1	79.333	450	83	2	217	1557	20	462	0	697	81	molybdate-anion transporter-like [Papaver somniferum]
Gosto.008G115300-1	VVB05045.1	79.195	447	86	1	217	1557	20	459	0	697	81	unnamed protein product [Arabis nemorensis]
Gosto.008G115300-1	XP_009393576.1	79.287	449	84	2	217	1557	20	461	0	697	81	PREDICTED: molybdate-anion transporter [Musa acuminata subsp. malaccensis]
Gosto.008G115300-1	XP_021684207.1	81.292	449	73	3	217	1557	20	459	0	697	81	molybdate-anion transporter-like [Hevea brasiliensis]
Gosto.008G115300-1	XP_021628237.1	80.846	449	75	3	217	1557	20	459	0	697	81	molybdate-anion transporter-like isoform X1 [Manihot esculenta]
Gosto.008G115300-1	KAF3780030.1	79.157	451	82	3	217	1557	20	462	0	696	81	Molybdate-anion transporter [Nymphaea thermarum]
Gosto.008G115300-1	XP_028077828.1	82.103	447	70	2	217	1557	20	456	0	696	81	molybdate-anion transporter-like [Camellia sinensis]
Gosto.008G115300-1	XP_021972846.1	78.747	447	83	2	217	1557	20	454	0	696	81	molybdate-anion transporter [Helianthus annuus]
Gosto.008G115300-1	XP_013622778.1	79.642	447	84	1	217	1557	20	459	0	696	81	PREDICTED: molybdate-anion transporter-like [Brassica oleracea var. oleracea]
Gosto.008G115300-1	KAD5508218.1	79.866	447	78	2	217	1557	20	454	0	696	81	hypothetical protein E3N88_15921 [Mikania micrantha]
Gosto.008G115300-1	XP_030500558.1	81.208	447	77	1	217	1557	20	459	0	696	81	LOW QUALITY PROTEIN: molybdate-anion transporter-like [Cannabis sativa]
Gosto.008G115300-1	ESQ45612.1	77.97	463	79	2	217	1557	20	475	0	696	81	hypothetical protein EUTSA_v10010332mg [Eutrema salsugineum]
Gosto.008G115300-1	GAY39376.1	79.955	449	80	2	217	1557	2	442	0	695	81	hypothetical protein CUMW_043890 [Citrus unshiu]
Gosto.008G115300-1	ONI07575.1	79.241	448	85	2	217	1560	20	459	0	695	81	hypothetical protein PRUPE_5G128400 [Prunus persica]
Gosto.008G115300-1	KAF3507577.1	77.223	461	91	1	217	1557	20	480	0	694	81	hypothetical protein F2Q69_00005383 [Brassica cretica]
Gosto.008G115300-1	XP_020096330.1	78.842	449	86	2	217	1557	20	461	0	694	81	molybdate-anion transporter-like [Ananas comosus]
Gosto.008G115300-1	XP_023742394.1	80.089	447	78	2	217	1557	20	455	0	694	81	molybdate-anion transporter-like [Lactuca sativa]
Gosto.008G115300-1	XP_034895834.1	79.51	449	83	2	217	1557	20	461	0	694	81	molybdate-anion transporter-like [Populus alba]
Gosto.008G115300-1	OAY75526.1	78.842	449	86	2	217	1557	20	461	0	694	81	Molybdate-anion transporter [Ananas comosus]
Gosto.008G115300-1	KVI10213.1	82.143	448	73	1	217	1560	66	506	0	694	81	Major facilitator superfamily domain, general substrate transporter [Cynara cardunculus var. scolymus]
Gosto.008G115300-1	XP_031117240.1	81.879	447	74	1	217	1557	20	459	0	694	81	molybdate-anion transporter [Ipomoea triloba]
Gosto.008G115300-1	XP_016694897.1	79.065	449	85	2	217	1557	20	461	0	693	81	PREDICTED: molybdate-anion transporter-like [Gossypium hirsutum]
Gosto.008G115300-1	KAB2069770.1	78.842	449	86	2	217	1557	20	461	0	693	81	hypothetical protein ES319_A08G113500v1 [Gossypium barbadense]
Gosto.008G115300-1	XP_009358691.1	80	450	80	3	217	1560	20	461	0	693	81	PREDICTED: molybdate-anion transporter-like [Pyrus x bretschneideri]
Gosto.008G115300-1	TYH06014.1	78.619	449	87	2	217	1557	20	461	0	693	81	hypothetical protein ES288_A08G124700v1 [Gossypium darwinii]
Gosto.008G115300-1	EOA17988.1	83.178	428	65	1	217	1500	20	440	0	693	78	hypothetical protein CARUB_v10006423mg, partial [Capsella rubella]
Gosto.008G115300-1	TYI69162.1	79.065	449	85	2	217	1557	20	461	0	693	81	hypothetical protein E1A91_D08G135000v1 [Gossypium mustelinum]
Gosto.008G115300-1	XP_008374105.1	80.222	450	79	3	217	1560	20	461	0	693	81	molybdate-anion transporter-like [Malus domestica]
Gosto.008G115300-1	XP_017631145.1	78.842	449	86	2	217	1557	20	461	0	693	81	PREDICTED: molybdate-anion transporter-like [Gossypium arboreum]
Gosto.008G115300-1	XP_021816572.1	79.333	450	83	3	217	1560	20	461	0	692	81	molybdate-anion transporter-like [Prunus avium]
Gosto.008G115300-1	XP_012474787.1	79.065	449	85	2	217	1557	20	461	0	692	81	PREDICTED: molybdate-anion transporter-like [Gossypium raimondii]
Gosto.008G115300-1	XP_026425173.1	78.936	451	84	2	217	1557	20	463	0	692	81	molybdate-anion transporter-like [Papaver somniferum]
Gosto.008G115300-1	XP_019195531.1	81.655	447	75	1	217	1557	20	459	0	692	81	PREDICTED: molybdate-anion transporter [Ipomoea nil]
Gosto.008G115300-1	XP_016735349.1	78.619	449	87	2	217	1557	20	461	0	692	81	PREDICTED: molybdate-anion transporter-like [Gossypium hirsutum]
Gosto.008G115300-1	XP_031267973.1	80.178	449	79	3	217	1557	20	460	0	692	81	molybdate-anion transporter-like [Pistacia vera]
Gosto.008G115300-1	XP_024971964.1	82.143	448	73	1	217	1560	20	460	0	692	81	molybdate-anion transporter [Cynara cardunculus var. scolymus]
Gosto.008G115300-1	XP_031262767.1	80.178	449	79	3	217	1557	20	460	0	692	81	molybdate-anion transporter-like isoform X2 [Pistacia vera]
Gosto.008G115300-1	XP_006849199.1	79.556	450	80	3	217	1557	20	460	0	692	81	molybdate-anion transporter isoform X1 [Amborella trichopoda]
Gosto.008G115300-1	TYH58229.1	78.842	449	86	2	217	1557	20	461	0	691	81	hypothetical protein ES332_D08G138800v1 [Gossypium tomentosum]
Gosto.008G115300-1	XP_002304575.2	79.51	449	83	2	217	1557	20	461	0	691	81	molybdate-anion transporter [Populus trichocarpa]
Gosto.008G115300-1	PQM41654.1	79.556	450	82	3	217	1560	20	461	0	691	81	molybdate-anion transporter-like [Prunus yedoensis var. nudiflora]
Gosto.008G115300-1	XP_007211182.1	79.111	450	84	3	217	1560	20	461	0	691	81	molybdate-anion transporter [Prunus persica]
Gosto.008G115300-1	KAG0497831.1	79.733	449	82	2	217	1557	20	461	0	691	81	hypothetical protein HPP92_002522 [Vanilla planifolia]
Gosto.008G115300-1	KAB2017027.1	78.842	449	86	2	217	1557	20	461	0	691	81	hypothetical protein ES319_D08G132100v1 [Gossypium barbadense]
Gosto.008G115300-1	CAD5325290.1	75.63	476	80	2	217	1557	20	488	0	691	81	unnamed protein product [Arabidopsis thaliana]
Gosto.008G115300-1	KAG0484808.1	79.733	449	82	2	217	1557	20	461	0	690	81	hypothetical protein HPP92_008887 [Vanilla planifolia]
Gosto.008G115300-1	PHT40546.1	78.971	447	87	1	217	1557	20	459	0	690	81	hypothetical protein CQW23_19400 [Capsicum baccatum]
Gosto.008G115300-1	KAF9860409.1	79.733	449	82	2	217	1557	20	461	0	690	81	hypothetical protein H0E87_030128 [Populus deltoides]
Gosto.008G115300-1	XP_024169378.1	80.222	450	79	3	217	1560	20	461	0	690	81	molybdate-anion transporter-like [Rosa chinensis]
Gosto.008G115300-1	CAB4100951.1	78.971	447	82	2	217	1557	20	454	0	690	81	unnamed protein product [Lactuca saligna]
Gosto.008G115300-1	XP_026441277.1	78.492	451	86	2	217	1557	20	463	0	689	81	molybdate-anion transporter-like [Papaver somniferum]
Gosto.008G115300-1	XP_008239240.1	79.333	450	83	3	217	1560	20	461	0	689	81	PREDICTED: molybdate-anion transporter-like [Prunus mume]
Gosto.008G115300-1	XP_008806366.1	79.065	449	85	2	217	1557	20	461	0	689	81	molybdate-anion transporter [Phoenix dactylifera]
Gosto.008G115300-1	PWA44747.1	78.348	448	85	2	217	1560	20	455	0	689	81	molybdate-anion transporter, Major facilitator superfamily domain protein [Artemisia annua]
Gosto.008G115300-1	XP_023733050.1	78.747	447	83	2	217	1557	20	454	0	689	81	molybdate-anion transporter-like [Lactuca sativa]
Gosto.008G115300-1	KAF9671067.1	80.752	452	56	2	217	1500	20	464	0	688	78	hypothetical protein SADUNF_Sadunf12G0008200 [Salix dunnii]
Gosto.008G115300-1	XP_017243143.1	82.366	448	72	1	217	1560	20	460	0	688	81	PREDICTED: molybdate-anion transporter [Daucus carota subsp. sativus]
Gosto.008G115300-1	XP_008803061.1	78.396	449	88	2	217	1557	20	461	0	687	81	molybdate-anion transporter-like [Phoenix dactylifera]
Gosto.008G115300-1	CAB4102961.1	79.642	447	80	2	217	1557	20	455	0	687	81	unnamed protein product [Lactuca saligna]
Gosto.008G115300-1	KAB1215535.1	79.51	449	82	3	217	1557	20	460	0	687	81	Molybdate-anion transporter [Morella rubra]
Gosto.008G115300-1	KAG0486592.1	79.51	449	83	2	217	1557	20	461	0	687	81	hypothetical protein HPP92_008687 [Vanilla planifolia]
Gosto.008G115300-1	GFY83402.1	80.761	447	56	2	217	1557	20	436	0	685	81	major facilitator superfamily protein [Actinidia rufa]
Gosto.008G115300-1	PWA95736.1	81.696	448	75	1	217	1560	20	460	0	684	81	major facilitator superfamily protein [Artemisia annua]
Gosto.008G115300-1	XP_009351951.1	80.984	447	78	1	217	1557	20	459	0	684	81	PREDICTED: molybdate-anion transporter-like [Pyrus x bretschneideri]
Gosto.008G115300-1	PWA53099.1	78.971	447	83	2	217	1557	20	455	0	684	81	molybdate-anion transporter, Major facilitator superfamily domain protein [Artemisia annua]
Gosto.008G115300-1	KAF3322452.1	77.778	450	90	2	217	1557	20	462	0	684	81	molybdate-anion transporter-like protein [Carex littledalei]
Gosto.008G115300-1	XP_019099698.1	73.566	488	81	2	217	1557	20	500	0	684	81	PREDICTED: molybdate-anion transporter [Camelina sativa]
Gosto.008G115300-1	XP_023740718.1	81.596	451	73	2	217	1560	20	463	0	684	81	molybdate-anion transporter [Lactuca sativa]
Gosto.008G115300-1	XP_019200317.1	81.432	447	76	1	217	1557	20	459	0	684	81	PREDICTED: molybdate-anion transporter-like [Ipomoea nil]
Gosto.008G115300-1	XP_010941032.1	77.728	449	91	2	217	1557	20	461	0	683	81	molybdate-anion transporter isoform X1 [Elaeis guineensis]
Gosto.008G115300-1	XP_011022428.1	79.733	449	82	2	217	1557	20	461	0	682	81	PREDICTED: molybdate-anion transporter-like [Populus euphratica]
Gosto.008G115300-1	KMZ68225.1	77.556	450	91	3	217	1557	20	462	0	682	81	Major facilitator superfamily domain-containing protein [Zostera marina]
Gosto.008G115300-1	OMO79847.1	78.747	447	87	2	217	1554	20	459	0	682	81	Plastocyanin-like protein [Corchorus capsularis]
Gosto.008G115300-1	OAY56283.1	82.517	429	68	1	217	1503	20	441	0	682	78	hypothetical protein MANES_02G003800 [Manihot esculenta]
Gosto.008G115300-1	THG10738.1	83.45	429	64	1	217	1503	20	441	0	682	78	hypothetical protein TEA_023114 [Camellia sinensis var. sinensis]
Gosto.008G115300-1	GEU88919.1	77.009	448	91	2	217	1560	20	455	0	681	81	molybdate-anion transporter [Tanacetum cinerariifolium]
Gosto.008G115300-1	ABR17540.1	77.333	450	92	2	217	1557	20	462	0	681	81	unknown [Picea sitchensis]
Gosto.008G115300-1	KAG1359218.1	78.174	449	89	2	217	1557	20	461	0	681	81	molybdate-anion transporter [Cocos nucifera]
Gosto.008G115300-1	OIV98031.1	78.076	447	75	2	217	1557	20	443	0	681	81	hypothetical protein TanjilG_12262 [Lupinus angustifolius]
Gosto.008G115300-1	XP_024996923.1	78.125	448	86	3	217	1560	20	455	0	681	81	molybdate-anion transporter-like isoform X1 [Cynara cardunculus var. scolymus]
Gosto.008G115300-1	PWA68779.1	78.523	447	85	2	217	1557	20	455	0	681	81	molybdate-anion transporter, Major facilitator superfamily domain protein [Artemisia annua]
Gosto.008G115300-1	XP_022033941.1	80.804	448	79	1	217	1560	20	460	0	680	81	molybdate-anion transporter [Helianthus annuus]
Gosto.008G115300-1	XP_006661963.1	75.391	447	99	3	217	1557	20	455	0	679	81	PREDICTED: molybdate-anion transporter [Oryza brachyantha]
Gosto.008G115300-1	EAY88269.1	75.615	447	99	3	217	1557	20	456	0	679	81	hypothetical protein OsI_09722 [Oryza sativa Indica Group]
Gosto.008G115300-1	XP_031095918.1	80.984	447	78	1	217	1557	20	459	0	679	81	molybdate-anion transporter-like [Ipomoea triloba]
Gosto.008G115300-1	CAA2986877.1	84.412	417	58	1	307	1557	7	416	0	678	76	molybdate-anion transporter-like [Olea europaea subsp. europaea]
Gosto.008G115300-1	KAF5181961.1	81.119	429	74	1	217	1503	20	441	0	678	78	Molybdate-anion transporter, Major facilitator superfamily domain protein [Thalictrum thalictroides]
Gosto.008G115300-1	XP_009599532.1	80.537	447	80	1	217	1557	20	459	0	677	81	molybdate-anion transporter [Nicotiana tomentosiformis]
Gosto.008G115300-1	XP_025794942.1	75.391	447	100	3	217	1557	20	456	0	677	81	molybdate-anion transporter-like [Panicum hallii]
Gosto.008G115300-1	XP_009398088.1	77.06	449	94	2	217	1557	20	461	0	677	81	PREDICTED: molybdate-anion transporter-like [Musa acuminata subsp. malaccensis]
Gosto.008G115300-1	KAB2069769.1	78.733	442	85	2	217	1536	20	454	0	677	80	hypothetical protein ES319_A08G113500v1 [Gossypium barbadense]
Gosto.008G115300-1	PNY09127.1	80.761	447	78	2	217	1557	20	458	0	676	81	major facilitator superfamily domain-containing protein 5-like [Trifolium pratense]
Gosto.008G115300-1	MBA0763271.1	74.737	475	85	4	217	1557	20	487	0	676	81	hypothetical protein [Gossypium trilobum]
Gosto.008G115300-1	XP_009757796.1	80.089	447	82	1	217	1557	20	459	0	676	81	PREDICTED: molybdate-anion transporter [Nicotiana sylvestris]
Gosto.008G115300-1	OMP02832.1	77.951	449	75	2	217	1557	20	446	0	676	81	hypothetical protein COLO4_10782 [Corchorus olitorius]
Gosto.008G115300-1	XP_019240292.1	80.537	447	80	1	217	1557	20	459	0	676	81	PREDICTED: molybdate-anion transporter-like [Nicotiana attenuata]
Gosto.008G115300-1	XP_004986003.1	75.615	447	99	3	217	1557	20	456	0	676	81	molybdate-anion transporter [Setaria italica]
Gosto.008G115300-1	KAF3434205.1	82.051	429	70	1	217	1503	20	441	0	676	78	hypothetical protein FNV43_RR25308 [Rhamnella rubrinervis]
Gosto.008G115300-1	XP_015632211.1	75.391	447	100	3	217	1557	20	456	0	675	81	molybdate-anion transporter [Oryza sativa Japonica Group]
Gosto.008G115300-1	XP_016468196.1	79.866	447	83	1	217	1557	20	459	0	675	81	PREDICTED: molybdate-anion transporter-like [Nicotiana tabacum]
Gosto.008G115300-1	XP_030501335.1	76.392	449	96	3	217	1557	20	460	0	674	81	molybdate-anion transporter [Cannabis sativa]
Gosto.008G115300-1	XP_006476306.1	79.287	449	83	2	217	1557	20	460	0	674	81	molybdate-anion transporter-like [Citrus sinensis]
Gosto.008G115300-1	XP_015614895.1	74.944	447	101	3	217	1557	20	455	0	674	81	molybdate-anion transporter [Oryza sativa Japonica Group]
Gosto.008G115300-1	PKU73703.1	72.581	496	80	3	217	1557	20	508	0	672	81	hypothetical protein MA16_Dca013284 [Dendrobium catenatum]
Gosto.008G115300-1	GAU35156.1	80.313	447	80	2	217	1557	20	458	0	672	81	hypothetical protein TSUD_217890 [Trifolium subterraneum]
Gosto.008G115300-1	KAF4351085.1	76.169	449	97	3	217	1557	20	460	0	672	81	hypothetical protein F8388_013190 [Cannabis sativa]
Gosto.008G115300-1	XP_006359771.1	78.747	447	88	1	217	1557	20	459	0	672	81	PREDICTED: molybdate-anion transporter-like [Solanum tuberosum]
Gosto.008G115300-1	ABB47893.2	74.72	447	101	3	217	1557	20	454	0	672	81	Major Facilitator Superfamily protein, expressed [Oryza sativa Japonica Group]
Gosto.008G115300-1	XP_020243431.1	79.065	449	85	2	217	1557	20	461	0	672	81	molybdate-anion transporter-like [Asparagus officinalis]
Gosto.008G115300-1	KAF0916162.1	74.944	447	102	3	217	1557	20	456	0	671	81	hypothetical protein E2562_000758 [Oryza meyeriana var. granulata]
Gosto.008G115300-1	TQD79368.1	81.862	419	69	1	301	1557	1	412	0	671	76	hypothetical protein C1H46_035062 [Malus baccata]
Gosto.008G115300-1	XP_004982589.1	74.72	447	102	3	217	1557	20	455	0	671	81	molybdate-anion transporter [Setaria italica]
Gosto.008G115300-1	XP_031262766.1	80.886	429	75	1	217	1503	20	441	0	671	78	molybdate-anion transporter-like isoform X1 [Pistacia vera]
Gosto.008G115300-1	RLN15816.1	74.72	447	102	3	217	1557	20	455	0	670	81	molybdate-anion transporter [Panicum miliaceum]
Gosto.008G115300-1	VFQ65423.1	79.955	449	80	3	217	1560	20	459	0	670	81	unnamed protein product [Cuscuta campestris]
Gosto.008G115300-1	XP_027368634.1	83.055	419	63	2	301	1557	1	411	0	670	76	molybdate-anion transporter-like isoform X2 [Abrus precatorius]
Gosto.008G115300-1	XP_004309548.1	78.319	452	87	2	217	1560	20	464	0	670	81	PREDICTED: molybdate-anion transporter-like [Fragaria vesca subsp. vesca]
Gosto.008G115300-1	RAL46351.1	79.955	449	80	3	217	1560	20	459	0	670	81	hypothetical protein DM860_015344 [Cuscuta australis]
Gosto.008G115300-1	TMW92577.1	78.3	447	90	1	217	1557	20	459	0	670	81	hypothetical protein EJD97_012833 [Solanum chilense]
Gosto.008G115300-1	KAF8780374.1	74.72	447	103	3	217	1557	20	456	0	670	81	hypothetical protein HU200_001486 [Digitaria exilis]
Gosto.008G115300-1	PON73566.1	77.283	449	92	3	217	1557	20	460	0	670	81	Molybdate-anion transporter [Parasponia andersonii]
Gosto.008G115300-1	XP_021303322.1	74.944	447	102	3	217	1557	20	456	0	669	81	molybdate-anion transporter-like isoform X1 [Sorghum bicolor]
Gosto.008G115300-1	XP_021303325.1	74.72	447	102	3	217	1557	20	455	0	669	81	molybdate-anion transporter-like isoform X2 [Sorghum bicolor]
Gosto.008G115300-1	XP_017258512.1	81.25	448	77	1	217	1560	20	460	0	669	81	PREDICTED: molybdate-anion transporter-like [Daucus carota subsp. sativus]
Gosto.008G115300-1	XP_015085546.1	78.3	447	90	1	217	1557	20	459	0	669	81	molybdate-anion transporter-like [Solanum pennellii]
Gosto.008G115300-1	KAF0930455.1	73.826	447	106	3	217	1557	20	455	0	669	81	hypothetical protein E2562_032884 [Oryza meyeriana var. granulata]
Gosto.008G115300-1	OEL29845.1	74.72	447	103	3	217	1557	20	456	0	669	81	Molybdate-anion transporter [Dichanthelium oligosanthes]
Gosto.008G115300-1	PHU09342.1	79.418	447	85	1	217	1557	20	459	0	669	81	hypothetical protein BC332_21202 [Capsicum chinense]
Gosto.008G115300-1	XP_024986304.1	79.195	447	81	2	217	1557	20	454	0	669	81	molybdate-anion transporter-like [Cynara cardunculus var. scolymus]
Gosto.008G115300-1	KAF4389447.1	75.947	449	98	3	217	1557	20	460	0	669	81	hypothetical protein G4B88_006506 [Cannabis sativa]
Gosto.008G115300-1	ACG34533.1	74.72	447	104	3	217	1557	20	457	0	669	81	major Facilitator superfamily protein [Zea mays]
Gosto.008G115300-1	KAF8780245.1	74.497	447	104	3	217	1557	20	456	0	669	81	hypothetical protein HU200_001915 [Digitaria exilis]
Gosto.008G115300-1	PON92822.1	76.392	449	96	3	217	1557	20	460	0	669	81	Molybdate-anion transporter [Trema orientale]
Gosto.008G115300-1	NP_001335057.1	74.72	447	103	3	217	1557	20	456	0	668	81	molybdate-anion transporter precursor [Zea mays]
Gosto.008G115300-1	MBA0862549.1	90.38	395	31	1	217	1401	20	407	0	668	72	hypothetical protein [Gossypium schwendimanii]
Gosto.008G115300-1	RLN38766.1	74.049	447	105	3	217	1557	20	455	0	668	81	hypothetical protein C2845_PM01G37160 [Panicum miliaceum]
Gosto.008G115300-1	ONL92907.1	74.72	447	103	3	217	1557	89	525	0	668	81	Major facilitator superfamily protein [Zea mays]
Gosto.008G115300-1	NP_001309245.1	78.3	447	90	1	217	1557	20	459	0	668	81	molybdate-anion transporter precursor [Solanum lycopersicum]
Gosto.008G115300-1	NP_001149961.1	74.72	447	104	3	217	1557	20	457	0	668	81	uncharacterized protein LOC100283588 precursor [Zea mays]
Gosto.008G115300-1	XP_024017579.1	77.283	449	92	3	217	1557	20	460	0	668	81	molybdate-anion transporter [Morus notabilis]
Gosto.008G115300-1	CAB66410.1	73.109	476	85	2	217	1557	20	481	0	667	81	putative protein [Arabidopsis thaliana]
Gosto.008G115300-1	XP_025791490.1	74.273	447	104	3	217	1557	20	455	0	667	81	molybdate-anion transporter-like [Panicum hallii]
Gosto.008G115300-1	XP_003558980.1	73.602	447	108	3	217	1557	20	456	0	667	81	molybdate-anion transporter [Brachypodium distachyon]
Gosto.008G115300-1	XP_008672796.1	74.049	447	105	3	217	1557	20	455	0	667	81	uncharacterized protein LOC100191861 isoform X1 [Zea mays]
Gosto.008G115300-1	XP_016537838.1	78.971	447	87	1	217	1557	20	459	0	667	81	PREDICTED: molybdate-anion transporter [Capsicum annuum]
Gosto.008G115300-1	TVU31978.1	74.049	447	105	3	217	1557	20	455	0	666	81	hypothetical protein EJB05_23694 [Eragrostis curvula]
Gosto.008G115300-1	RXI08228.1	75.949	474	80	2	217	1557	20	486	0	666	81	hypothetical protein DVH24_022372 [Malus domestica]
Gosto.008G115300-1	MBA0559384.1	85.817	416	37	2	313	1560	1	394	0	665	76	hypothetical protein [Gossypium lobatum]
Gosto.008G115300-1	XP_015690279.1	74.72	447	103	3	217	1557	20	456	0	665	81	PREDICTED: molybdate-anion transporter-like [Oryza brachyantha]
Gosto.008G115300-1	KAF9685976.1	78.636	440	87	1	217	1536	20	452	0	665	80	hypothetical protein SADUNF_Sadunf03G0110600 [Salix dunnii]
Gosto.008G115300-1	XP_022888828.1	81.71	421	70	1	295	1557	17	430	0	664	76	molybdate-anion transporter-like, partial [Olea europaea var. sylvestris]
Gosto.008G115300-1	KZN00208.1	84.075	427	61	1	217	1497	20	439	0	664	78	hypothetical protein DCAR_008962 [Daucus carota subsp. sativus]
Gosto.008G115300-1	XP_002466934.1	73.602	447	107	3	217	1557	20	455	0	663	81	molybdate-anion transporter isoform X1 [Sorghum bicolor]
Gosto.008G115300-1	XP_009389334.1	75.947	449	98	3	217	1557	20	460	0	663	81	PREDICTED: molybdate-anion transporter-like [Musa acuminata subsp. malaccensis]
Gosto.008G115300-1	KJB52532.1	90.127	395	32	1	217	1401	20	407	0	662	72	hypothetical protein B456_008G266400 [Gossypium raimondii]
Gosto.008G115300-1	XP_025612656.1	82.254	417	66	2	307	1557	4	412	0	662	76	molybdate-anion transporter isoform X2 [Arachis hypogaea]
Gosto.008G115300-1	PWZ57118.1	75.463	432	98	2	217	1512	20	443	0	662	78	hypothetical protein Zm00014a_008902 [Zea mays]
Gosto.008G115300-1	XP_020192186.1	73.826	447	105	4	217	1557	20	454	0	662	81	molybdate-anion transporter [Aegilops tauschii subsp. tauschii]
Gosto.008G115300-1	XP_021306870.1	73.378	447	106	3	217	1557	20	453	0	662	81	molybdate-anion transporter isoform X2 [Sorghum bicolor]
Gosto.008G115300-1	KAE8814462.1	73.826	447	105	4	217	1557	20	454	0	661	81	molybdate-anion transporter-like [Hordeum vulgare]
Gosto.008G115300-1	KJB39448.1	89.873	395	33	1	217	1401	20	407	0	661	72	hypothetical protein B456_007G016500 [Gossypium raimondii]
Gosto.008G115300-1	ONL92908.1	75.991	429	95	2	217	1503	20	440	0	661	78	Major facilitator superfamily protein [Zea mays]
Gosto.008G115300-1	XP_029150297.1	82.014	417	67	2	307	1557	4	412	0	661	76	molybdate-anion transporter isoform X2 [Arachis hypogaea]
Gosto.008G115300-1	PKA66319.1	77.876	452	76	2	217	1521	20	464	0	661	79	hypothetical protein AXF42_Ash007016 [Apostasia shenzhenica]
Gosto.008G115300-1	QHN93657.1	81.623	419	69	2	301	1557	1	411	0	661	76	Molybdate-anion transporter [Arachis hypogaea]
Gosto.008G115300-1	ONL92904.1	76.224	429	94	2	217	1503	20	440	0	661	78	Major facilitator superfamily protein [Zea mays]
Gosto.008G115300-1	AQL09965.1	75.694	432	97	2	217	1512	20	443	0	660	78	Major Facilitator family protein [Zea mays]
Gosto.008G115300-1	KAF6994991.1	73.602	447	105	4	217	1557	20	453	0	660	81	hypothetical protein CFC21_011574 [Triticum aestivum]
Gosto.008G115300-1	KAB5564652.1	78.507	442	86	2	217	1536	20	454	0	660	80	hypothetical protein DKX38_004706 [Salix brachista]
Gosto.008G115300-1	MBA0554025.1	76.615	449	84	3	217	1557	20	449	0	660	81	hypothetical protein [Gossypium lobatum]
Gosto.008G115300-1	PLY67240.1	80	430	72	2	217	1506	20	435	0	660	78	hypothetical protein LSAT_6X82260 [Lactuca sativa]
Gosto.008G115300-1	KAF2585886.1	81.1	418	72	1	304	1557	1	411	0	660	76	hypothetical protein F2Q70_00035246 [Brassica cretica]
Gosto.008G115300-1	KAF8722223.1	72.931	447	110	3	217	1557	20	455	0	659	81	hypothetical protein HU200_022531 [Digitaria exilis]
Gosto.008G115300-1	PWZ05085.1	76.761	426	91	2	217	1494	20	437	0	659	77	Molybdate-anion transporter [Zea mays]
Gosto.008G115300-1	KAE8661971.1	88.55	393	38	1	217	1395	20	405	0	659	71	Rhodanese/Cell cycle control phosphatase superfamily protein isoform 1 [Hibiscus syriacus]
Gosto.008G115300-1	KAD5507456.1	73.739	476	84	3	217	1557	20	483	0	659	81	hypothetical protein E3N88_15159 [Mikania micrantha]
Gosto.008G115300-1	NP_001077772.1	81.146	419	70	2	307	1557	9	420	0	659	76	Major facilitator superfamily protein [Arabidopsis thaliana]
Gosto.008G115300-1	XP_037409434.1	73.826	447	105	4	217	1557	20	454	0	659	81	molybdate-anion transporter-like [Triticum dicoccoides]
Gosto.008G115300-1	KAF7043706.1	73.602	447	105	4	217	1557	20	453	0	657	81	hypothetical protein CFC21_053029 [Triticum aestivum]
Gosto.008G115300-1	XP_003574207.1	74.049	447	104	4	217	1557	20	454	0	657	81	molybdate-anion transporter [Brachypodium distachyon]
Gosto.008G115300-1	VAH05311.1	73.602	447	104	4	217	1557	20	452	0	657	81	unnamed protein product [Triticum turgidum subsp. durum]
Gosto.005G384700-1	MBA0661034.1	93.103	174	12	0	676	1197	1	174	8.78e-108	335	69	hypothetical protein [Gossypium klotzschianum]
Gosto.005G384700-1	MBA0661034.1	84.302	172	25	1	1441	1956	1	170	1.48e-82	269	69	hypothetical protein [Gossypium klotzschianum]
Gosto.005G384700-1	MBA0661034.1	70	80	22	1	394	633	13	90	2.27e-25	114	69	hypothetical protein [Gossypium klotzschianum]
Gosto.005G384700-1	MBA0661034.1	61.702	94	31	2	1117	1398	2	90	1.5e-24	112	69	hypothetical protein [Gossypium klotzschianum]
Gosto.005G384700-1	XP_017645563.1	94.706	170	9	0	676	1185	1	170	1.16e-106	332	69	PREDICTED: dirigent protein 4-like [Gossypium arboreum]
Gosto.005G384700-1	XP_017645563.1	85.465	172	23	1	1441	1956	1	170	1.05e-83	272	69	PREDICTED: dirigent protein 4-like [Gossypium arboreum]
Gosto.005G384700-1	XP_017645563.1	73.75	80	19	1	394	633	13	90	3.88e-27	119	69	PREDICTED: dirigent protein 4-like [Gossypium arboreum]
Gosto.005G384700-1	XP_017645563.1	64.894	94	28	2	1117	1398	2	90	2.68e-26	117	69	PREDICTED: dirigent protein 4-like [Gossypium arboreum]
Gosto.005G384700-1	KAB2086154.1	94.706	170	9	0	676	1185	1	170	1.33e-106	332	69	hypothetical protein ES319_A04G009200v1 [Gossypium barbadense]
Gosto.005G384700-1	KAB2086154.1	85.465	172	23	1	1441	1956	1	170	1.32e-83	272	69	hypothetical protein ES319_A04G009200v1 [Gossypium barbadense]
Gosto.005G384700-1	KAB2086154.1	73.75	80	19	1	394	633	13	90	3.99e-27	119	69	hypothetical protein ES319_A04G009200v1 [Gossypium barbadense]
Gosto.005G384700-1	KAB2086154.1	64.894	94	28	2	1117	1398	2	90	2.65e-26	117	69	hypothetical protein ES319_A04G009200v1 [Gossypium barbadense]
Gosto.005G384700-1	TYH75026.1	82.09	201	34	1	601	1197	16	216	2.43e-106	332	73	hypothetical protein ES332_D05G444600v1 [Gossypium tomentosum]
Gosto.005G384700-1	TYH75026.1	88.83	188	21	0	1393	1956	25	212	2.81e-101	319	73	hypothetical protein ES332_D05G444600v1 [Gossypium tomentosum]
Gosto.005G384700-1	TYH75026.1	78.75	80	17	0	394	633	53	132	9.06e-31	131	73	hypothetical protein ES332_D05G444600v1 [Gossypium tomentosum]
Gosto.005G384700-1	TYH75026.1	69.149	94	26	1	1117	1398	42	132	3.67e-29	127	73	hypothetical protein ES332_D05G444600v1 [Gossypium tomentosum]
Gosto.005G384700-1	TYJ38690.1	94.118	170	10	0	676	1185	1	170	4.3e-106	330	69	hypothetical protein E1A91_A04G009600v1 [Gossypium mustelinum]
Gosto.005G384700-1	TYJ38690.1	84.884	172	24	1	1441	1956	1	170	4e-83	271	69	hypothetical protein E1A91_A04G009600v1 [Gossypium mustelinum]
Gosto.005G384700-1	TYJ38690.1	72.5	80	20	1	394	633	13	90	1.13e-26	118	69	hypothetical protein E1A91_A04G009600v1 [Gossypium mustelinum]
Gosto.005G384700-1	TYJ38690.1	63.83	94	29	2	1117	1398	2	90	7.43e-26	116	69	hypothetical protein E1A91_A04G009600v1 [Gossypium mustelinum]
Gosto.005G384700-1	XP_012443948.1	94.118	170	10	0	676	1185	1	170	5.88e-106	330	69	PREDICTED: dirigent protein 4-like [Gossypium raimondii]
Gosto.005G384700-1	XP_012443948.1	86.628	172	21	1	1441	1956	1	170	2.64e-85	276	69	PREDICTED: dirigent protein 4-like [Gossypium raimondii]
Gosto.005G384700-1	XP_012443948.1	73.75	80	19	1	394	633	13	90	1.31e-26	118	69	PREDICTED: dirigent protein 4-like [Gossypium raimondii]
Gosto.005G384700-1	XP_012443948.1	64.894	94	28	2	1117	1398	2	90	6.48e-26	116	69	PREDICTED: dirigent protein 4-like [Gossypium raimondii]
Gosto.005G384700-1	KAB2033035.1	91.379	174	15	0	676	1197	1	174	1.14e-105	329	70	hypothetical protein ES319_D05G420200v1 [Gossypium barbadense]
Gosto.005G384700-1	KAB2033035.1	85.057	174	24	1	1441	1962	1	172	4.54e-85	276	70	hypothetical protein ES319_D05G420200v1 [Gossypium barbadense]
Gosto.005G384700-1	KAB2033035.1	72.5	80	20	1	394	633	13	90	3.62e-26	117	70	hypothetical protein ES319_D05G420200v1 [Gossypium barbadense]
Gosto.005G384700-1	KAB2033035.1	64.894	94	28	2	1117	1398	2	90	4.35e-26	116	70	hypothetical protein ES319_D05G420200v1 [Gossypium barbadense]
Gosto.005G384700-1	TYH75030.1	93.529	170	11	0	676	1185	1	170	2e-105	328	69	hypothetical protein ES332_D05G445000v1 [Gossypium tomentosum]
Gosto.005G384700-1	TYH75030.1	86.047	172	22	1	1441	1956	1	170	8.51e-85	275	69	hypothetical protein ES332_D05G445000v1 [Gossypium tomentosum]
Gosto.005G384700-1	TYH75030.1	72.5	80	20	1	394	633	13	90	3.73e-26	117	69	hypothetical protein ES332_D05G445000v1 [Gossypium tomentosum]
Gosto.005G384700-1	TYH75030.1	64.894	94	28	2	1117	1398	2	90	4.4e-26	116	69	hypothetical protein ES332_D05G445000v1 [Gossypium tomentosum]
Gosto.005G384700-1	MBA0776914.1	93.529	170	11	0	676	1185	1	170	4.43e-105	328	69	hypothetical protein [Gossypium trilobum]
Gosto.005G384700-1	MBA0776914.1	84.884	172	24	1	1441	1956	1	170	1.25e-82	270	69	hypothetical protein [Gossypium trilobum]
Gosto.005G384700-1	MBA0776914.1	72.5	80	20	1	394	633	13	90	1.54e-25	115	69	hypothetical protein [Gossypium trilobum]
Gosto.005G384700-1	MBA0776914.1	63.83	94	29	2	1117	1398	2	90	8.38e-25	113	69	hypothetical protein [Gossypium trilobum]
Gosto.005G384700-1	XP_016684500.1	92.941	170	12	0	676	1185	1	170	4.83e-105	327	69	PREDICTED: dirigent protein 4-like [Gossypium hirsutum]
Gosto.005G384700-1	XP_016684500.1	86.628	172	21	1	1441	1956	1	170	2.64e-85	276	69	PREDICTED: dirigent protein 4-like [Gossypium hirsutum]
Gosto.005G384700-1	XP_016684500.1	73.75	80	19	1	394	633	13	90	1.31e-26	118	69	PREDICTED: dirigent protein 4-like [Gossypium hirsutum]
Gosto.005G384700-1	XP_016684500.1	65.957	94	27	2	1117	1398	2	90	1.51e-26	118	69	PREDICTED: dirigent protein 4-like [Gossypium hirsutum]
Gosto.005G384700-1	MBA0722124.1	92.941	170	12	0	676	1185	1	170	1.27e-104	327	69	hypothetical protein [Gossypium laxum]
Gosto.005G384700-1	MBA0722124.1	85.465	172	23	1	1441	1956	1	170	6.43e-84	273	69	hypothetical protein [Gossypium laxum]
Gosto.005G384700-1	MBA0722124.1	73.418	79	19	1	394	630	13	89	3.29e-26	117	69	hypothetical protein [Gossypium laxum]
Gosto.005G384700-1	MBA0722124.1	64.516	93	28	2	1117	1395	2	89	1.66e-25	115	69	hypothetical protein [Gossypium laxum]
Gosto.005G384700-1	MBA0661026.1	90.23	174	17	0	676	1197	1	174	1.31e-104	326	69	hypothetical protein [Gossypium klotzschianum]
Gosto.005G384700-1	MBA0661026.1	83.14	172	27	1	1441	1956	1	170	4.33e-82	268	69	hypothetical protein [Gossypium klotzschianum]
Gosto.005G384700-1	MBA0661026.1	64.894	94	28	2	1117	1398	2	90	3.45e-26	117	69	hypothetical protein [Gossypium klotzschianum]
Gosto.005G384700-1	MBA0661026.1	71.25	80	21	1	394	633	13	90	4.25e-25	114	69	hypothetical protein [Gossypium klotzschianum]
Gosto.005G384700-1	PPR94060.1	90.23	174	17	0	676	1197	1	174	2.66e-104	325	69	hypothetical protein GOBAR_AA26626 [Gossypium barbadense]
Gosto.005G384700-1	PPR94060.1	87.791	172	19	1	1441	1956	1	170	3.97e-87	281	69	hypothetical protein GOBAR_AA26626 [Gossypium barbadense]
Gosto.005G384700-1	PPR94060.1	73.75	80	19	1	394	633	13	90	3.92e-27	119	69	hypothetical protein GOBAR_AA26626 [Gossypium barbadense]
Gosto.005G384700-1	PPR94060.1	64.894	94	28	2	1117	1398	2	90	2.04e-26	117	69	hypothetical protein GOBAR_AA26626 [Gossypium barbadense]
Gosto.005G384700-1	TYG72084.1	92.941	170	12	0	676	1185	1	170	4.01e-104	325	69	hypothetical protein ES288_D05G451700v1 [Gossypium darwinii]
Gosto.005G384700-1	TYG72084.1	85.465	172	23	1	1441	1956	1	170	1.73e-83	271	69	hypothetical protein ES288_D05G451700v1 [Gossypium darwinii]
Gosto.005G384700-1	TYG72084.1	71.25	80	21	1	394	633	13	90	6.58e-25	113	69	hypothetical protein ES288_D05G451700v1 [Gossypium darwinii]
Gosto.005G384700-1	TYG72084.1	63.83	94	29	2	1117	1398	2	90	8.71e-25	113	69	hypothetical protein ES288_D05G451700v1 [Gossypium darwinii]
Gosto.005G384700-1	MBA0661033.1	90.23	174	17	0	676	1197	1	174	5.41e-104	325	69	hypothetical protein [Gossypium klotzschianum]
Gosto.005G384700-1	MBA0661033.1	83.14	172	27	1	1441	1956	1	170	2e-80	264	69	hypothetical protein [Gossypium klotzschianum]
Gosto.005G384700-1	MBA0661033.1	62.766	94	30	2	1117	1398	2	90	4.61e-24	110	69	hypothetical protein [Gossypium klotzschianum]
Gosto.005G384700-1	MBA0661033.1	68.75	80	23	1	394	633	13	90	5.81e-24	110	69	hypothetical protein [Gossypium klotzschianum]
Gosto.005G384700-1	KJB62876.1	90.23	174	17	0	676	1197	1	174	7.08e-104	325	69	hypothetical protein B456_009G447400 [Gossypium raimondii]
Gosto.005G384700-1	KJB62876.1	84.302	172	25	1	1441	1956	1	170	4.72e-84	273	69	hypothetical protein B456_009G447400 [Gossypium raimondii]
Gosto.005G384700-1	KJB62876.1	64.894	94	28	2	1117	1398	2	90	2.1e-27	120	69	hypothetical protein B456_009G447400 [Gossypium raimondii]
Gosto.005G384700-1	KJB62876.1	72.5	80	20	1	394	633	13	90	1.21e-26	118	69	hypothetical protein B456_009G447400 [Gossypium raimondii]
Gosto.005G384700-1	XP_016718364.1	90.23	174	17	0	676	1197	1	174	7.31e-104	324	69	PREDICTED: dirigent protein 4-like [Gossypium hirsutum]
Gosto.005G384700-1	XP_016718364.1	86.628	172	21	1	1441	1956	1	170	1.09e-86	280	69	PREDICTED: dirigent protein 4-like [Gossypium hirsutum]
Gosto.005G384700-1	XP_016718364.1	73.75	80	19	1	394	633	13	90	3.84e-27	119	69	PREDICTED: dirigent protein 4-like [Gossypium hirsutum]
Gosto.005G384700-1	XP_016718364.1	64.894	94	28	2	1117	1398	2	90	1.96e-26	117	69	PREDICTED: dirigent protein 4-like [Gossypium hirsutum]
Gosto.005G384700-1	KAB2086150.1	89.655	174	18	0	676	1197	1	174	1.04e-103	324	69	hypothetical protein ES319_A04G008800v1 [Gossypium barbadense]
Gosto.005G384700-1	KAB2086150.1	87.209	172	20	1	1441	1956	1	170	1.46e-86	280	69	hypothetical protein ES319_A04G008800v1 [Gossypium barbadense]
Gosto.005G384700-1	KAB2086150.1	73.75	80	19	1	394	633	13	90	3.99e-27	119	69	hypothetical protein ES319_A04G008800v1 [Gossypium barbadense]
Gosto.005G384700-1	KAB2086150.1	64.894	94	28	2	1117	1398	2	90	2.08e-26	117	69	hypothetical protein ES319_A04G008800v1 [Gossypium barbadense]
Gosto.005G384700-1	KAB2086151.1	89.655	174	18	0	676	1197	1	174	1.73e-103	323	69	hypothetical protein ES319_A04G008900v1 [Gossypium barbadense]
Gosto.005G384700-1	KAB2086151.1	87.209	172	20	1	1441	1956	1	170	3.53e-87	281	69	hypothetical protein ES319_A04G008900v1 [Gossypium barbadense]
Gosto.005G384700-1	KAB2086151.1	73.75	80	19	1	394	633	13	90	3.73e-27	119	69	hypothetical protein ES319_A04G008900v1 [Gossypium barbadense]
Gosto.005G384700-1	KAB2086151.1	64.894	94	28	2	1117	1398	2	90	1.93e-26	117	69	hypothetical protein ES319_A04G008900v1 [Gossypium barbadense]
Gosto.005G384700-1	XP_012443951.1	89.655	174	18	0	676	1197	1	174	5.69e-103	322	69	PREDICTED: dirigent protein 4-like [Gossypium raimondii]
Gosto.005G384700-1	XP_012443951.1	82.558	172	28	1	1441	1956	1	170	1.38e-79	261	69	PREDICTED: dirigent protein 4-like [Gossypium raimondii]
Gosto.005G384700-1	XP_012443951.1	62.766	94	30	2	1117	1398	2	90	8.88e-25	113	69	PREDICTED: dirigent protein 4-like [Gossypium raimondii]
Gosto.005G384700-1	XP_012443951.1	67.5	80	24	1	394	633	13	90	3.87e-23	108	69	PREDICTED: dirigent protein 4-like [Gossypium raimondii]
Gosto.005G384700-1	MBA0625454.1	89.655	174	18	0	676	1197	1	174	2.47e-102	320	69	hypothetical protein [Gossypium davidsonii]
Gosto.005G384700-1	MBA0625454.1	85.465	172	23	1	1441	1956	1	170	5.9e-84	273	69	hypothetical protein [Gossypium davidsonii]
Gosto.005G384700-1	MBA0625454.1	64.894	94	28	2	1117	1398	2	90	7.43e-26	116	69	hypothetical protein [Gossypium davidsonii]
Gosto.005G384700-1	MBA0625454.1	71.25	80	21	1	394	633	13	90	1.19e-25	115	69	hypothetical protein [Gossypium davidsonii]
Gosto.005G384700-1	XP_017643660.1	88.506	174	20	0	676	1197	1	174	4.97e-102	320	69	PREDICTED: dirigent protein 4-like [Gossypium arboreum]
Gosto.005G384700-1	XP_017643660.1	86.628	172	21	1	1441	1956	1	170	1.23e-86	280	69	PREDICTED: dirigent protein 4-like [Gossypium arboreum]
Gosto.005G384700-1	XP_017643660.1	72.5	80	20	1	394	633	13	90	1.08e-26	118	69	PREDICTED: dirigent protein 4-like [Gossypium arboreum]
Gosto.005G384700-1	XP_017643660.1	63.83	94	29	2	1117	1398	2	90	5.94e-26	116	69	PREDICTED: dirigent protein 4-like [Gossypium arboreum]
Gosto.005G384700-1	XP_017646546.1	89.655	174	18	0	676	1197	1	174	7.97e-102	319	69	PREDICTED: dirigent protein 4-like [Gossypium arboreum]
Gosto.005G384700-1	XP_017646546.1	84.302	172	25	1	1441	1956	1	170	1.43e-83	272	69	PREDICTED: dirigent protein 4-like [Gossypium arboreum]
Gosto.005G384700-1	XP_017646546.1	71.25	80	21	1	394	633	13	90	1.63e-25	115	69	PREDICTED: dirigent protein 4-like [Gossypium arboreum]
Gosto.005G384700-1	XP_017646546.1	63.83	94	29	2	1117	1398	2	90	2.04e-25	114	69	PREDICTED: dirigent protein 4-like [Gossypium arboreum]
Gosto.005G384700-1	XP_017642909.1	91.765	170	14	0	676	1185	1	170	8.87e-102	319	69	PREDICTED: dirigent protein 4-like [Gossypium arboreum]
Gosto.005G384700-1	XP_017642909.1	83.721	172	26	1	1441	1956	1	170	5.89e-82	268	69	PREDICTED: dirigent protein 4-like [Gossypium arboreum]
Gosto.005G384700-1	XP_017642909.1	72.973	74	18	1	412	633	19	90	8.46e-25	113	69	PREDICTED: dirigent protein 4-like [Gossypium arboreum]
Gosto.005G384700-1	XP_017642909.1	58.511	94	34	2	1117	1398	2	90	3.01e-22	105	69	PREDICTED: dirigent protein 4-like [Gossypium arboreum]
Gosto.005G384700-1	MBA0661024.1	87.931	174	21	0	676	1197	1	174	1.21e-101	319	69	hypothetical protein [Gossypium klotzschianum]
Gosto.005G384700-1	MBA0661024.1	83.14	172	27	1	1441	1956	1	170	2.63e-82	268	69	hypothetical protein [Gossypium klotzschianum]
Gosto.005G384700-1	MBA0661024.1	65.957	94	27	2	1117	1398	2	90	7.51e-27	119	69	hypothetical protein [Gossypium klotzschianum]
Gosto.005G384700-1	MBA0661024.1	71.25	80	21	1	394	633	13	90	3.37e-25	114	69	hypothetical protein [Gossypium klotzschianum]
Gosto.005G384700-1	XP_016718368.1	88.506	174	20	0	676	1197	1	174	1.71e-101	318	69	PREDICTED: dirigent protein 4-like [Gossypium hirsutum]
Gosto.005G384700-1	XP_016718368.1	83.14	172	27	1	1441	1956	1	170	2.99e-81	266	69	PREDICTED: dirigent protein 4-like [Gossypium hirsutum]
Gosto.005G384700-1	XP_016718368.1	62.766	94	30	2	1117	1398	2	90	1.78e-25	115	69	PREDICTED: dirigent protein 4-like [Gossypium hirsutum]
Gosto.005G384700-1	XP_016718368.1	67.5	80	24	1	394	633	13	90	8.16e-24	110	69	PREDICTED: dirigent protein 4-like [Gossypium hirsutum]
Gosto.005G384700-1	XP_016731193.1	89.08	174	19	0	676	1197	1	174	2.16e-101	318	69	PREDICTED: dirigent protein 4-like [Gossypium hirsutum]
Gosto.005G384700-1	XP_016731193.1	83.721	172	26	1	1441	1956	1	170	4e-83	271	69	PREDICTED: dirigent protein 4-like [Gossypium hirsutum]
Gosto.005G384700-1	XP_016731193.1	70	80	22	1	394	633	13	90	3.61e-25	114	69	PREDICTED: dirigent protein 4-like [Gossypium hirsutum]
Gosto.005G384700-1	XP_016731193.1	62.766	94	30	2	1117	1398	2	90	4.42e-25	114	69	PREDICTED: dirigent protein 4-like [Gossypium hirsutum]
Gosto.005G384700-1	XP_017647810.1	87.931	174	21	0	676	1197	1	174	2.21e-101	318	69	PREDICTED: dirigent protein 4-like [Gossypium arboreum]
Gosto.005G384700-1	XP_017647810.1	83.14	172	27	1	1441	1956	1	170	2.44e-82	269	69	PREDICTED: dirigent protein 4-like [Gossypium arboreum]
Gosto.005G384700-1	XP_017647810.1	64.894	94	28	2	1117	1398	2	90	1.14e-26	118	69	PREDICTED: dirigent protein 4-like [Gossypium arboreum]
Gosto.005G384700-1	XP_017647810.1	71.25	80	21	1	394	633	13	90	8.3e-25	113	69	PREDICTED: dirigent protein 4-like [Gossypium arboreum]
Gosto.005G384700-1	XP_016731187.1	87.931	174	21	0	676	1197	1	174	3.11e-101	318	69	PREDICTED: dirigent protein 4-like [Gossypium hirsutum]
Gosto.005G384700-1	XP_016731187.1	84.302	172	25	1	1441	1956	1	170	2.7e-83	271	69	PREDICTED: dirigent protein 4-like [Gossypium hirsutum]
Gosto.005G384700-1	XP_016731187.1	65.957	94	27	2	1117	1398	2	90	4.15e-27	119	69	PREDICTED: dirigent protein 4-like [Gossypium hirsutum]
Gosto.005G384700-1	XP_016731187.1	72.5	80	20	1	394	633	13	90	3.12e-25	114	69	PREDICTED: dirigent protein 4-like [Gossypium hirsutum]
Gosto.005G384700-1	TYI31797.1	91.176	170	15	0	676	1185	1	170	4.73e-101	317	69	hypothetical protein ES332_A04G010200v1 [Gossypium tomentosum]
Gosto.005G384700-1	TYI31797.1	83.14	172	27	1	1441	1956	1	170	3.29e-81	266	69	hypothetical protein ES332_A04G010200v1 [Gossypium tomentosum]
Gosto.005G384700-1	TYI31797.1	72.973	74	18	1	412	633	19	90	8.88e-25	113	69	hypothetical protein ES332_A04G010200v1 [Gossypium tomentosum]
Gosto.005G384700-1	TYI31797.1	58.511	94	34	2	1117	1398	2	90	3.22e-22	105	69	hypothetical protein ES332_A04G010200v1 [Gossypium tomentosum]
Gosto.005G384700-1	TYH75034.1	87.356	174	22	0	676	1197	1	174	7.51e-101	317	69	hypothetical protein ES332_D05G445400v1 [Gossypium tomentosum]
Gosto.005G384700-1	TYH75034.1	85.465	172	23	1	1441	1956	1	170	1.79e-84	274	69	hypothetical protein ES332_D05G445400v1 [Gossypium tomentosum]
Gosto.005G384700-1	TYH75034.1	70	80	22	1	394	633	13	90	1.04e-24	112	69	hypothetical protein ES332_D05G445400v1 [Gossypium tomentosum]
Gosto.005G384700-1	TYH75034.1	61.702	94	31	2	1117	1398	2	90	9.71e-24	110	69	hypothetical protein ES332_D05G445400v1 [Gossypium tomentosum]
Gosto.005G384700-1	TYI31805.1	89.08	174	19	0	676	1197	1	174	9.5e-101	317	69	hypothetical protein ES332_A04G011000v1 [Gossypium tomentosum]
Gosto.005G384700-1	TYI31805.1	83.721	172	26	1	1441	1956	1	170	1.93e-82	269	69	hypothetical protein ES332_A04G011000v1 [Gossypium tomentosum]
Gosto.005G384700-1	TYI31805.1	71.25	80	21	1	394	633	13	90	1.04e-25	115	69	hypothetical protein ES332_A04G011000v1 [Gossypium tomentosum]
Gosto.005G384700-1	TYI31805.1	63.83	94	29	2	1117	1398	2	90	1.44e-25	115	69	hypothetical protein ES332_A04G011000v1 [Gossypium tomentosum]
Gosto.005G384700-1	XP_012443945.1	88.506	174	20	0	676	1197	1	174	1.19e-100	316	69	PREDICTED: dirigent protein 4-like [Gossypium raimondii]
Gosto.005G384700-1	XP_012443945.1	84.302	172	25	1	1441	1956	1	170	1.18e-82	270	69	PREDICTED: dirigent protein 4-like [Gossypium raimondii]
Gosto.005G384700-1	XP_012443945.1	63.83	94	29	2	1117	1398	2	90	1.77e-24	112	69	PREDICTED: dirigent protein 4-like [Gossypium raimondii]
Gosto.005G384700-1	XP_012443945.1	70	80	22	1	394	633	13	90	2.23e-24	112	69	PREDICTED: dirigent protein 4-like [Gossypium raimondii]
Gosto.005G384700-1	XP_017644936.1	87.931	174	21	0	676	1197	1	174	1.66e-100	316	69	PREDICTED: dirigent protein 4-like [Gossypium arboreum]
Gosto.005G384700-1	XP_017644936.1	82.558	172	28	1	1441	1956	1	170	3.29e-80	263	69	PREDICTED: dirigent protein 4-like [Gossypium arboreum]
Gosto.005G384700-1	XP_017644936.1	62.766	94	30	2	1117	1398	2	90	1.46e-25	115	69	PREDICTED: dirigent protein 4-like [Gossypium arboreum]
Gosto.005G384700-1	XP_017644936.1	67.5	80	24	1	394	633	13	90	5.81e-24	110	69	PREDICTED: dirigent protein 4-like [Gossypium arboreum]
Gosto.005G384700-1	MBA0879829.1	87.931	174	21	0	676	1197	1	174	1.79e-100	316	69	hypothetical protein [Gossypium schwendimanii]
Gosto.005G384700-1	MBA0879829.1	83.14	172	27	1	1441	1956	1	170	5.33e-83	270	69	hypothetical protein [Gossypium schwendimanii]
Gosto.005G384700-1	MBA0879829.1	65.957	94	27	2	1117	1398	2	90	4.35e-26	116	69	hypothetical protein [Gossypium schwendimanii]
Gosto.005G384700-1	MBA0879829.1	74.359	78	18	1	400	633	15	90	4.35e-26	116	69	hypothetical protein [Gossypium schwendimanii]
Gosto.005G384700-1	MBA0661038.1	89.412	170	18	0	676	1185	1	170	3.19e-100	315	69	hypothetical protein [Gossypium klotzschianum]
Gosto.005G384700-1	MBA0661038.1	86.628	172	21	1	1441	1956	1	170	1.43e-84	275	69	hypothetical protein [Gossypium klotzschianum]
Gosto.005G384700-1	MBA0661038.1	70	80	22	1	394	633	13	90	5.08e-24	110	69	hypothetical protein [Gossypium klotzschianum]
Gosto.005G384700-1	MBA0661038.1	61.702	94	31	2	1117	1398	2	90	2.98e-23	108	69	hypothetical protein [Gossypium klotzschianum]
Gosto.005G384700-1	XP_012443946.1	87.931	174	21	0	676	1197	1	174	5.7e-100	314	69	PREDICTED: dirigent protein 4-like [Gossypium raimondii]
Gosto.005G384700-1	XP_012443946.1	83.14	172	27	1	1441	1956	1	170	1.97e-82	269	69	PREDICTED: dirigent protein 4-like [Gossypium raimondii]
Gosto.005G384700-1	XP_012443946.1	65.957	94	27	2	1117	1398	2	90	1.57e-26	118	69	PREDICTED: dirigent protein 4-like [Gossypium raimondii]
Gosto.005G384700-1	XP_012443946.1	73.077	78	19	1	400	633	15	90	4.82e-25	114	69	PREDICTED: dirigent protein 4-like [Gossypium raimondii]
Gosto.005G384700-1	MBA0625455.1	87.429	175	21	1	676	1197	1	175	1.01e-99	314	69	hypothetical protein [Gossypium davidsonii]
Gosto.005G384700-1	MBA0625455.1	82.558	172	29	1	1441	1956	1	171	9.61e-82	267	69	hypothetical protein [Gossypium davidsonii]
Gosto.005G384700-1	MBA0625455.1	63.83	94	30	2	1117	1398	2	91	5.39e-26	116	69	hypothetical protein [Gossypium davidsonii]
Gosto.005G384700-1	MBA0625455.1	68.75	80	24	1	394	633	13	91	2.57e-24	111	69	hypothetical protein [Gossypium davidsonii]
Gosto.005G384700-1	XP_012443947.1	81.675	191	33	1	631	1197	8	198	1.51e-99	314	75	PREDICTED: dirigent protein 4-like [Gossypium raimondii]
Gosto.005G384700-1	XP_012443947.1	80.423	189	33	2	1396	1956	8	194	1.89e-86	280	75	PREDICTED: dirigent protein 4-like [Gossypium raimondii]
Gosto.005G384700-1	XP_012443947.1	66.25	80	25	1	394	633	37	114	6.05e-23	107	75	PREDICTED: dirigent protein 4-like [Gossypium raimondii]
Gosto.005G384700-1	XP_012443947.1	76.19	21	5	0	350	412	23	43	6.05e-23	33.1	75	PREDICTED: dirigent protein 4-like [Gossypium raimondii]
Gosto.005G384700-1	XP_012443947.1	59.574	94	33	2	1117	1398	26	114	3.71e-22	106	75	PREDICTED: dirigent protein 4-like [Gossypium raimondii]
Gosto.005G384700-1	TYJ38689.1	86.782	174	23	0	676	1197	1	174	3.68e-99	312	69	hypothetical protein E1A91_A04G009500v1 [Gossypium mustelinum]
Gosto.005G384700-1	TYJ38689.1	81.395	172	30	1	1441	1956	1	170	6.14e-79	260	69	hypothetical protein E1A91_A04G009500v1 [Gossypium mustelinum]
Gosto.005G384700-1	TYJ38689.1	61.702	94	31	2	1117	1398	2	90	6.27e-25	113	69	hypothetical protein E1A91_A04G009500v1 [Gossypium mustelinum]
Gosto.005G384700-1	TYJ38689.1	66.25	80	25	1	394	633	13	90	2.56e-23	108	69	hypothetical protein E1A91_A04G009500v1 [Gossypium mustelinum]
Gosto.005G384700-1	XP_016684988.1	86.207	174	24	0	676	1197	1	174	7.01e-98	309	69	PREDICTED: dirigent protein 4-like [Gossypium hirsutum]
Gosto.005G384700-1	XP_016684988.1	85.465	172	23	1	1441	1956	1	170	2.57e-82	268	69	PREDICTED: dirigent protein 4-like [Gossypium hirsutum]
Gosto.005G384700-1	XP_016684988.1	67.5	80	24	1	394	633	13	90	1.44e-21	103	69	PREDICTED: dirigent protein 4-like [Gossypium hirsutum]
Gosto.005G384700-1	XP_016684988.1	59.574	94	33	2	1117	1398	2	90	2.03e-20	100	69	PREDICTED: dirigent protein 4-like [Gossypium hirsutum]
Gosto.005G384700-1	XP_012443941.1	80.628	191	35	1	631	1197	8	198	1.18e-97	309	73	PREDICTED: dirigent protein 4-like isoform X1 [Gossypium raimondii]
Gosto.005G384700-1	XP_012443941.1	79.894	189	34	2	1396	1956	8	194	1.6e-85	278	73	PREDICTED: dirigent protein 4-like isoform X1 [Gossypium raimondii]
Gosto.005G384700-1	XP_012443941.1	65.823	79	25	1	394	630	37	113	1.68e-21	104	73	PREDICTED: dirigent protein 4-like isoform X1 [Gossypium raimondii]
Gosto.005G384700-1	XP_012443941.1	58.065	93	34	2	1117	1395	26	113	5.4e-21	103	73	PREDICTED: dirigent protein 4-like isoform X1 [Gossypium raimondii]
Gosto.005G384700-1	XP_012443950.1	85.714	175	24	1	676	1197	1	175	1.49e-97	308	69	PREDICTED: dirigent protein 4-like [Gossypium raimondii]
Gosto.005G384700-1	XP_012443950.1	84.971	173	23	2	1441	1956	1	171	2.72e-81	266	69	PREDICTED: dirigent protein 4-like [Gossypium raimondii]
Gosto.005G384700-1	XP_012443950.1	66.667	81	24	2	394	633	13	91	6.67e-21	102	69	PREDICTED: dirigent protein 4-like [Gossypium raimondii]
Gosto.005G384700-1	XP_012443950.1	58.947	95	33	3	1117	1398	2	91	2.68e-20	100	69	PREDICTED: dirigent protein 4-like [Gossypium raimondii]
Gosto.005G384700-1	MBA0864413.1	85.714	175	24	1	676	1197	1	175	5.74e-97	306	69	hypothetical protein [Gossypium schwendimanii]
Gosto.005G384700-1	MBA0864413.1	84.393	173	24	2	1441	1956	1	171	6.23e-80	262	69	hypothetical protein [Gossypium schwendimanii]
Gosto.005G384700-1	MBA0864413.1	69.136	81	22	2	394	633	13	91	6.08e-22	105	69	hypothetical protein [Gossypium schwendimanii]
Gosto.005G384700-1	MBA0864413.1	61.053	95	31	3	1117	1398	2	91	1.52e-21	103	69	hypothetical protein [Gossypium schwendimanii]
Gosto.005G384700-1	XP_016752896.1	79.144	187	37	1	643	1197	11	197	9.62e-97	307	73	PREDICTED: dirigent protein 4-like [Gossypium hirsutum]
Gosto.005G384700-1	XP_016752896.1	81.967	183	33	0	1408	1956	11	193	3.6e-90	290	73	PREDICTED: dirigent protein 4-like [Gossypium hirsutum]
Gosto.005G384700-1	XP_016752896.1	73.75	80	21	0	394	633	34	113	1.05e-28	125	73	PREDICTED: dirigent protein 4-like [Gossypium hirsutum]
Gosto.005G384700-1	XP_016752896.1	62.766	94	32	1	1117	1398	23	113	1.6e-25	115	73	PREDICTED: dirigent protein 4-like [Gossypium hirsutum]
Gosto.005G384700-1	KAB2033039.1	84.091	176	26	1	676	1197	1	176	1.11e-96	306	69	hypothetical protein ES319_D05G420600v1 [Gossypium barbadense]
Gosto.005G384700-1	KAB2033039.1	88.953	172	19	0	1441	1956	1	172	6.08e-91	291	69	hypothetical protein ES319_D05G420600v1 [Gossypium barbadense]
Gosto.005G384700-1	KAB2033039.1	83.784	74	12	0	412	633	19	92	2.73e-31	131	69	hypothetical protein ES319_D05G420600v1 [Gossypium barbadense]
Gosto.005G384700-1	KAB2033039.1	65.957	94	29	1	1117	1398	2	92	5.95e-29	125	69	hypothetical protein ES319_D05G420600v1 [Gossypium barbadense]
Gosto.005G384700-1	KAB2086149.1	84.091	176	26	1	676	1197	1	176	3.06e-96	305	69	hypothetical protein ES319_A04G008700v1 [Gossypium barbadense]
Gosto.005G384700-1	KAB2086149.1	88.953	172	19	0	1441	1956	1	172	6.55e-91	291	69	hypothetical protein ES319_A04G008700v1 [Gossypium barbadense]
Gosto.005G384700-1	KAB2086149.1	78.75	80	17	0	394	633	13	92	1.19e-31	132	69	hypothetical protein ES319_A04G008700v1 [Gossypium barbadense]
Gosto.005G384700-1	KAB2086149.1	68.085	94	27	1	1117	1398	2	92	7.75e-30	127	69	hypothetical protein ES319_A04G008700v1 [Gossypium barbadense]
Gosto.005G384700-1	MBA0776916.1	83.523	176	27	1	676	1197	1	176	3.63e-96	305	69	hypothetical protein [Gossypium trilobum]
Gosto.005G384700-1	MBA0776916.1	88.372	172	20	0	1441	1956	1	172	1.61e-90	290	69	hypothetical protein [Gossypium trilobum]
Gosto.005G384700-1	MBA0776916.1	83.784	74	12	0	412	633	19	92	3.04e-31	131	69	hypothetical protein [Gossypium trilobum]
Gosto.005G384700-1	MBA0776916.1	65.957	94	29	1	1117	1398	2	92	5.61e-29	125	69	hypothetical protein [Gossypium trilobum]
Gosto.005G384700-1	XP_017644635.1	83.523	176	27	1	676	1197	1	176	3.95e-96	305	69	PREDICTED: dirigent protein 4-like [Gossypium arboreum]
Gosto.005G384700-1	XP_017644635.1	88.372	172	20	0	1441	1956	1	172	7.06e-91	291	69	PREDICTED: dirigent protein 4-like [Gossypium arboreum]
Gosto.005G384700-1	XP_017644635.1	81.25	80	15	0	394	633	13	92	8.06e-33	135	69	PREDICTED: dirigent protein 4-like [Gossypium arboreum]
Gosto.005G384700-1	XP_017644635.1	68.085	94	27	1	1117	1398	2	92	7.9e-30	127	69	PREDICTED: dirigent protein 4-like [Gossypium arboreum]
Gosto.005G384700-1	XP_012443952.1	84.091	176	26	1	676	1197	1	176	6.54e-96	304	69	PREDICTED: dirigent protein 4-like [Gossypium raimondii]
Gosto.005G384700-1	XP_012443952.1	88.953	172	19	0	1441	1956	1	172	7.21e-91	291	69	PREDICTED: dirigent protein 4-like [Gossypium raimondii]
Gosto.005G384700-1	XP_012443952.1	83.784	74	12	0	412	633	19	92	2.9e-31	131	69	PREDICTED: dirigent protein 4-like [Gossypium raimondii]
Gosto.005G384700-1	XP_012443952.1	83.099	71	12	0	1186	1398	22	92	1.21e-28	124	69	PREDICTED: dirigent protein 4-like [Gossypium raimondii]
Gosto.005G384700-1	XP_016684989.1	83.523	176	27	1	676	1197	1	176	8.73e-96	303	69	PREDICTED: dirigent protein 4-like [Gossypium hirsutum]
Gosto.005G384700-1	XP_016684989.1	88.372	172	20	0	1441	1956	1	172	4.52e-90	289	69	PREDICTED: dirigent protein 4-like [Gossypium hirsutum]
Gosto.005G384700-1	XP_016684989.1	83.784	74	12	0	412	633	19	92	2.95e-31	131	69	PREDICTED: dirigent protein 4-like [Gossypium hirsutum]
Gosto.005G384700-1	XP_016684989.1	65.957	94	29	1	1117	1398	2	92	6.37e-29	125	69	PREDICTED: dirigent protein 4-like [Gossypium hirsutum]
Gosto.005G384700-1	TYH21040.1	83.523	176	27	1	676	1197	1	176	1.51e-95	303	69	hypothetical protein ES288_A04G010700v1 [Gossypium darwinii]
Gosto.005G384700-1	TYH21040.1	88.372	172	20	0	1441	1956	1	172	2.83e-90	289	69	hypothetical protein ES288_A04G010700v1 [Gossypium darwinii]
Gosto.005G384700-1	TYH21040.1	80	80	16	0	394	633	13	92	3.01e-32	134	69	hypothetical protein ES288_A04G010700v1 [Gossypium darwinii]
Gosto.005G384700-1	TYH21040.1	67.021	94	28	1	1117	1398	2	92	3.01e-29	125	69	hypothetical protein ES288_A04G010700v1 [Gossypium darwinii]
Gosto.005G384700-1	XP_016718405.1	82.955	176	28	1	676	1197	1	176	2.46e-95	302	70	PREDICTED: dirigent protein 4-like [Gossypium hirsutum]
Gosto.005G384700-1	XP_016718405.1	86.782	174	23	0	1441	1962	1	174	5.2e-90	289	70	PREDICTED: dirigent protein 4-like [Gossypium hirsutum]
Gosto.005G384700-1	XP_016718405.1	80	80	16	0	394	633	13	92	2.86e-32	134	70	PREDICTED: dirigent protein 4-like [Gossypium hirsutum]
Gosto.005G384700-1	XP_016718405.1	67.021	94	28	1	1117	1398	2	92	2.84e-29	125	70	PREDICTED: dirigent protein 4-like [Gossypium hirsutum]
Gosto.005G384700-1	TYI85362.1	82.955	176	28	1	676	1197	1	176	2.8e-95	302	69	hypothetical protein E1A91_D05G435900v1 [Gossypium mustelinum]
Gosto.005G384700-1	TYI85362.1	87.791	172	21	0	1441	1956	1	172	9.15e-90	288	69	hypothetical protein E1A91_D05G435900v1 [Gossypium mustelinum]
Gosto.005G384700-1	TYI85362.1	83.784	74	12	0	412	633	19	92	2.92e-31	131	69	hypothetical protein E1A91_D05G435900v1 [Gossypium mustelinum]
Gosto.005G384700-1	TYI85362.1	64.894	94	30	1	1117	1398	2	92	1.03e-28	124	69	hypothetical protein E1A91_D05G435900v1 [Gossypium mustelinum]
Gosto.005G384700-1	MBA0776917.1	83.523	176	27	1	676	1197	1	176	3.66e-95	302	69	hypothetical protein [Gossypium trilobum]
Gosto.005G384700-1	MBA0776917.1	88.953	172	19	0	1441	1956	1	172	7.69e-91	291	69	hypothetical protein [Gossypium trilobum]
Gosto.005G384700-1	MBA0776917.1	83.784	74	12	0	412	633	19	92	2.65e-31	131	69	hypothetical protein [Gossypium trilobum]
Gosto.005G384700-1	MBA0776917.1	65.957	94	29	1	1117	1398	2	92	5.3e-29	125	69	hypothetical protein [Gossypium trilobum]
Gosto.005G384700-1	TYI31796.1	82.955	176	28	1	676	1197	1	176	6.53e-95	301	69	hypothetical protein ES332_A04G010100v1 [Gossypium tomentosum]
Gosto.005G384700-1	TYI31796.1	87.791	172	21	0	1441	1956	1	172	1.19e-89	288	69	hypothetical protein ES332_A04G010100v1 [Gossypium tomentosum]
Gosto.005G384700-1	TYI31796.1	80	80	16	0	394	633	13	92	2.38e-32	134	69	hypothetical protein ES332_A04G010100v1 [Gossypium tomentosum]
Gosto.005G384700-1	TYI31796.1	67.021	94	28	1	1117	1398	2	92	2.29e-29	126	69	hypothetical protein ES332_A04G010100v1 [Gossypium tomentosum]
Gosto.005G384700-1	AAS73001.2	82.955	176	28	1	676	1197	1	176	1.24e-94	301	69	dirigent-like protein [Gossypium barbadense]
Gosto.005G384700-1	AAS73001.2	87.791	172	21	0	1441	1956	1	172	5.79e-89	286	69	dirigent-like protein [Gossypium barbadense]
Gosto.005G384700-1	AAS73001.2	82.432	74	13	0	412	633	19	92	4.11e-30	128	69	dirigent-like protein [Gossypium barbadense]
Gosto.005G384700-1	AAS73001.2	64.894	94	30	1	1117	1398	2	92	9.19e-28	121	69	dirigent-like protein [Gossypium barbadense]
Gosto.005G384700-1	XP_016731186.1	83.333	174	29	0	676	1197	1	174	6.76e-94	299	69	PREDICTED: dirigent protein 4-like [Gossypium hirsutum]
Gosto.005G384700-1	XP_016731186.1	79.651	172	33	1	1441	1956	1	170	8.35e-79	259	69	PREDICTED: dirigent protein 4-like [Gossypium hirsutum]
Gosto.005G384700-1	XP_016731186.1	60.638	94	32	2	1117	1398	2	90	2.28e-23	108	69	PREDICTED: dirigent protein 4-like [Gossypium hirsutum]
Gosto.005G384700-1	XP_016731186.1	71.622	74	19	1	412	633	19	90	6.04e-23	107	69	PREDICTED: dirigent protein 4-like [Gossypium hirsutum]
Gosto.005G384700-1	MBA0637351.1	82.386	176	29	1	676	1197	1	176	8.78e-94	298	69	hypothetical protein [Gossypium davidsonii]
Gosto.005G384700-1	MBA0637351.1	87.791	172	21	0	1441	1956	1	172	1.72e-89	287	69	hypothetical protein [Gossypium davidsonii]
Gosto.005G384700-1	MBA0637351.1	82.432	74	13	0	412	633	19	92	1.26e-30	129	69	hypothetical protein [Gossypium davidsonii]
Gosto.005G384700-1	MBA0637351.1	64.894	94	30	1	1117	1398	2	92	2.42e-28	123	69	hypothetical protein [Gossypium davidsonii]
Gosto.005G384700-1	MBA0881523.1	82.386	176	29	1	676	1197	1	176	1.76e-93	298	69	hypothetical protein [Gossypium schwendimanii]
Gosto.005G384700-1	MBA0881523.1	87.791	172	21	0	1441	1956	1	172	3.59e-89	286	69	hypothetical protein [Gossypium schwendimanii]
Gosto.005G384700-1	MBA0881523.1	82.432	74	13	0	412	633	19	92	1.77e-30	129	69	hypothetical protein [Gossypium schwendimanii]
Gosto.005G384700-1	MBA0881523.1	63.83	94	31	1	1117	1398	2	92	1.38e-27	121	69	hypothetical protein [Gossypium schwendimanii]
Gosto.005G384700-1	XP_012448055.1	81.818	176	30	1	676	1197	1	176	2.07e-93	298	69	PREDICTED: dirigent protein 4-like [Gossypium raimondii]
Gosto.005G384700-1	XP_012448055.1	84.884	172	26	0	1441	1956	1	172	6.25e-87	281	69	PREDICTED: dirigent protein 4-like [Gossypium raimondii]
Gosto.005G384700-1	XP_012448055.1	76.25	80	19	0	394	633	13	92	2.67e-30	129	69	PREDICTED: dirigent protein 4-like [Gossypium raimondii]
Gosto.005G384700-1	XP_012448055.1	63.83	94	31	1	1117	1398	2	92	2.65e-26	117	69	PREDICTED: dirigent protein 4-like [Gossypium raimondii]
Gosto.005G384700-1	XP_016731191.1	82.759	174	30	0	676	1197	1	174	2.36e-93	297	69	PREDICTED: dirigent protein 4-like [Gossypium hirsutum]
Gosto.005G384700-1	XP_016731191.1	79.07	172	34	1	1441	1956	1	170	2.92e-78	258	69	PREDICTED: dirigent protein 4-like [Gossypium hirsutum]
Gosto.005G384700-1	XP_016731191.1	60.638	94	32	2	1117	1398	2	90	2.34e-23	108	69	PREDICTED: dirigent protein 4-like [Gossypium hirsutum]
Gosto.005G384700-1	XP_016731191.1	71.622	74	19	1	412	633	19	90	6.22e-23	107	69	PREDICTED: dirigent protein 4-like [Gossypium hirsutum]
Gosto.005G384700-1	XP_016718370.1	82.759	174	28	1	682	1197	5	178	3.54e-93	297	66	PREDICTED: dirigent protein 4-like [Gossypium hirsutum]
Gosto.005G384700-1	XP_016718370.1	89.677	155	16	0	1492	1956	20	174	2.11e-90	290	66	PREDICTED: dirigent protein 4-like [Gossypium hirsutum]
Gosto.005G384700-1	XP_016718370.1	85.135	74	11	0	412	633	21	94	4.58e-32	134	66	PREDICTED: dirigent protein 4-like [Gossypium hirsutum]
Gosto.005G384700-1	XP_016718370.1	64.948	97	31	1	1108	1398	1	94	5.09e-29	125	66	PREDICTED: dirigent protein 4-like [Gossypium hirsutum]
Gosto.005G384700-1	CTQ87350.1	82.184	174	31	0	676	1197	1	174	5.67e-93	296	69	Gossypium hirsutum dirigent protein 4 [Gossypium hirsutum]
Gosto.005G384700-1	CTQ87350.1	77.326	172	37	1	1441	1956	1	170	3.86e-77	255	69	Gossypium hirsutum dirigent protein 4 [Gossypium hirsutum]
Gosto.005G384700-1	CTQ87350.1	67.5	80	24	1	394	633	13	90	2.48e-23	108	69	Gossypium hirsutum dirigent protein 4 [Gossypium hirsutum]
Gosto.005G384700-1	CTQ87350.1	60.638	94	32	2	1117	1398	2	90	4.31e-23	108	69	Gossypium hirsutum dirigent protein 4 [Gossypium hirsutum]
Gosto.005G384700-1	XP_017605815.1	82.184	174	31	0	676	1197	1	174	8.16e-93	296	69	PREDICTED: dirigent protein 4-like [Gossypium arboreum]
Gosto.005G384700-1	XP_017605815.1	77.907	172	36	1	1441	1956	1	170	8.92e-77	254	69	PREDICTED: dirigent protein 4-like [Gossypium arboreum]
Gosto.005G384700-1	XP_017605815.1	60.638	94	32	2	1117	1398	2	90	2.21e-23	108	69	PREDICTED: dirigent protein 4-like [Gossypium arboreum]
Gosto.005G384700-1	XP_017605815.1	71.622	74	19	1	412	633	19	90	6.16e-23	107	69	PREDICTED: dirigent protein 4-like [Gossypium arboreum]
Gosto.005G384700-1	XP_016685934.1	81.25	176	31	1	676	1197	1	176	8.47e-93	296	69	PREDICTED: dirigent protein 4-like [Gossypium hirsutum]
Gosto.005G384700-1	XP_016685934.1	84.302	172	27	0	1441	1956	1	172	2.78e-86	279	69	PREDICTED: dirigent protein 4-like [Gossypium hirsutum]
Gosto.005G384700-1	XP_016685934.1	76.25	80	19	0	394	633	13	92	2.49e-30	129	69	PREDICTED: dirigent protein 4-like [Gossypium hirsutum]
Gosto.005G384700-1	XP_016685934.1	63.83	94	31	1	1117	1398	2	92	2.48e-26	117	69	PREDICTED: dirigent protein 4-like [Gossypium hirsutum]
Gosto.005G384700-1	XP_016684985.1	82.184	174	31	0	676	1197	1	174	1.07e-92	296	69	PREDICTED: dirigent protein 4-like [Gossypium hirsutum]
Gosto.005G384700-1	XP_016684985.1	77.907	172	36	1	1441	1956	1	170	3.68e-76	253	69	PREDICTED: dirigent protein 4-like [Gossypium hirsutum]
Gosto.005G384700-1	XP_016684985.1	67.5	80	24	1	394	633	13	90	9.43e-24	110	69	PREDICTED: dirigent protein 4-like [Gossypium hirsutum]
Gosto.005G384700-1	XP_016684985.1	59.574	94	33	2	1117	1398	2	90	2.84e-23	108	69	PREDICTED: dirigent protein 4-like [Gossypium hirsutum]
Gosto.005G384700-1	KAB2031488.1	80.682	176	32	1	676	1197	1	176	1.57e-92	295	69	hypothetical protein ES319_D05G308100v1 [Gossypium barbadense]
Gosto.005G384700-1	KAB2031488.1	83.14	172	29	0	1441	1956	1	172	6.08e-85	275	69	hypothetical protein ES319_D05G308100v1 [Gossypium barbadense]
Gosto.005G384700-1	KAB2031488.1	75	80	20	0	394	633	13	92	2.2e-29	126	69	hypothetical protein ES319_D05G308100v1 [Gossypium barbadense]
Gosto.005G384700-1	KAB2031488.1	62.766	94	32	1	1117	1398	2	92	2.33e-25	114	69	hypothetical protein ES319_D05G308100v1 [Gossypium barbadense]
Gosto.005G384700-1	XP_017646934.1	82.184	174	29	1	682	1197	5	178	1.74e-92	295	66	PREDICTED: dirigent protein 4-like [Gossypium arboreum]
Gosto.005G384700-1	XP_017646934.1	89.032	155	17	0	1492	1956	20	174	9.59e-90	288	66	PREDICTED: dirigent protein 4-like [Gossypium arboreum]
Gosto.005G384700-1	XP_017646934.1	83.784	74	12	0	412	633	21	94	1.5e-31	132	66	PREDICTED: dirigent protein 4-like [Gossypium arboreum]
Gosto.005G384700-1	XP_017646934.1	64.948	97	31	1	1108	1398	1	94	3.65e-29	125	66	PREDICTED: dirigent protein 4-like [Gossypium arboreum]
Gosto.005G384700-1	TYI31795.1	82.184	174	29	1	682	1197	5	178	3.88e-92	294	66	hypothetical protein ES332_A04G010000v1 [Gossypium tomentosum]
Gosto.005G384700-1	TYI31795.1	89.032	155	17	0	1492	1956	20	174	2.3e-89	287	66	hypothetical protein ES332_A04G010000v1 [Gossypium tomentosum]
Gosto.005G384700-1	TYI31795.1	83.784	74	12	0	412	633	21	94	4.32e-31	131	66	hypothetical protein ES332_A04G010000v1 [Gossypium tomentosum]
Gosto.005G384700-1	TYI31795.1	63.918	97	32	1	1108	1398	1	94	5.07e-28	122	66	hypothetical protein ES332_A04G010000v1 [Gossypium tomentosum]
Gosto.005G384700-1	XP_017605795.1	82.184	174	31	0	676	1197	1	174	4.76e-92	294	69	PREDICTED: dirigent protein 4-like [Gossypium arboreum]
Gosto.005G384700-1	XP_017605795.1	78.488	172	35	1	1441	1956	1	170	6.63e-77	254	69	PREDICTED: dirigent protein 4-like [Gossypium arboreum]
Gosto.005G384700-1	XP_017605795.1	59.574	94	33	2	1117	1398	2	90	4.43e-22	105	69	PREDICTED: dirigent protein 4-like [Gossypium arboreum]
Gosto.005G384700-1	XP_017605795.1	70.27	74	20	1	412	633	19	90	1.25e-21	103	69	PREDICTED: dirigent protein 4-like [Gossypium arboreum]
Gosto.005G384700-1	MBA0624416.1	81.25	176	31	1	676	1197	1	176	5.86e-92	294	69	hypothetical protein [Gossypium davidsonii]
Gosto.005G384700-1	MBA0624416.1	84.884	172	26	0	1441	1956	1	172	3.79e-87	281	69	hypothetical protein [Gossypium davidsonii]
Gosto.005G384700-1	MBA0624416.1	76.25	80	19	0	394	633	13	92	2.4e-30	129	69	hypothetical protein [Gossypium davidsonii]
Gosto.005G384700-1	MBA0624416.1	78.873	71	15	0	1186	1398	22	92	3.91e-26	117	69	hypothetical protein [Gossypium davidsonii]
Gosto.005G384700-1	MBA0775978.1	80.682	176	32	1	676	1197	1	176	1.16e-91	293	69	hypothetical protein [Gossypium trilobum]
Gosto.005G384700-1	MBA0775978.1	84.302	172	27	0	1441	1956	1	172	1.25e-86	280	69	hypothetical protein [Gossypium trilobum]
Gosto.005G384700-1	MBA0775978.1	77.5	80	18	0	394	633	13	92	2.76e-31	131	69	hypothetical protein [Gossypium trilobum]
Gosto.005G384700-1	MBA0775978.1	80.282	71	14	0	1186	1398	22	92	4.99e-27	119	69	hypothetical protein [Gossypium trilobum]
Gosto.005G384700-1	MBA0661022.1	82.184	174	31	0	676	1197	1	174	1.64e-91	293	69	hypothetical protein [Gossypium klotzschianum]
Gosto.005G384700-1	MBA0661022.1	79.651	172	33	1	1441	1956	1	170	6.49e-81	265	69	hypothetical protein [Gossypium klotzschianum]
Gosto.005G384700-1	MBA0661022.1	58.511	94	34	2	1117	1398	2	90	4.65e-23	108	69	hypothetical protein [Gossypium klotzschianum]
Gosto.005G384700-1	MBA0661022.1	68.919	74	21	1	412	633	19	90	3.55e-22	105	69	hypothetical protein [Gossypium klotzschianum]
Gosto.005G384700-1	XP_016684986.1	81.609	174	32	0	676	1197	1	174	2.1e-91	292	69	PREDICTED: dirigent protein 4-like [Gossypium hirsutum]
Gosto.005G384700-1	XP_016684986.1	80.814	172	31	1	1441	1956	1	170	5.82e-79	260	69	PREDICTED: dirigent protein 4-like [Gossypium hirsutum]
Gosto.005G384700-1	XP_016684986.1	66.25	80	25	1	394	633	13	90	6.79e-23	107	69	PREDICTED: dirigent protein 4-like [Gossypium hirsutum]
Gosto.005G384700-1	XP_016684986.1	59.574	94	33	2	1117	1398	2	90	1.07e-22	107	69	PREDICTED: dirigent protein 4-like [Gossypium hirsutum]
Gosto.005G384700-1	TYH75036.1	82.456	171	28	1	691	1197	1	171	2.53e-91	292	65	hypothetical protein ES332_D05G445600v1 [Gossypium tomentosum]
Gosto.005G384700-1	TYH75036.1	89.032	155	17	0	1492	1956	13	167	1.03e-88	285	65	hypothetical protein ES332_D05G445600v1 [Gossypium tomentosum]
Gosto.005G384700-1	TYH75036.1	83.784	74	12	0	412	633	14	87	3.23e-31	131	65	hypothetical protein ES332_D05G445600v1 [Gossypium tomentosum]
Gosto.005G384700-1	TYH75036.1	83.099	71	12	0	1186	1398	17	87	1.28e-28	124	65	hypothetical protein ES332_D05G445600v1 [Gossypium tomentosum]
Gosto.005G384700-1	XP_017605810.1	81.609	174	32	0	676	1197	1	174	3.12e-91	292	69	PREDICTED: dirigent protein 4-like [Gossypium arboreum]
Gosto.005G384700-1	XP_017605810.1	78.488	172	35	1	1441	1956	1	170	6.84e-77	254	69	PREDICTED: dirigent protein 4-like [Gossypium arboreum]
Gosto.005G384700-1	XP_017605810.1	59.574	94	33	2	1117	1398	2	90	2.65e-22	105	69	PREDICTED: dirigent protein 4-like [Gossypium arboreum]
Gosto.005G384700-1	XP_017605810.1	70.27	74	20	1	412	633	19	90	1.22e-21	103	69	PREDICTED: dirigent protein 4-like [Gossypium arboreum]
Gosto.005G384700-1	AAY44415.1	81.034	174	33	0	676	1197	1	174	5.92e-91	291	69	dirigent-like protein [Gossypium barbadense]
Gosto.005G384700-1	AAY44415.1	79.651	172	33	1	1441	1956	1	170	6.14e-79	260	69	dirigent-like protein [Gossypium barbadense]
Gosto.005G384700-1	AAY44415.1	60.638	94	32	2	1117	1398	2	90	1.75e-23	109	69	dirigent-like protein [Gossypium barbadense]
Gosto.005G384700-1	AAY44415.1	71.622	74	19	1	412	633	19	90	5.18e-23	108	69	dirigent-like protein [Gossypium barbadense]
Gosto.005G384700-1	MBA0776911.1	81.714	175	31	1	676	1197	1	175	1.88e-90	290	69	hypothetical protein [Gossypium trilobum]
Gosto.005G384700-1	MBA0776911.1	76.744	172	39	1	1441	1956	1	171	8.07e-76	251	69	hypothetical protein [Gossypium trilobum]
Gosto.005G384700-1	MBA0776911.1	56.383	94	37	2	1117	1398	2	91	9.67e-22	104	69	hypothetical protein [Gossypium trilobum]
Gosto.005G384700-1	MBA0776911.1	66.216	74	24	1	412	633	19	91	4.08e-21	102	69	hypothetical protein [Gossypium trilobum]
Gosto.005G384700-1	MBA0776915.1	94.595	148	8	0	691	1134	1	148	2.27e-90	290	62	hypothetical protein [Gossypium trilobum]
Gosto.005G384700-1	MBA0776915.1	84.783	138	19	1	1492	1905	13	148	7.62e-71	238	62	hypothetical protein [Gossypium trilobum]
Gosto.005G384700-1	MBA0776915.1	72.5	80	20	1	394	633	8	85	9.85e-26	115	62	hypothetical protein [Gossypium trilobum]
Gosto.005G384700-1	MBA0776915.1	78.873	71	13	1	1186	1398	17	85	1.69e-24	112	62	hypothetical protein [Gossypium trilobum]
Gosto.005G384700-1	XP_012443942.1	81.034	174	33	0	676	1197	1	174	8.91e-90	288	69	PREDICTED: dirigent protein 4-like isoform X2 [Gossypium raimondii]
Gosto.005G384700-1	XP_012443942.1	80.814	172	31	1	1441	1956	1	170	2.41e-78	258	69	PREDICTED: dirigent protein 4-like isoform X2 [Gossypium raimondii]
Gosto.005G384700-1	XP_012443942.1	65.823	79	25	1	394	630	13	89	6.52e-22	104	69	PREDICTED: dirigent protein 4-like isoform X2 [Gossypium raimondii]
Gosto.005G384700-1	XP_012443942.1	58.065	93	34	2	1117	1395	2	89	2.36e-21	103	69	PREDICTED: dirigent protein 4-like isoform X2 [Gossypium raimondii]
Gosto.005G384700-1	XP_017605956.1	78.977	176	35	1	676	1197	1	176	9.75e-90	288	69	PREDICTED: dirigent protein 4-like [Gossypium arboreum]
Gosto.005G384700-1	XP_017605956.1	82.558	172	30	0	1441	1956	1	172	7.33e-84	273	69	PREDICTED: dirigent protein 4-like [Gossypium arboreum]
Gosto.005G384700-1	XP_017605956.1	75	80	20	0	394	633	13	92	9.6e-30	127	69	PREDICTED: dirigent protein 4-like [Gossypium arboreum]
Gosto.005G384700-1	XP_017605956.1	63.83	94	31	1	1117	1398	2	92	1.71e-26	118	69	PREDICTED: dirigent protein 4-like [Gossypium arboreum]
Gosto.005G384700-1	XP_016731192.1	80.46	174	34	0	676	1197	1	174	1.34e-89	288	69	PREDICTED: dirigent protein 4-like [Gossypium hirsutum]
Gosto.005G384700-1	XP_016731192.1	77.907	172	36	1	1441	1956	1	170	8.76e-76	251	69	PREDICTED: dirigent protein 4-like [Gossypium hirsutum]
Gosto.005G384700-1	XP_016731192.1	59.574	94	33	2	1117	1398	2	90	3.83e-22	105	69	PREDICTED: dirigent protein 4-like [Gossypium hirsutum]
Gosto.005G384700-1	XP_016731192.1	70.27	74	20	1	412	633	19	90	1.21e-21	103	69	PREDICTED: dirigent protein 4-like [Gossypium hirsutum]
Gosto.005G384700-1	TYI29521.1	78.409	176	36	1	676	1197	1	176	1.37e-89	288	69	hypothetical protein ES332_A05G321900v1 [Gossypium tomentosum]
Gosto.005G384700-1	TYI29521.1	81.977	172	31	0	1441	1956	1	172	1.04e-83	272	69	hypothetical protein ES332_A05G321900v1 [Gossypium tomentosum]
Gosto.005G384700-1	TYI29521.1	75	80	20	0	394	633	13	92	9.15e-30	127	69	hypothetical protein ES332_A05G321900v1 [Gossypium tomentosum]
Gosto.005G384700-1	TYI29521.1	63.83	94	31	1	1117	1398	2	92	1.66e-26	118	69	hypothetical protein ES332_A05G321900v1 [Gossypium tomentosum]
Gosto.005G384700-1	KAB2084003.1	78.409	176	36	1	676	1197	1	176	2.02e-89	287	69	hypothetical protein ES319_A05G305500v1 [Gossypium barbadense]
Gosto.005G384700-1	KAB2084003.1	81.977	172	31	0	1441	1956	1	172	1.51e-83	272	69	hypothetical protein ES319_A05G305500v1 [Gossypium barbadense]
Gosto.005G384700-1	KAB2084003.1	75	80	20	0	394	633	13	92	9.6e-30	127	69	hypothetical protein ES319_A05G305500v1 [Gossypium barbadense]
Gosto.005G384700-1	KAB2084003.1	63.83	94	31	1	1117	1398	2	92	1.71e-26	118	69	hypothetical protein ES319_A05G305500v1 [Gossypium barbadense]
Gosto.005G384700-1	XP_012443936.1	79.885	174	35	0	676	1197	1	174	3.76e-89	286	69	PREDICTED: dirigent protein 4-like [Gossypium raimondii]
Gosto.005G384700-1	XP_012443936.1	77.586	174	37	1	1441	1962	1	172	2e-77	256	69	PREDICTED: dirigent protein 4-like [Gossypium raimondii]
Gosto.005G384700-1	XP_012443936.1	58.511	94	34	2	1117	1398	2	90	2.25e-23	108	69	PREDICTED: dirigent protein 4-like [Gossypium raimondii]
Gosto.005G384700-1	XP_012443936.1	67.568	74	22	1	412	633	19	90	3.97e-21	102	69	PREDICTED: dirigent protein 4-like [Gossypium raimondii]
Gosto.005G384700-1	MBA0722125.1	83.523	176	27	1	676	1197	1	176	4.12e-89	286	69	hypothetical protein [Gossypium laxum]
Gosto.005G384700-1	MBA0722125.1	83.14	172	29	0	1441	1956	1	172	1.41e-76	254	69	hypothetical protein [Gossypium laxum]
Gosto.005G384700-1	MBA0722125.1	75.676	74	18	0	412	633	19	92	5.84e-20	99.4	69	hypothetical protein [Gossypium laxum]
Gosto.005G384700-1	MBA0722125.1	74.648	71	18	0	1186	1398	22	92	2.46e-19	97.4	69	hypothetical protein [Gossypium laxum]
Gosto.005G384700-1	KAB2086159.1	79.885	174	35	0	676	1197	1	174	1.59e-88	285	69	hypothetical protein ES319_A04G009700v1 [Gossypium barbadense]
Gosto.005G384700-1	KAB2086159.1	77.907	172	36	1	1441	1956	1	170	9.43e-76	251	69	hypothetical protein ES319_A04G009700v1 [Gossypium barbadense]
Gosto.005G384700-1	KAB2086159.1	59.574	94	33	2	1117	1398	2	90	5.42e-22	105	69	hypothetical protein ES319_A04G009700v1 [Gossypium barbadense]
Gosto.005G384700-1	KAB2086159.1	70.27	74	20	1	412	633	19	90	1.83e-21	103	69	hypothetical protein ES319_A04G009700v1 [Gossypium barbadense]
Gosto.005G384700-1	KAB2033033.1	78.736	174	37	0	676	1197	1	174	2.74e-88	284	69	hypothetical protein ES319_D05G420000v1 [Gossypium barbadense]
Gosto.005G384700-1	KAB2033033.1	77.326	172	37	1	1441	1956	1	170	1.29e-76	254	69	hypothetical protein ES319_D05G420000v1 [Gossypium barbadense]
Gosto.005G384700-1	KAB2033033.1	58.511	94	34	2	1117	1398	2	90	2.32e-23	108	69	hypothetical protein ES319_D05G420000v1 [Gossypium barbadense]
Gosto.005G384700-1	KAB2033033.1	67.568	74	22	1	412	633	19	90	4.05e-21	102	69	hypothetical protein ES319_D05G420000v1 [Gossypium barbadense]
Gosto.005G384700-1	TYH75028.1	74.869	191	30	2	631	1197	8	182	6.07e-87	281	73	hypothetical protein ES332_D05G444800v1 [Gossypium tomentosum]
Gosto.005G384700-1	TYH75028.1	71.958	189	33	3	1396	1956	8	178	4.32e-72	242	73	hypothetical protein ES332_D05G444800v1 [Gossypium tomentosum]
Gosto.005G384700-1	TYH75028.1	67.5	80	24	1	394	633	37	114	2.54e-23	109	73	hypothetical protein ES332_D05G444800v1 [Gossypium tomentosum]
Gosto.005G384700-1	TYH75028.1	59.574	94	33	2	1117	1398	26	114	7.51e-23	107	73	hypothetical protein ES332_D05G444800v1 [Gossypium tomentosum]
Gosto.005G384700-1	MBA0722122.1	78.736	174	37	0	676	1197	1	174	6.22e-87	281	69	hypothetical protein [Gossypium laxum]
Gosto.005G384700-1	MBA0722122.1	77.326	172	37	1	1441	1956	1	170	8.41e-78	257	69	hypothetical protein [Gossypium laxum]
Gosto.005G384700-1	MBA0722122.1	56.383	94	36	2	1117	1398	2	90	3.94e-22	105	69	hypothetical protein [Gossypium laxum]
Gosto.005G384700-1	MBA0722122.1	67.568	74	22	1	412	633	19	90	5.53e-22	105	69	hypothetical protein [Gossypium laxum]
Gosto.005G384700-1	MBA0864859.1	77.586	174	39	0	676	1197	1	174	2.59e-86	279	69	hypothetical protein [Gossypium schwendimanii]
Gosto.005G384700-1	MBA0864859.1	76.163	172	39	1	1441	1956	1	170	9.13e-73	244	69	hypothetical protein [Gossypium schwendimanii]
Gosto.005G384700-1	MBA0864859.1	62.5	80	28	1	394	633	13	90	1.07e-20	101	69	hypothetical protein [Gossypium schwendimanii]
Gosto.005G384700-1	MBA0864859.1	55.319	94	37	2	1117	1398	2	90	2.53e-20	100	69	hypothetical protein [Gossypium schwendimanii]
Gosto.005G384700-1	MBA0661036.1	93.007	143	10	0	676	1104	1	143	1.93e-85	275	65	hypothetical protein [Gossypium klotzschianum]
Gosto.005G384700-1	MBA0661036.1	85.517	145	19	1	1441	1875	1	143	5.49e-68	230	65	hypothetical protein [Gossypium klotzschianum]
Gosto.005G384700-1	MBA0661036.1	73.75	80	19	1	394	633	13	90	4.91e-28	121	65	hypothetical protein [Gossypium klotzschianum]
Gosto.005G384700-1	MBA0661036.1	64.894	94	28	2	1117	1398	2	90	1.76e-27	119	65	hypothetical protein [Gossypium klotzschianum]
Gosto.005G384700-1	XP_016684982.1	77.011	174	40	0	676	1197	1	174	4.35e-85	276	69	PREDICTED: dirigent protein 4-like [Gossypium hirsutum]
Gosto.005G384700-1	XP_016684982.1	75.287	174	41	1	1441	1962	1	172	4.23e-74	247	69	PREDICTED: dirigent protein 4-like [Gossypium hirsutum]
Gosto.005G384700-1	XP_016684982.1	56.383	94	36	2	1117	1398	2	90	3.15e-21	102	69	PREDICTED: dirigent protein 4-like [Gossypium hirsutum]
Gosto.005G384700-1	XP_016684982.1	64.865	74	24	1	412	633	19	90	5.45e-19	96.7	69	PREDICTED: dirigent protein 4-like [Gossypium hirsutum]
Gosto.005G384700-1	TYJ38692.1	77.011	174	40	0	676	1197	1	174	8.51e-85	275	69	hypothetical protein E1A91_A04G009800v1 [Gossypium mustelinum]
Gosto.005G384700-1	TYJ38692.1	76.163	172	39	1	1441	1956	1	170	1.81e-72	243	69	hypothetical protein E1A91_A04G009800v1 [Gossypium mustelinum]
Gosto.005G384700-1	TYJ38692.1	57.447	94	35	2	1117	1398	2	90	3.75e-21	102	69	hypothetical protein E1A91_A04G009800v1 [Gossypium mustelinum]
Gosto.005G384700-1	TYJ38692.1	67.568	74	22	1	412	633	19	90	1.99e-20	100	69	hypothetical protein E1A91_A04G009800v1 [Gossypium mustelinum]
Gosto.005G384700-1	MBA0661027.1	90.21	143	14	0	676	1104	1	143	3.99e-83	270	65	hypothetical protein [Gossypium klotzschianum]
Gosto.005G384700-1	MBA0661027.1	80.69	145	26	1	1441	1875	1	143	5.22e-62	214	65	hypothetical protein [Gossypium klotzschianum]
Gosto.005G384700-1	MBA0661027.1	72.5	80	20	1	394	633	13	90	8.7e-27	117	65	hypothetical protein [Gossypium klotzschianum]
Gosto.005G384700-1	MBA0661027.1	63.83	94	29	2	1117	1398	2	90	2.51e-26	116	65	hypothetical protein [Gossypium klotzschianum]
Gosto.005G384700-1	XP_017647637.1	76.136	176	40	1	676	1197	1	176	8.46e-83	270	69	PREDICTED: dirigent protein 4-like [Gossypium arboreum]
Gosto.005G384700-1	XP_017647637.1	83.14	172	29	0	1441	1956	1	172	1.56e-75	251	69	PREDICTED: dirigent protein 4-like [Gossypium arboreum]
Gosto.005G384700-1	XP_017647637.1	75	80	20	0	394	633	13	92	1.46e-21	103	69	PREDICTED: dirigent protein 4-like [Gossypium arboreum]
Gosto.005G384700-1	XP_017647637.1	63.83	94	31	1	1117	1398	2	92	3.84e-21	102	69	PREDICTED: dirigent protein 4-like [Gossypium arboreum]
Gosto.005G384700-1	PPD98256.1	76.437	174	29	1	676	1197	1	162	3.3e-82	268	69	hypothetical protein GOBAR_DD04756 [Gossypium barbadense]
Gosto.005G384700-1	PPD98256.1	78.488	172	23	1	1441	1956	1	158	3.88e-71	239	69	hypothetical protein GOBAR_DD04756 [Gossypium barbadense]
Gosto.005G384700-1	PPD98256.1	56.757	74	18	1	412	633	19	78	7.71e-13	78.6	69	hypothetical protein GOBAR_DD04756 [Gossypium barbadense]
Gosto.005G384700-1	PPD98256.1	46.809	94	33	2	1117	1398	2	78	3.74e-12	76.6	69	hypothetical protein GOBAR_DD04756 [Gossypium barbadense]
Gosto.005G384700-1	MBA0747088.1	75.568	176	41	1	676	1197	1	176	4.26e-81	265	69	hypothetical protein [Gossypium gossypioides]
Gosto.005G384700-1	MBA0747088.1	83.14	172	29	0	1441	1956	1	172	4.58e-75	249	69	hypothetical protein [Gossypium gossypioides]
Gosto.005G384700-1	MBA0747088.1	73.75	80	21	0	394	633	13	92	1.14e-20	101	69	hypothetical protein [Gossypium gossypioides]
Gosto.005G384700-1	MBA0747088.1	62.766	94	32	1	1117	1398	2	92	3.09e-20	100	69	hypothetical protein [Gossypium gossypioides]
Gosto.005G384700-1	MBA0838372.1	75.568	176	41	1	676	1197	1	176	4.26e-81	265	69	hypothetical protein [Gossypium armourianum]
Gosto.005G384700-1	MBA0838372.1	82.558	172	30	0	1441	1956	1	172	4.58e-75	249	69	hypothetical protein [Gossypium armourianum]
Gosto.005G384700-1	MBA0838372.1	72.5	80	22	0	394	633	13	92	1.14e-20	101	69	hypothetical protein [Gossypium armourianum]
Gosto.005G384700-1	MBA0838372.1	61.702	94	33	1	1117	1398	2	92	3.09e-20	100	69	hypothetical protein [Gossypium armourianum]
Gosto.005G384700-1	KAB2086152.1	75	176	42	1	676	1197	1	176	5.1e-81	265	69	hypothetical protein ES319_A04G009000v1 [Gossypium barbadense]
Gosto.005G384700-1	KAB2086152.1	81.977	172	31	0	1441	1956	1	172	8.62e-74	246	69	hypothetical protein ES319_A04G009000v1 [Gossypium barbadense]
Gosto.005G384700-1	KAB2086152.1	75	80	20	0	394	633	13	92	1.67e-21	103	69	hypothetical protein ES319_A04G009000v1 [Gossypium barbadense]
Gosto.005G384700-1	KAB2086152.1	63.83	94	31	1	1117	1398	2	92	3.99e-21	102	69	hypothetical protein ES319_A04G009000v1 [Gossypium barbadense]
Gosto.005G384700-1	MBA0881525.1	84.106	151	22	1	676	1122	1	151	8.86e-81	264	66	hypothetical protein [Gossypium schwendimanii]
Gosto.005G384700-1	MBA0881525.1	86.093	151	21	0	1441	1893	1	151	3.6e-74	246	66	hypothetical protein [Gossypium schwendimanii]
Gosto.005G384700-1	MBA0881525.1	82.432	74	13	0	412	633	19	92	4.67e-31	130	66	hypothetical protein [Gossypium schwendimanii]
Gosto.005G384700-1	MBA0881525.1	64.894	94	30	1	1117	1398	2	92	1.04e-28	123	66	hypothetical protein [Gossypium schwendimanii]
Gosto.005G384700-1	XP_016684501.1	75.568	176	41	1	676	1197	1	176	1.11e-80	265	69	PREDICTED: dirigent protein 4-like [Gossypium hirsutum]
Gosto.005G384700-1	XP_016684501.1	81.977	172	31	0	1441	1956	1	172	1.08e-74	249	69	PREDICTED: dirigent protein 4-like [Gossypium hirsutum]
Gosto.005G384700-1	XP_016684501.1	71.25	80	23	0	394	633	13	92	2.72e-20	100	69	PREDICTED: dirigent protein 4-like [Gossypium hirsutum]
Gosto.005G384700-1	XP_016684501.1	60.638	94	34	1	1117	1398	2	92	7.08e-20	99	69	PREDICTED: dirigent protein 4-like [Gossypium hirsutum]
Gosto.005G384700-1	TYG72087.1	75.568	176	41	1	676	1197	1	176	1.28e-80	264	69	hypothetical protein ES288_D05G452000v1 [Gossypium darwinii]
Gosto.005G384700-1	TYG72087.1	81.395	172	32	0	1441	1956	1	172	4.12e-74	247	69	hypothetical protein ES288_D05G452000v1 [Gossypium darwinii]
Gosto.005G384700-1	TYG72087.1	71.25	80	23	0	394	633	13	92	2.91e-20	100	69	hypothetical protein ES288_D05G452000v1 [Gossypium darwinii]
Gosto.005G384700-1	TYG72087.1	60.638	94	34	1	1117	1398	2	92	7.36e-20	99	69	hypothetical protein ES288_D05G452000v1 [Gossypium darwinii]
Gosto.005G384700-1	XP_012443949.1	75	176	42	1	676	1197	1	176	2.51e-80	263	69	PREDICTED: dirigent protein 4-like [Gossypium raimondii]
Gosto.005G384700-1	XP_012443949.1	81.395	172	32	0	1441	1956	1	172	9.59e-75	249	69	PREDICTED: dirigent protein 4-like [Gossypium raimondii]
Gosto.005G384700-1	XP_012443949.1	71.25	80	23	0	394	633	13	92	2.38e-20	100	69	PREDICTED: dirigent protein 4-like [Gossypium raimondii]
Gosto.005G384700-1	XP_012443949.1	60.638	94	34	1	1117	1398	2	92	5.2e-20	99.4	69	PREDICTED: dirigent protein 4-like [Gossypium raimondii]
Gosto.005G384700-1	MBA0625462.1	75.568	176	41	1	676	1197	1	176	8.4e-80	262	69	hypothetical protein [Gossypium davidsonii]
Gosto.005G384700-1	MBA0625462.1	81.977	172	31	0	1441	1956	1	172	8.35e-74	246	69	hypothetical protein [Gossypium davidsonii]
Gosto.005G384700-1	MBA0625462.1	72.5	80	22	0	394	633	13	92	7.26e-21	102	69	hypothetical protein [Gossypium davidsonii]
Gosto.005G384700-1	MBA0625462.1	61.702	94	33	1	1117	1398	2	92	2.25e-20	100	69	hypothetical protein [Gossypium davidsonii]
Gosto.005G384700-1	TYH21042.1	74.432	176	43	1	676	1197	1	176	1.12e-79	262	69	hypothetical protein ES288_A04G010900v1 [Gossypium darwinii]
Gosto.005G384700-1	TYH21042.1	81.395	172	32	0	1441	1956	1	172	1.82e-72	243	69	hypothetical protein ES288_A04G010900v1 [Gossypium darwinii]
Gosto.005G384700-1	TYH21042.1	73.75	80	21	0	394	633	13	92	2.91e-20	100	69	hypothetical protein ES288_A04G010900v1 [Gossypium darwinii]
Gosto.005G384700-1	TYH21042.1	62.766	94	32	1	1117	1398	2	92	8.26e-20	99	69	hypothetical protein ES288_A04G010900v1 [Gossypium darwinii]
Gosto.005G384700-1	SCD14085.1	83.784	148	24	0	742	1185	1	148	2.31e-78	258	62	Dirigent Protein 3, partial [eukaryotic synthetic construct]
Gosto.005G384700-1	SCD14085.1	78.667	150	30	1	1507	1956	1	148	9.52e-73	243	62	Dirigent Protein 3, partial [eukaryotic synthetic construct]
Gosto.005G384700-1	SCD14085.1	72.857	70	17	1	1189	1398	1	68	1.6e-22	105	62	Dirigent Protein 3, partial [eukaryotic synthetic construct]
Gosto.005G384700-1	SCD14085.1	71.429	70	18	1	424	633	1	68	5.62e-22	104	62	Dirigent Protein 3, partial [eukaryotic synthetic construct]
Gosto.005G384700-1	SCD14086.1	83.784	148	24	0	742	1185	1	148	9.53e-78	256	62	Dirigent Protein 2, partial [Gossypium barbadense] [eukaryotic synthetic construct]
Gosto.005G384700-1	SCD14086.1	82	150	25	1	1507	1956	1	148	1.76e-75	250	62	Dirigent Protein 2, partial [Gossypium barbadense] [eukaryotic synthetic construct]
Gosto.005G384700-1	SCD14086.1	74.286	70	16	1	1189	1398	1	68	2.4e-22	105	62	Dirigent Protein 2, partial [Gossypium barbadense] [eukaryotic synthetic construct]
Gosto.005G384700-1	SCD14086.1	71.429	70	18	1	424	633	1	68	1.65e-21	103	62	Dirigent Protein 2, partial [Gossypium barbadense] [eukaryotic synthetic construct]
Gosto.005G384700-1	TYH73383.1	80.537	149	27	1	676	1116	1	149	2.99e-75	250	63	hypothetical protein ES332_D05G325400v1 [Gossypium tomentosum]
Gosto.005G384700-1	TYH73383.1	82.55	149	26	0	1441	1887	1	149	8.53e-70	235	63	hypothetical protein ES332_D05G325400v1 [Gossypium tomentosum]
Gosto.005G384700-1	TYH73383.1	76.25	80	19	0	394	633	13	92	6.48e-31	130	63	hypothetical protein ES332_D05G325400v1 [Gossypium tomentosum]
Gosto.005G384700-1	TYH73383.1	78.873	71	15	0	1186	1398	22	92	1.37e-26	117	63	hypothetical protein ES332_D05G325400v1 [Gossypium tomentosum]
Gosto.005G384700-1	MBA0775980.1	80.537	149	27	1	676	1116	1	149	9.78e-75	248	66	hypothetical protein [Gossypium trilobum]
Gosto.005G384700-1	MBA0775980.1	82.55	149	26	0	1441	1887	1	149	3.49e-69	234	66	hypothetical protein [Gossypium trilobum]
Gosto.005G384700-1	MBA0775980.1	76.25	80	19	0	394	633	13	92	6.54e-31	130	66	hypothetical protein [Gossypium trilobum]
Gosto.005G384700-1	MBA0775980.1	63.83	94	31	1	1117	1398	2	92	1.42e-26	117	66	hypothetical protein [Gossypium trilobum]
Gosto.005G384700-1	MBA0575201.1	82.581	155	27	0	1492	1956	9	163	5.21e-74	246	66	hypothetical protein [Gossypium lobatum]
Gosto.005G384700-1	MBA0575201.1	75.449	167	39	1	703	1197	1	167	6.86e-74	246	66	hypothetical protein [Gossypium lobatum]
Gosto.005G384700-1	MBA0575201.1	71.25	80	23	0	394	633	4	83	1.25e-20	100	66	hypothetical protein [Gossypium lobatum]
Gosto.005G384700-1	MBA0575201.1	74.648	71	18	0	1186	1398	13	83	7.1e-20	99	66	hypothetical protein [Gossypium lobatum]
Gosto.005G384700-1	XP_017620676.1	79.195	149	31	0	676	1122	1	149	8.35e-74	245	66	PREDICTED: dirigent protein 4-like, partial [Gossypium arboreum]
Gosto.005G384700-1	XP_017620676.1	76.159	151	34	1	1441	1893	1	149	6.36e-62	214	66	PREDICTED: dirigent protein 4-like, partial [Gossypium arboreum]
Gosto.005G384700-1	XP_017620676.1	57.447	94	35	2	1117	1398	2	90	9.57e-22	103	66	PREDICTED: dirigent protein 4-like, partial [Gossypium arboreum]
Gosto.005G384700-1	XP_017620676.1	67.568	74	22	1	412	633	19	90	6.84e-21	101	66	PREDICTED: dirigent protein 4-like, partial [Gossypium arboreum]
Gosto.005G384700-1	XP_016684123.1	78.523	149	30	1	676	1116	1	149	1.3e-72	243	63	PREDICTED: dirigent protein 4-like [Gossypium hirsutum]
Gosto.005G384700-1	XP_016684123.1	80.537	149	29	0	1441	1887	1	149	4.61e-67	228	63	PREDICTED: dirigent protein 4-like [Gossypium hirsutum]
Gosto.005G384700-1	XP_016684123.1	72.5	80	22	0	394	633	13	92	1.71e-28	123	63	PREDICTED: dirigent protein 4-like [Gossypium hirsutum]
Gosto.005G384700-1	XP_016684123.1	75.714	70	17	0	1189	1398	23	92	3.73e-24	110	63	PREDICTED: dirigent protein 4-like [Gossypium hirsutum]
Gosto.005G384700-1	MBA0746380.1	70.787	178	44	4	676	1185	1	178	1.57e-72	243	69	hypothetical protein [Gossypium gossypioides]
Gosto.005G384700-1	MBA0746380.1	71.91	178	44	3	1441	1956	1	178	2.77e-64	221	69	hypothetical protein [Gossypium gossypioides]
Gosto.005G384700-1	MBA0746380.1	60	85	29	2	394	633	13	97	5.91e-20	99.4	69	hypothetical protein [Gossypium gossypioides]
Gosto.005G384700-1	MBA0746380.1	64.384	73	23	1	1189	1398	25	97	2.87e-18	94.7	69	hypothetical protein [Gossypium gossypioides]
Gosto.005G384700-1	MBA0692425.1	69.663	178	46	4	676	1185	1	178	9.43e-72	241	68	hypothetical protein [Gossypium aridum]
Gosto.005G384700-1	MBA0692425.1	69.663	178	48	3	1441	1956	1	178	2.42e-62	216	68	hypothetical protein [Gossypium aridum]
Gosto.005G384700-1	MBA0692425.1	62.667	75	25	1	418	633	23	97	1.39e-19	98.6	68	hypothetical protein [Gossypium aridum]
Gosto.005G384700-1	MBA0692425.1	61.644	73	25	1	1189	1398	25	97	3.87e-17	91.3	68	hypothetical protein [Gossypium aridum]
Gosto.005G384700-1	MBA0746381.1	82.143	140	23	1	676	1089	1	140	1.59e-71	239	64	hypothetical protein [Gossypium gossypioides]
Gosto.005G384700-1	MBA0746381.1	84.286	140	22	0	1441	1860	1	140	6.33e-65	222	64	hypothetical protein [Gossypium gossypioides]
Gosto.005G384700-1	MBA0746381.1	77.5	80	18	0	394	633	13	92	1.89e-31	130	64	hypothetical protein [Gossypium gossypioides]
Gosto.005G384700-1	MBA0746381.1	64.894	94	30	1	1117	1398	2	92	8.08e-28	120	64	hypothetical protein [Gossypium gossypioides]
Gosto.005G384700-1	MBA0775977.1	70.225	178	45	4	676	1185	1	178	1.7e-71	241	71	hypothetical protein [Gossypium trilobum]
Gosto.005G384700-1	MBA0775977.1	71.348	178	45	3	1441	1956	1	178	2.7e-63	219	71	hypothetical protein [Gossypium trilobum]
Gosto.005G384700-1	MBA0775977.1	60	85	29	2	394	633	13	97	9.84e-21	98.6	71	hypothetical protein [Gossypium trilobum]
Gosto.005G384700-1	MBA0775977.1	84.211	19	3	0	356	412	1	19	9.84e-21	33.9	71	hypothetical protein [Gossypium trilobum]
Gosto.005G384700-1	MBA0775977.1	64.384	73	23	1	1189	1398	25	97	9.13e-18	93.2	71	hypothetical protein [Gossypium trilobum]
Gosto.005G384700-1	XP_012447945.1	70.225	178	45	4	676	1185	1	178	4.21e-71	239	68	PREDICTED: dirigent protein 4-like [Gossypium raimondii]
Gosto.005G384700-1	XP_012447945.1	71.348	178	45	3	1441	1956	1	178	7.06e-63	218	68	PREDICTED: dirigent protein 4-like [Gossypium raimondii]
Gosto.005G384700-1	XP_012447945.1	64	75	24	1	418	633	23	97	4.87e-20	99.8	68	PREDICTED: dirigent protein 4-like [Gossypium raimondii]
Gosto.005G384700-1	XP_012447945.1	64.384	73	23	1	1189	1398	25	97	8.13e-18	93.2	68	PREDICTED: dirigent protein 4-like [Gossypium raimondii]
Gosto.005G384700-1	MBA0721361.1	69.663	178	46	4	676	1185	1	178	4.87e-71	239	68	hypothetical protein [Gossypium laxum]
Gosto.005G384700-1	MBA0721361.1	70.225	178	47	3	1441	1956	1	178	2.98e-62	216	68	hypothetical protein [Gossypium laxum]
Gosto.005G384700-1	MBA0721361.1	61.333	75	26	1	418	633	23	97	5.69e-19	96.7	68	hypothetical protein [Gossypium laxum]
Gosto.005G384700-1	MBA0721361.1	61.644	73	25	1	1189	1398	25	97	9.75e-17	90.1	68	hypothetical protein [Gossypium laxum]
Gosto.005G384700-1	XP_016685935.1	69.663	178	46	4	676	1185	1	178	7.83e-71	239	68	PREDICTED: dirigent protein 4-like [Gossypium hirsutum]
Gosto.005G384700-1	XP_016685935.1	70.787	178	46	3	1441	1956	1	178	1.46e-62	217	68	PREDICTED: dirigent protein 4-like [Gossypium hirsutum]
Gosto.005G384700-1	XP_016685935.1	64	75	24	1	418	633	23	97	4.43e-20	99.8	68	PREDICTED: dirigent protein 4-like [Gossypium hirsutum]
Gosto.005G384700-1	XP_016685935.1	64.384	73	23	1	1189	1398	25	97	7.53e-18	93.6	68	PREDICTED: dirigent protein 4-like [Gossypium hirsutum]
Gosto.005G384700-1	MBA0808870.1	69.663	178	46	4	676	1185	1	178	8.61e-71	239	68	hypothetical protein [Gossypium harknessii]
Gosto.005G384700-1	MBA0808870.1	70.787	178	46	3	1441	1956	1	178	3.03e-63	219	68	hypothetical protein [Gossypium harknessii]
Gosto.005G384700-1	MBA0808870.1	64	75	24	1	418	633	23	97	5.07e-20	99.8	68	hypothetical protein [Gossypium harknessii]
Gosto.005G384700-1	MBA0808870.1	64.384	73	23	1	1189	1398	25	97	8.45e-18	93.2	68	hypothetical protein [Gossypium harknessii]
Gosto.005G384700-1	XP_017605304.1	70.225	178	45	4	676	1185	1	178	1.24e-70	238	69	PREDICTED: dirigent protein 4-like [Gossypium arboreum]
Gosto.005G384700-1	XP_017605304.1	72.472	178	43	3	1441	1956	1	178	5.14e-65	223	69	PREDICTED: dirigent protein 4-like [Gossypium arboreum]
Gosto.005G384700-1	XP_017605304.1	63.529	85	26	2	394	633	13	97	9.79e-22	104	69	PREDICTED: dirigent protein 4-like [Gossypium arboreum]
Gosto.005G384700-1	XP_017605304.1	67.123	73	21	1	1189	1398	25	97	2.58e-19	97.8	69	PREDICTED: dirigent protein 4-like [Gossypium arboreum]
Gosto.005G384700-1	MBA0624411.1	69.663	178	46	4	676	1185	1	178	1.28e-70	238	71	hypothetical protein [Gossypium davidsonii]
Gosto.005G384700-1	MBA0624411.1	70.787	178	46	3	1441	1956	1	178	2.22e-62	216	71	hypothetical protein [Gossypium davidsonii]
Gosto.005G384700-1	MBA0624411.1	62.667	75	25	1	418	633	23	97	2.92e-20	97.1	71	hypothetical protein [Gossypium davidsonii]
Gosto.005G384700-1	MBA0624411.1	84.211	19	3	0	356	412	1	19	2.92e-20	33.9	71	hypothetical protein [Gossypium davidsonii]
Gosto.005G384700-1	MBA0624411.1	63.014	73	24	1	1189	1398	25	97	9.2e-17	90.5	71	hypothetical protein [Gossypium davidsonii]
Gosto.005G384700-1	MBA0865216.1	69.101	178	47	4	676	1185	1	178	1.57e-70	238	68	hypothetical protein [Gossypium schwendimanii]
Gosto.005G384700-1	MBA0865216.1	70.225	178	47	3	1441	1956	1	178	3.41e-62	216	68	hypothetical protein [Gossypium schwendimanii]
Gosto.005G384700-1	MBA0865216.1	62.667	75	25	1	418	633	23	97	1.35e-19	98.6	68	hypothetical protein [Gossypium schwendimanii]
Gosto.005G384700-1	MBA0865216.1	63.014	73	24	1	1189	1398	25	97	2.34e-17	92	68	hypothetical protein [Gossypium schwendimanii]
Gosto.005G384700-1	TYH73381.1	69.101	178	47	4	676	1185	1	178	8.18e-70	236	68	hypothetical protein ES332_D05G325200v1 [Gossypium tomentosum]
Gosto.005G384700-1	TYH73381.1	70.225	178	47	3	1441	1956	1	178	1.56e-61	214	68	hypothetical protein ES332_D05G325200v1 [Gossypium tomentosum]
Gosto.005G384700-1	TYH73381.1	62.667	75	25	1	418	633	23	97	7.9e-19	96.3	68	hypothetical protein ES332_D05G325200v1 [Gossypium tomentosum]
Gosto.005G384700-1	TYH73381.1	63.014	73	24	1	1189	1398	25	97	5.11e-17	91.3	68	hypothetical protein ES332_D05G325200v1 [Gossypium tomentosum]
Gosto.005G384700-1	XP_016686157.1	69.663	178	46	4	676	1185	1	178	1.37e-69	236	68	PREDICTED: dirigent protein 4-like [Gossypium hirsutum]
Gosto.005G384700-1	XP_016686157.1	71.91	178	44	3	1441	1956	1	178	8.58e-65	223	68	PREDICTED: dirigent protein 4-like [Gossypium hirsutum]
Gosto.005G384700-1	XP_016686157.1	66.667	75	22	1	418	633	23	97	1.6e-21	103	68	PREDICTED: dirigent protein 4-like [Gossypium hirsutum]
Gosto.005G384700-1	XP_016686157.1	67.123	73	21	1	1189	1398	25	97	2.74e-19	97.4	68	PREDICTED: dirigent protein 4-like [Gossypium hirsutum]
Gosto.005G384700-1	MBA0566618.1	69.101	178	47	4	676	1185	1	178	2.09e-69	235	68	hypothetical protein [Gossypium lobatum]
Gosto.005G384700-1	MBA0566618.1	69.663	178	48	3	1441	1956	1	178	9.67e-61	212	68	hypothetical protein [Gossypium lobatum]
Gosto.005G384700-1	MBA0566618.1	61.333	75	26	1	418	633	23	97	7.68e-19	96.3	68	hypothetical protein [Gossypium lobatum]
Gosto.005G384700-1	MBA0566618.1	61.644	73	25	1	1189	1398	25	97	1.24e-16	90.1	68	hypothetical protein [Gossypium lobatum]
Gosto.005G384700-1	KAB2031487.1	69.101	178	47	4	676	1185	1	178	9.57e-69	233	68	hypothetical protein ES319_D05G308000v1 [Gossypium barbadense]
Gosto.005G384700-1	KAB2031487.1	70.225	178	47	3	1441	1956	1	178	1.68e-62	217	68	hypothetical protein ES319_D05G308000v1 [Gossypium barbadense]
Gosto.005G384700-1	KAB2031487.1	64	75	24	1	418	633	23	97	3.58e-20	100	68	hypothetical protein ES319_D05G308000v1 [Gossypium barbadense]
Gosto.005G384700-1	KAB2031487.1	64.384	73	23	1	1189	1398	25	97	6.21e-18	93.6	68	hypothetical protein ES319_D05G308000v1 [Gossypium barbadense]
Gosto.005G384700-1	MBA0776912.1	86.923	130	17	0	808	1197	1	130	1.24e-67	228	36	hypothetical protein [Gossypium trilobum]
Gosto.005G384700-1	MBA0776912.1	80.469	128	23	1	1573	1956	1	126	2.26e-59	206	36	hypothetical protein [Gossypium trilobum]
Gosto.005G384700-1	XP_017637239.1	86.923	130	17	0	808	1197	1	130	1.44e-67	228	36	PREDICTED: dirigent protein 4-like [Gossypium arboreum]
Gosto.005G384700-1	XP_017637239.1	82.031	128	21	1	1573	1956	1	126	1.96e-60	209	36	PREDICTED: dirigent protein 4-like [Gossypium arboreum]
Gosto.005G384700-1	PPD96950.1	78.417	139	28	1	676	1086	1	139	1.01e-66	227	60	hypothetical protein GOBAR_DD06006 [Gossypium barbadense]
Gosto.005G384700-1	PPD96950.1	80.576	139	27	0	1441	1857	1	139	1.37e-61	213	60	hypothetical protein GOBAR_DD06006 [Gossypium barbadense]
Gosto.005G384700-1	PPD96950.1	73.75	80	21	0	394	633	13	92	1.06e-29	126	60	hypothetical protein GOBAR_DD06006 [Gossypium barbadense]
Gosto.005G384700-1	PPD96950.1	77.465	71	16	0	1186	1398	22	92	4.41e-26	115	60	hypothetical protein GOBAR_DD06006 [Gossypium barbadense]
Gosto.005G384700-1	TYH21048.1	85.385	130	19	0	808	1197	1	130	4.22e-66	224	36	hypothetical protein ES288_A04G011500v1 [Gossypium darwinii]
Gosto.005G384700-1	TYH21048.1	80.469	128	23	1	1573	1956	1	126	6.46e-59	205	36	hypothetical protein ES288_A04G011500v1 [Gossypium darwinii]
Gosto.005G384700-1	KJB60486.1	83.594	128	21	0	1573	1956	1	128	5.17e-66	224	43	hypothetical protein B456_009G308100 [Gossypium raimondii]
Gosto.005G384700-1	KJB60486.1	78.03	132	27	1	808	1197	1	132	1.68e-59	207	43	hypothetical protein B456_009G308100 [Gossypium raimondii]
Gosto.005G384700-1	KJB60486.1	77.083	48	11	0	490	633	1	48	3.25e-13	78.6	43	hypothetical protein B456_009G308100 [Gossypium raimondii]
Gosto.005G384700-1	XP_017630291.1	62.703	185	58	4	676	1197	1	185	6.5e-65	223	70	PREDICTED: dirigent protein 4-like [Gossypium arboreum]
Gosto.005G384700-1	XP_017630291.1	65.574	183	54	3	1441	1962	1	183	2.49e-57	203	70	PREDICTED: dirigent protein 4-like [Gossypium arboreum]
Gosto.005G384700-1	XP_017630291.1	60.241	83	30	1	394	633	13	95	4.01e-21	102	70	PREDICTED: dirigent protein 4-like [Gossypium arboreum]
Gosto.005G384700-1	XP_017630291.1	63.514	74	24	1	1186	1398	22	95	1.76e-18	95.5	70	PREDICTED: dirigent protein 4-like [Gossypium arboreum]
Gosto.005G384700-1	XP_012453199.1	62.162	185	59	4	676	1197	1	185	7.21e-65	223	70	PREDICTED: dirigent protein 4-like [Gossypium raimondii]
Gosto.005G384700-1	XP_012453199.1	65.027	183	55	3	1441	1962	1	183	7.89e-59	207	70	PREDICTED: dirigent protein 4-like [Gossypium raimondii]
Gosto.005G384700-1	XP_012453199.1	60.241	83	30	1	394	633	13	95	7.51e-21	102	70	PREDICTED: dirigent protein 4-like [Gossypium raimondii]
Gosto.005G384700-1	XP_012453199.1	63.514	74	24	1	1186	1398	22	95	4.3e-18	94.4	70	PREDICTED: dirigent protein 4-like [Gossypium raimondii]
Gosto.005G384700-1	XP_012453200.1	62.162	185	59	4	676	1197	1	185	7.68e-65	223	69	PREDICTED: dirigent protein 4-like [Gossypium raimondii]
Gosto.005G384700-1	XP_012453200.1	66.12	183	53	3	1441	1962	1	183	5e-58	205	69	PREDICTED: dirigent protein 4-like [Gossypium raimondii]
Gosto.005G384700-1	XP_012453200.1	63.636	77	25	1	412	633	19	95	1.07e-20	101	69	PREDICTED: dirigent protein 4-like [Gossypium raimondii]
Gosto.005G384700-1	XP_012453200.1	52.577	97	40	2	1117	1398	2	95	1.66e-18	95.5	69	PREDICTED: dirigent protein 4-like [Gossypium raimondii]
Gosto.005G384700-1	PPD77868.1	62.162	185	59	4	676	1197	1	185	1.5e-64	222	69	hypothetical protein GOBAR_DD25205 [Gossypium barbadense]
Gosto.005G384700-1	PPD77868.1	66.12	183	53	3	1441	1962	1	183	4.14e-57	202	69	hypothetical protein GOBAR_DD25205 [Gossypium barbadense]
Gosto.005G384700-1	PPD77868.1	63.636	77	25	1	412	633	19	95	6.2e-21	102	69	hypothetical protein GOBAR_DD25205 [Gossypium barbadense]
Gosto.005G384700-1	PPD77868.1	52.577	97	40	2	1117	1398	2	95	1.53e-18	95.5	69	hypothetical protein GOBAR_DD25205 [Gossypium barbadense]
Gosto.005G384700-1	MBA0625456.1	88.43	121	14	0	835	1197	1	121	4.22e-64	219	34	hypothetical protein [Gossypium davidsonii]
Gosto.005G384700-1	MBA0625456.1	82.353	119	19	1	1600	1956	1	117	1.42e-56	199	34	hypothetical protein [Gossypium davidsonii]
Gosto.005G384700-1	MBA0775979.1	61.957	184	24	1	676	1089	1	184	9.24e-64	220	60	hypothetical protein [Gossypium trilobum]
Gosto.005G384700-1	MBA0775979.1	63.587	184	23	1	1441	1860	1	184	3.18e-56	200	60	hypothetical protein [Gossypium trilobum]
Gosto.005G384700-1	MBA0775979.1	76.25	80	19	0	394	633	13	92	3.71e-30	128	60	hypothetical protein [Gossypium trilobum]
Gosto.005G384700-1	MBA0775979.1	78.873	71	15	0	1186	1398	22	92	3.79e-26	117	60	hypothetical protein [Gossypium trilobum]
Gosto.005G384700-1	TYJ16502.1	62.162	185	59	4	676	1197	1	185	1.03e-63	220	70	hypothetical protein E1A91_A10G258000v1 [Gossypium mustelinum]
Gosto.005G384700-1	TYJ16502.1	65.027	183	55	3	1441	1962	1	183	3.56e-56	200	70	hypothetical protein E1A91_A10G258000v1 [Gossypium mustelinum]
Gosto.005G384700-1	TYJ16502.1	60.241	83	30	1	394	633	13	95	4.68e-21	102	70	hypothetical protein E1A91_A10G258000v1 [Gossypium mustelinum]
Gosto.005G384700-1	TYJ16502.1	63.514	74	24	1	1186	1398	22	95	1.97e-18	95.1	70	hypothetical protein E1A91_A10G258000v1 [Gossypium mustelinum]
Gosto.005G384700-1	MBA0660009.1	78.102	137	28	1	676	1080	1	137	1.11e-63	218	60	hypothetical protein [Gossypium klotzschianum]
Gosto.005G384700-1	MBA0660009.1	80.292	137	27	0	1441	1851	1	137	2.71e-58	204	60	hypothetical protein [Gossypium klotzschianum]
Gosto.005G384700-1	MBA0660009.1	76.25	80	19	0	394	633	13	92	8.27e-31	129	60	hypothetical protein [Gossypium klotzschianum]
Gosto.005G384700-1	MBA0660009.1	78.873	71	15	0	1186	1398	22	92	1.25e-26	117	60	hypothetical protein [Gossypium klotzschianum]
Gosto.005G384700-1	KAE8698718.1	59.239	184	65	4	676	1197	1	184	3.52e-63	219	66	Dirigent protein 4 [Hibiscus syriacus]
Gosto.005G384700-1	KAE8698718.1	60.736	163	53	4	1495	1956	20	180	1.14e-52	191	66	Dirigent protein 4 [Hibiscus syriacus]
Gosto.005G384700-1	KAE8698718.1	51.282	78	33	2	409	633	19	94	2.51e-12	77.8	66	Dirigent protein 4 [Hibiscus syriacus]
Gosto.005G384700-1	KAE8698718.1	45.361	97	46	3	1117	1398	2	94	9.16e-12	75.9	66	Dirigent protein 4 [Hibiscus syriacus]
Gosto.005G384700-1	TYI62977.1	61.081	185	61	4	676	1197	1	185	4.57e-63	218	70	hypothetical protein E1A91_D10G287400v1 [Gossypium mustelinum]
Gosto.005G384700-1	TYI62977.1	66.667	183	52	3	1441	1962	1	183	1.67e-60	211	70	hypothetical protein E1A91_D10G287400v1 [Gossypium mustelinum]
Gosto.005G384700-1	TYI62977.1	63.855	83	27	1	394	633	13	95	7.7e-24	110	70	hypothetical protein E1A91_D10G287400v1 [Gossypium mustelinum]
Gosto.005G384700-1	TYI62977.1	64.865	74	23	1	1186	1398	22	95	2.01e-19	98.2	70	hypothetical protein E1A91_D10G287400v1 [Gossypium mustelinum]
Gosto.005G384700-1	KAB2086158.1	90.435	115	11	0	676	1020	1	115	5.14e-63	216	57	hypothetical protein ES319_A04G009600v1 [Gossypium barbadense]
Gosto.005G384700-1	KAB2086158.1	79.487	117	22	1	1441	1791	1	115	1.64e-45	169	57	hypothetical protein ES319_A04G009600v1 [Gossypium barbadense]
Gosto.005G384700-1	KAB2086158.1	63.83	94	29	2	1117	1398	2	90	2.41e-26	115	57	hypothetical protein ES319_A04G009600v1 [Gossypium barbadense]
Gosto.005G384700-1	KAB2086158.1	73.077	78	19	1	400	633	15	90	5.75e-26	114	57	hypothetical protein ES319_A04G009600v1 [Gossypium barbadense]
Gosto.005G384700-1	KAB2010809.1	61.081	185	61	4	676	1197	1	185	5.69e-63	218	70	hypothetical protein ES319_D10G269000v1 [Gossypium barbadense]
Gosto.005G384700-1	KAB2010809.1	66.667	183	52	3	1441	1962	1	183	2.33e-60	211	70	hypothetical protein ES319_D10G269000v1 [Gossypium barbadense]
Gosto.005G384700-1	KAB2010809.1	63.855	83	27	1	394	633	13	95	4.66e-24	111	70	hypothetical protein ES319_D10G269000v1 [Gossypium barbadense]
Gosto.005G384700-1	KAB2010809.1	64.865	74	23	1	1186	1398	22	95	2.76e-19	97.8	70	hypothetical protein ES319_D10G269000v1 [Gossypium barbadense]
Gosto.005G384700-1	XP_016718406.1	96.262	107	4	0	676	996	1	107	1.35e-62	214	55	PREDICTED: dirigent protein 4-like [Gossypium hirsutum]
Gosto.005G384700-1	XP_016718406.1	82.569	109	17	1	1441	1767	1	107	3.54e-41	156	55	PREDICTED: dirigent protein 4-like [Gossypium hirsutum]
Gosto.005G384700-1	XP_016718406.1	73.75	80	19	1	394	633	13	90	9.09e-28	119	55	PREDICTED: dirigent protein 4-like [Gossypium hirsutum]
Gosto.005G384700-1	XP_016718406.1	64.894	94	28	2	1117	1398	2	90	1.34e-27	119	55	PREDICTED: dirigent protein 4-like [Gossypium hirsutum]
Gosto.005G384700-1	XP_012453198.1	61.081	185	61	4	676	1197	1	185	1.85e-62	217	70	PREDICTED: dirigent protein 4-like [Gossypium raimondii]
Gosto.005G384700-1	XP_012453198.1	66.667	183	52	3	1441	1962	1	183	6.12e-60	210	70	PREDICTED: dirigent protein 4-like [Gossypium raimondii]
Gosto.005G384700-1	XP_012453198.1	63.855	83	27	1	394	633	13	95	4.38e-23	108	70	PREDICTED: dirigent protein 4-like [Gossypium raimondii]
Gosto.005G384700-1	XP_012453198.1	66.216	74	22	1	1186	1398	22	95	6.7e-20	99.4	70	PREDICTED: dirigent protein 4-like [Gossypium raimondii]
Gosto.005G384700-1	XP_016722986.1	60.541	185	62	4	676	1197	1	185	5.53e-62	216	70	PREDICTED: dirigent protein 4-like [Gossypium hirsutum]
Gosto.005G384700-1	XP_016722986.1	66.12	183	53	3	1441	1962	1	183	1.68e-59	209	70	PREDICTED: dirigent protein 4-like [Gossypium hirsutum]
Gosto.005G384700-1	XP_016722986.1	62.651	83	28	1	394	633	13	95	1.14e-22	107	70	PREDICTED: dirigent protein 4-like [Gossypium hirsutum]
Gosto.005G384700-1	XP_016722986.1	64.865	74	23	1	1186	1398	22	95	1.67e-19	98.2	70	PREDICTED: dirigent protein 4-like [Gossypium hirsutum]
Gosto.005G384700-1	MBA0809810.1	76.812	138	30	1	676	1083	1	138	7.77e-62	213	63	hypothetical protein [Gossypium harknessii]
Gosto.005G384700-1	MBA0809810.1	81.884	138	25	0	1441	1854	1	138	1.25e-53	191	63	hypothetical protein [Gossypium harknessii]
Gosto.005G384700-1	MBA0809810.1	73.077	78	21	0	400	633	15	92	1.39e-20	99.8	63	hypothetical protein [Gossypium harknessii]
Gosto.005G384700-1	MBA0809810.1	60.638	94	34	1	1117	1398	2	92	2.17e-20	99.4	63	hypothetical protein [Gossypium harknessii]
Gosto.005G384700-1	KAE8724697.1	59.016	183	66	3	676	1197	1	183	2.66e-60	211	57	dirigent protein 23-like [Hibiscus syriacus]
Gosto.005G384700-1	KAE8724697.1	61.585	164	52	4	1492	1956	18	179	2.71e-50	184	57	dirigent protein 23-like [Hibiscus syriacus]
Gosto.005G384700-1	KAE8724697.1	55.844	77	29	2	412	633	19	93	6.22e-13	79.3	57	dirigent protein 23-like [Hibiscus syriacus]
Gosto.005G384700-1	TYJ16501.1	59.459	185	64	4	676	1197	1	185	1.38e-59	209	67	hypothetical protein E1A91_A10G257900v1 [Gossypium mustelinum]
Gosto.005G384700-1	TYJ16501.1	61.446	166	55	3	1492	1962	18	183	3.19e-55	197	67	hypothetical protein E1A91_A10G257900v1 [Gossypium mustelinum]
Gosto.005G384700-1	TYJ16501.1	61.446	83	29	1	394	633	13	95	4.04e-22	105	67	hypothetical protein E1A91_A10G257900v1 [Gossypium mustelinum]
Gosto.005G384700-1	TYJ16501.1	60.811	74	26	1	1186	1398	22	95	2.3e-17	92	67	hypothetical protein E1A91_A10G257900v1 [Gossypium mustelinum]
Gosto.005G384700-1	KAB2063951.1	58.919	185	65	4	676	1197	1	185	3.55e-59	208	67	hypothetical protein ES319_A10G254500v1 [Gossypium barbadense]
Gosto.005G384700-1	KAB2063951.1	60.843	166	56	3	1492	1962	18	183	3.02e-54	195	67	hypothetical protein ES319_A10G254500v1 [Gossypium barbadense]
Gosto.005G384700-1	KAB2063951.1	61.446	83	29	1	394	633	13	95	4.71e-22	105	67	hypothetical protein ES319_A10G254500v1 [Gossypium barbadense]
Gosto.005G384700-1	KAB2063951.1	60.811	74	26	1	1186	1398	22	95	2.5e-17	92	67	hypothetical protein ES319_A10G254500v1 [Gossypium barbadense]
Gosto.005G384700-1	XP_016670295.1	59.444	180	62	4	691	1197	1	180	1.49e-58	206	67	PREDICTED: dirigent protein 4-like [Gossypium hirsutum]
Gosto.005G384700-1	XP_016670295.1	61.446	166	55	3	1492	1962	13	178	1.57e-55	198	67	PREDICTED: dirigent protein 4-like [Gossypium hirsutum]
Gosto.005G384700-1	XP_016670295.1	61.446	83	29	1	394	633	8	90	4.17e-22	105	67	PREDICTED: dirigent protein 4-like [Gossypium hirsutum]
Gosto.005G384700-1	XP_016670295.1	60.811	74	26	1	1186	1398	17	90	2.19e-17	92	67	PREDICTED: dirigent protein 4-like [Gossypium hirsutum]
Gosto.005G384700-1	TYI96093.1	60.109	183	63	5	676	1197	1	182	6.39e-58	204	69	hypothetical protein E1A91_D01G046000v1 [Gossypium mustelinum]
Gosto.005G384700-1	TYI96093.1	61.749	183	58	5	1441	1962	1	180	9.43e-51	185	69	hypothetical protein E1A91_D01G046000v1 [Gossypium mustelinum]
Gosto.005G384700-1	TYI96093.1	55.556	81	30	2	400	633	15	92	1.18e-15	87	69	hypothetical protein E1A91_D01G046000v1 [Gossypium mustelinum]
Gosto.005G384700-1	TYI96093.1	48.454	97	41	3	1117	1398	2	92	1.41e-13	81.3	69	hypothetical protein E1A91_D01G046000v1 [Gossypium mustelinum]
Gosto.005G384700-1	XP_012469054.1	60.109	183	63	5	676	1197	1	182	7.23e-58	204	69	PREDICTED: dirigent protein 4-like [Gossypium raimondii]
Gosto.005G384700-1	XP_012469054.1	61.749	183	58	5	1441	1962	1	180	1.22e-50	185	69	PREDICTED: dirigent protein 4-like [Gossypium raimondii]
Gosto.005G384700-1	XP_012469054.1	55.556	81	30	2	400	633	15	92	1.16e-15	87	69	PREDICTED: dirigent protein 4-like [Gossypium raimondii]
Gosto.005G384700-1	XP_012469054.1	48.454	97	41	3	1117	1398	2	92	1.43e-13	81.3	69	PREDICTED: dirigent protein 4-like [Gossypium raimondii]
Gosto.005G384700-1	MBA0733545.1	60.109	183	63	5	676	1197	1	182	2.08e-57	203	69	hypothetical protein [Gossypium gossypioides]
Gosto.005G384700-1	MBA0733545.1	61.749	183	58	5	1441	1962	1	180	4e-50	184	69	hypothetical protein [Gossypium gossypioides]
Gosto.005G384700-1	MBA0733545.1	55.556	81	30	2	400	633	15	92	1.16e-15	87	69	hypothetical protein [Gossypium gossypioides]
Gosto.005G384700-1	MBA0733545.1	48.454	97	41	3	1117	1398	2	92	1.12e-13	81.6	69	hypothetical protein [Gossypium gossypioides]
Gosto.005G384700-1	XP_016714714.1	60.674	178	60	5	676	1182	1	177	2.47e-57	203	69	PREDICTED: dirigent protein 4-like [Gossypium hirsutum]
Gosto.005G384700-1	XP_016714714.1	62.011	179	56	5	1441	1950	1	176	1.58e-49	182	69	PREDICTED: dirigent protein 4-like [Gossypium hirsutum]
Gosto.005G384700-1	XP_016714714.1	55.556	81	30	2	400	633	15	92	9.28e-16	87.4	69	PREDICTED: dirigent protein 4-like [Gossypium hirsutum]
Gosto.005G384700-1	XP_016714714.1	48.454	97	41	3	1117	1398	2	92	1.17e-13	81.3	69	PREDICTED: dirigent protein 4-like [Gossypium hirsutum]
Gosto.005G384700-1	XP_017641385.1	59.563	183	64	5	676	1197	1	182	3.88e-57	202	69	PREDICTED: dirigent protein 4-like [Gossypium arboreum]
Gosto.005G384700-1	XP_017641385.1	61.202	183	59	5	1441	1962	1	180	2.73e-49	181	69	PREDICTED: dirigent protein 4-like [Gossypium arboreum]
Gosto.005G384700-1	XP_017641385.1	54.321	81	31	2	400	633	15	92	4.66e-15	85.5	69	PREDICTED: dirigent protein 4-like [Gossypium arboreum]
Gosto.005G384700-1	XP_017641385.1	49.485	97	40	3	1117	1398	2	92	1.18e-13	81.3	69	PREDICTED: dirigent protein 4-like [Gossypium arboreum]
Gosto.005G384700-1	MBA0848427.1	60.894	179	60	5	676	1185	1	178	4.12e-57	202	69	hypothetical protein [Gossypium schwendimanii]
Gosto.005G384700-1	MBA0848427.1	61.202	183	59	5	1441	1962	1	180	8.34e-50	182	69	hypothetical protein [Gossypium schwendimanii]
Gosto.005G384700-1	MBA0848427.1	54.321	81	31	2	400	633	15	92	6.19e-15	85.1	69	hypothetical protein [Gossypium schwendimanii]
Gosto.005G384700-1	MBA0848427.1	47.423	97	42	3	1117	1398	2	92	6.93e-13	79.3	69	hypothetical protein [Gossypium schwendimanii]
Gosto.005G384700-1	PPS13553.1	55.556	189	73	4	664	1197	54	242	7.24e-57	204	70	hypothetical protein GOBAR_AA07034 [Gossypium barbadense]
Gosto.005G384700-1	PPS13553.1	56.757	185	71	3	1429	1956	54	238	5.38e-49	183	70	hypothetical protein GOBAR_AA07034 [Gossypium barbadense]
Gosto.005G384700-1	PPS13553.1	56.79	81	32	1	400	633	72	152	5.24e-17	92.8	70	hypothetical protein GOBAR_AA07034 [Gossypium barbadense]
Gosto.005G384700-1	PPS13553.1	55.405	74	30	1	1186	1398	79	152	6.41e-13	80.9	70	hypothetical protein GOBAR_AA07034 [Gossypium barbadense]
Gosto.005G384700-1	MBA0625460.1	85.217	115	17	0	853	1197	1	115	8.48e-57	199	32	hypothetical protein [Gossypium davidsonii]
Gosto.005G384700-1	MBA0625460.1	81.416	113	19	1	1618	1956	1	111	4.52e-51	184	32	hypothetical protein [Gossypium davidsonii]
Gosto.005G384700-1	MBA0865947.1	75.182	137	4	1	676	1086	1	107	1.26e-56	198	39	hypothetical protein [Gossypium schwendimanii]
Gosto.005G384700-1	MBA0865947.1	67.626	139	13	1	1441	1857	1	107	1.44e-39	152	39	hypothetical protein [Gossypium schwendimanii]
Gosto.005G384700-1	KAB2043778.1	59.016	183	65	5	676	1197	1	182	1.79e-56	201	69	hypothetical protein ES319_D01G042600v1 [Gossypium barbadense]
Gosto.005G384700-1	KAB2043778.1	60.656	183	60	5	1441	1962	1	180	3.09e-50	184	69	hypothetical protein ES319_D01G042600v1 [Gossypium barbadense]
Gosto.005G384700-1	KAB2043778.1	55.844	77	28	2	412	633	19	92	3.17e-15	85.9	69	hypothetical protein ES319_D01G042600v1 [Gossypium barbadense]
Gosto.005G384700-1	KAB2043778.1	55.405	74	27	2	1186	1398	22	92	4.88e-13	79.7	69	hypothetical protein ES319_D01G042600v1 [Gossypium barbadense]
Gosto.005G384700-1	MBA0661023.1	84.348	115	18	0	853	1197	1	115	2.51e-56	198	32	hypothetical protein [Gossypium klotzschianum]
Gosto.005G384700-1	MBA0661023.1	84.071	113	16	1	1618	1956	1	111	1.83e-53	190	32	hypothetical protein [Gossypium klotzschianum]
Gosto.005G384700-1	MBA0675875.1	59.016	183	65	5	676	1197	1	182	2.52e-56	200	69	hypothetical protein [Gossypium aridum]
Gosto.005G384700-1	MBA0675875.1	60.656	183	60	5	1441	1962	1	180	4.61e-50	183	69	hypothetical protein [Gossypium aridum]
Gosto.005G384700-1	MBA0675875.1	55.844	77	28	2	412	633	19	92	4.23e-15	85.5	69	hypothetical protein [Gossypium aridum]
Gosto.005G384700-1	MBA0675875.1	55.405	74	27	2	1186	1398	22	92	6.76e-13	79.3	69	hypothetical protein [Gossypium aridum]
Gosto.005G384700-1	MBA0793103.1	56.757	185	69	4	676	1197	1	185	3.15e-56	200	69	hypothetical protein [Gossypium harknessii]
Gosto.005G384700-1	MBA0793103.1	58.564	181	66	3	1441	1956	1	181	1.82e-49	182	69	hypothetical protein [Gossypium harknessii]
Gosto.005G384700-1	MBA0793103.1	58.025	81	31	1	400	633	15	95	3.58e-18	94.4	69	hypothetical protein [Gossypium harknessii]
Gosto.005G384700-1	MBA0793103.1	56.757	74	29	1	1186	1398	22	95	3.69e-14	82.8	69	hypothetical protein [Gossypium harknessii]
Gosto.005G384700-1	KAB2095532.1	58.47	183	66	5	676	1197	1	182	3.74e-56	200	69	hypothetical protein ES319_A01G044300v1 [Gossypium barbadense]
Gosto.005G384700-1	KAB2095532.1	60.109	183	61	5	1441	1962	1	180	1.76e-49	182	69	hypothetical protein ES319_A01G044300v1 [Gossypium barbadense]
Gosto.005G384700-1	KAB2095532.1	53.086	81	32	2	400	633	15	92	1.13e-14	84.3	69	hypothetical protein ES319_A01G044300v1 [Gossypium barbadense]
Gosto.005G384700-1	KAB2095532.1	46.392	97	43	3	1117	1398	2	92	2e-12	77.8	69	hypothetical protein ES319_A01G044300v1 [Gossypium barbadense]
Gosto.005G384700-1	MBA0551027.1	49.351	231	86	6	676	1275	1	231	5.53e-56	201	69	hypothetical protein [Gossypium lobatum]
Gosto.005G384700-1	MBA0551027.1	58.011	181	67	3	1441	1956	1	181	2.03e-48	181	69	hypothetical protein [Gossypium lobatum]
Gosto.005G384700-1	MBA0551027.1	56.79	81	32	1	400	633	15	95	3.81e-17	92.8	69	hypothetical protein [Gossypium lobatum]
Gosto.005G384700-1	MBA0551027.1	55.405	74	30	1	1186	1398	22	95	3.4e-13	81.3	69	hypothetical protein [Gossypium lobatum]
Gosto.005G384700-1	TYI62978.1	57.838	185	57	5	676	1197	1	175	7.96e-56	199	64	hypothetical protein E1A91_D10G287500v1 [Gossypium mustelinum]
Gosto.005G384700-1	TYI62978.1	62.025	158	51	3	1516	1962	16	173	2.17e-50	184	64	hypothetical protein E1A91_D10G287500v1 [Gossypium mustelinum]
Gosto.005G384700-1	TYI62978.1	63.636	66	21	1	445	633	20	85	8.5e-16	87.4	64	hypothetical protein E1A91_D10G287500v1 [Gossypium mustelinum]
Gosto.005G384700-1	TYI62978.1	61.429	70	24	1	1198	1398	16	85	1e-14	84.3	64	hypothetical protein E1A91_D10G287500v1 [Gossypium mustelinum]
Gosto.005G384700-1	MBA0818198.1	59.016	183	65	5	676	1197	1	182	8.82e-56	199	69	hypothetical protein [Gossypium harknessii]
Gosto.005G384700-1	MBA0818198.1	60.109	183	61	5	1441	1962	1	180	8.87e-48	177	69	hypothetical protein [Gossypium harknessii]
Gosto.005G384700-1	MBA0818198.1	51.852	81	33	2	400	633	15	92	2.49e-13	80.5	69	hypothetical protein [Gossypium harknessii]
Gosto.005G384700-1	MBA0818198.1	45.361	97	44	3	1117	1398	2	92	1.53e-11	75.5	69	hypothetical protein [Gossypium harknessii]
Gosto.005G384700-1	TYG83866.1	56.757	185	69	4	676	1197	1	185	8.95e-56	199	69	hypothetical protein ES288_D01G202700v1 [Gossypium darwinii]
Gosto.005G384700-1	TYG83866.1	58.564	181	66	3	1441	1956	1	181	5.49e-49	181	69	hypothetical protein ES288_D01G202700v1 [Gossypium darwinii]
Gosto.005G384700-1	TYG83866.1	58.025	81	31	1	400	633	15	95	3.94e-18	94.4	69	hypothetical protein ES288_D01G202700v1 [Gossypium darwinii]
Gosto.005G384700-1	TYG83866.1	56.757	74	29	1	1186	1398	22	95	4.03e-14	82.8	69	hypothetical protein ES288_D01G202700v1 [Gossypium darwinii]
Gosto.005G384700-1	XP_012469142.1	56.216	185	70	4	676	1197	1	185	9.82e-56	199	69	PREDICTED: dirigent protein 4-like [Gossypium raimondii]
Gosto.005G384700-1	XP_012469142.1	58.011	181	67	3	1441	1956	1	181	1.55e-49	182	69	PREDICTED: dirigent protein 4-like [Gossypium raimondii]
Gosto.005G384700-1	XP_012469142.1	58.025	81	31	1	400	633	15	95	3.65e-18	94.4	69	PREDICTED: dirigent protein 4-like [Gossypium raimondii]
Gosto.005G384700-1	XP_012469142.1	56.757	74	29	1	1186	1398	22	95	3.52e-14	83.2	69	PREDICTED: dirigent protein 4-like [Gossypium raimondii]
Gosto.005G384700-1	TYH88679.1	56.757	185	69	4	676	1197	1	185	1.26e-55	199	69	hypothetical protein ES332_D01G204600v1 [Gossypium tomentosum]
Gosto.005G384700-1	TYH88679.1	58.564	181	66	3	1441	1956	1	181	6.2e-49	181	69	hypothetical protein ES332_D01G204600v1 [Gossypium tomentosum]
Gosto.005G384700-1	TYH88679.1	58.025	81	31	1	400	633	15	95	4.22e-18	94.4	69	hypothetical protein ES332_D01G204600v1 [Gossypium tomentosum]
Gosto.005G384700-1	TYH88679.1	56.757	74	29	1	1186	1398	22	95	4.19e-14	82.8	69	hypothetical protein ES332_D01G204600v1 [Gossypium tomentosum]
Gosto.005G384700-1	MBA0677025.1	56.216	185	70	4	676	1197	1	185	1.44e-55	198	69	hypothetical protein [Gossypium aridum]
Gosto.005G384700-1	MBA0677025.1	58.011	181	67	3	1441	1956	1	181	7.85e-49	180	69	hypothetical protein [Gossypium aridum]
Gosto.005G384700-1	MBA0677025.1	56.79	81	32	1	400	633	15	95	1.39e-17	92.8	69	hypothetical protein [Gossypium aridum]
Gosto.005G384700-1	MBA0677025.1	55.405	74	30	1	1186	1398	22	95	1.4e-13	81.3	69	hypothetical protein [Gossypium aridum]
Gosto.005G384700-1	XP_016721698.1	57.923	183	67	5	676	1197	1	182	2.19e-55	198	69	PREDICTED: dirigent protein 4-like [Gossypium hirsutum]
Gosto.005G384700-1	XP_016721698.1	60.109	183	61	5	1441	1962	1	180	5.25e-49	181	69	PREDICTED: dirigent protein 4-like [Gossypium hirsutum]
Gosto.005G384700-1	XP_016721698.1	53.086	81	32	2	400	633	15	92	2.92e-14	83.2	69	PREDICTED: dirigent protein 4-like [Gossypium hirsutum]
Gosto.005G384700-1	XP_016721698.1	46.392	97	43	3	1117	1398	2	92	5.48e-12	76.6	69	PREDICTED: dirigent protein 4-like [Gossypium hirsutum]
Gosto.005G384700-1	MBA0823842.1	56.216	185	70	4	676	1197	1	185	3.09e-55	197	69	hypothetical protein [Gossypium armourianum]
Gosto.005G384700-1	MBA0823842.1	58.011	181	67	3	1441	1956	1	181	1.79e-48	179	69	hypothetical protein [Gossypium armourianum]
Gosto.005G384700-1	MBA0823842.1	58.025	81	31	1	400	633	15	95	3.65e-18	94.4	69	hypothetical protein [Gossypium armourianum]
Gosto.005G384700-1	MBA0823842.1	56.757	74	29	1	1186	1398	22	95	3.77e-14	82.8	69	hypothetical protein [Gossypium armourianum]
Gosto.005G384700-1	MBA0607618.1	56.216	185	70	4	676	1197	1	185	3.72e-55	197	69	hypothetical protein [Gossypium davidsonii]
Gosto.005G384700-1	MBA0607618.1	58.011	181	67	3	1441	1956	1	181	2.05e-48	179	69	hypothetical protein [Gossypium davidsonii]
Gosto.005G384700-1	MBA0607618.1	56.79	81	32	1	400	633	15	95	3.97e-17	91.7	69	hypothetical protein [Gossypium davidsonii]
Gosto.005G384700-1	MBA0607618.1	55.405	74	30	1	1186	1398	22	95	4.66e-13	79.7	69	hypothetical protein [Gossypium davidsonii]
Gosto.005G384700-1	MBA0848389.1	55.676	185	71	4	676	1197	1	185	4.3e-55	197	69	hypothetical protein [Gossypium schwendimanii]
Gosto.005G384700-1	MBA0848389.1	57.459	181	68	3	1441	1956	1	181	2.54e-48	179	69	hypothetical protein [Gossypium schwendimanii]
Gosto.005G384700-1	MBA0848389.1	55.556	81	33	1	400	633	15	95	4.01e-17	91.7	69	hypothetical protein [Gossypium schwendimanii]
Gosto.005G384700-1	MBA0848389.1	55.405	74	30	1	1186	1398	22	95	2.33e-13	80.5	69	hypothetical protein [Gossypium schwendimanii]
Gosto.005G384700-1	PPD94916.1	56.216	185	70	4	676	1197	1	185	5.02e-55	197	69	hypothetical protein GOBAR_DD08064 [Gossypium barbadense]
Gosto.005G384700-1	PPD94916.1	58.011	181	67	3	1441	1956	1	181	2.81e-48	179	69	hypothetical protein GOBAR_DD08064 [Gossypium barbadense]
Gosto.005G384700-1	PPD94916.1	56.79	81	32	1	400	633	15	95	1.93e-17	92.4	69	hypothetical protein GOBAR_DD08064 [Gossypium barbadense]
Gosto.005G384700-1	PPD94916.1	55.405	74	30	1	1186	1398	22	95	1.98e-13	80.9	69	hypothetical protein GOBAR_DD08064 [Gossypium barbadense]
Gosto.005G384700-1	KJB74042.1	57.297	185	58	5	676	1197	1	175	7.12e-55	196	64	hypothetical protein B456_011G281700 [Gossypium raimondii]
Gosto.005G384700-1	KJB74042.1	62.025	158	51	3	1516	1962	16	173	2e-50	184	64	hypothetical protein B456_011G281700 [Gossypium raimondii]
Gosto.005G384700-1	KJB74042.1	61.765	68	23	1	439	633	18	85	2.23e-15	86.3	64	hypothetical protein B456_011G281700 [Gossypium raimondii]
Gosto.005G384700-1	KJB74042.1	61.429	70	24	1	1198	1398	16	85	9.08e-15	84.3	64	hypothetical protein B456_011G281700 [Gossypium raimondii]
Gosto.005G384700-1	XP_017625820.1	54.645	183	70	4	676	1197	1	179	8.35e-55	196	60	PREDICTED: dirigent protein 4-like [Gossypium arboreum]
Gosto.005G384700-1	XP_017625820.1	55.249	181	66	4	1441	1956	1	175	3.7e-46	173	60	PREDICTED: dirigent protein 4-like [Gossypium arboreum]
Gosto.005G384700-1	XP_017625820.1	46.988	83	35	2	394	633	13	89	5.69e-11	73.6	60	PREDICTED: dirigent protein 4-like [Gossypium arboreum]
Gosto.005G384700-1	XP_016729174.1	54.645	183	70	4	676	1197	1	179	9.07e-55	196	49	PREDICTED: dirigent protein 4-like [Gossypium hirsutum]
Gosto.005G384700-1	XP_016729174.1	54.645	183	68	4	1441	1962	1	177	4.81e-46	172	49	PREDICTED: dirigent protein 4-like [Gossypium hirsutum]
Gosto.005G384700-1	KAB2071669.1	54.645	183	70	4	676	1197	1	179	1.13e-54	196	49	hypothetical protein ES319_A08G238500v1 [Gossypium barbadense]
Gosto.005G384700-1	KAB2071669.1	55.249	181	66	4	1441	1956	1	175	4.72e-46	172	49	hypothetical protein ES319_A08G238500v1 [Gossypium barbadense]
Gosto.005G384700-1	KAB2071671.1	54.645	183	70	4	676	1197	1	179	1.15e-54	196	60	hypothetical protein ES319_A08G238700v1 [Gossypium barbadense]
Gosto.005G384700-1	KAB2071671.1	55.249	181	66	4	1441	1956	1	175	4.96e-46	172	60	hypothetical protein ES319_A08G238700v1 [Gossypium barbadense]
Gosto.005G384700-1	KAB2071671.1	46.988	83	35	2	394	633	13	89	5.47e-11	73.6	60	hypothetical protein ES319_A08G238700v1 [Gossypium barbadense]
Gosto.005G384700-1	MBA0809809.1	81.25	128	24	0	1573	1956	1	128	1.33e-54	194	36	hypothetical protein [Gossypium harknessii]
Gosto.005G384700-1	MBA0809809.1	73.438	128	32	1	808	1185	1	128	4.39e-50	181	36	hypothetical protein [Gossypium harknessii]
Gosto.005G384700-1	KAB2010808.1	57.297	185	58	5	676	1197	1	175	1.42e-54	195	64	hypothetical protein ES319_D10G268900v1 [Gossypium barbadense]
Gosto.005G384700-1	KAB2010808.1	62.025	158	51	3	1516	1962	16	173	1.59e-49	182	64	hypothetical protein ES319_D10G268900v1 [Gossypium barbadense]
Gosto.005G384700-1	KAB2010808.1	63.636	66	21	1	445	633	20	85	8.84e-16	87.4	64	hypothetical protein ES319_D10G268900v1 [Gossypium barbadense]
Gosto.005G384700-1	KAB2010808.1	61.429	70	24	1	1198	1398	16	85	1.03e-14	84.3	64	hypothetical protein ES319_D10G268900v1 [Gossypium barbadense]
Gosto.005G384700-1	KAB2045819.1	56.216	185	70	4	676	1197	1	185	1.59e-54	196	69	hypothetical protein ES319_D01G188300v1 [Gossypium barbadense]
Gosto.005G384700-1	KAB2045819.1	58.011	181	67	3	1441	1956	1	181	8.71e-48	177	69	hypothetical protein ES319_D01G188300v1 [Gossypium barbadense]
Gosto.005G384700-1	KAB2045819.1	56.79	81	32	1	400	633	15	95	6.24e-17	90.9	69	hypothetical protein ES319_D01G188300v1 [Gossypium barbadense]
Gosto.005G384700-1	KAB2045819.1	55.405	74	30	1	1186	1398	22	95	7.24e-13	79.3	69	hypothetical protein ES319_D01G188300v1 [Gossypium barbadense]
Gosto.005G384700-1	XP_017622716.1	55.135	185	72	4	676	1197	1	185	2.56e-54	195	69	PREDICTED: dirigent protein 4-like [Gossypium arboreum]
Gosto.005G384700-1	XP_017622716.1	57.459	181	68	3	1441	1956	1	181	4.63e-48	178	69	PREDICTED: dirigent protein 4-like [Gossypium arboreum]
Gosto.005G384700-1	XP_017622716.1	56.79	81	32	1	400	633	15	95	1.79e-17	92.4	69	PREDICTED: dirigent protein 4-like [Gossypium arboreum]
Gosto.005G384700-1	XP_017622716.1	55.405	74	30	1	1186	1398	22	95	1.85e-13	80.9	69	PREDICTED: dirigent protein 4-like [Gossypium arboreum]
Gosto.005G384700-1	XP_016702441.1	55.135	185	72	4	676	1197	1	185	2.64e-54	195	69	PREDICTED: dirigent protein 4-like [Gossypium hirsutum]
Gosto.005G384700-1	XP_016702441.1	56.906	181	69	3	1441	1956	1	181	1.26e-47	177	69	PREDICTED: dirigent protein 4-like [Gossypium hirsutum]
Gosto.005G384700-1	XP_016702441.1	56.79	81	32	1	400	633	15	95	1.53e-17	92.8	69	PREDICTED: dirigent protein 4-like [Gossypium hirsutum]
Gosto.005G384700-1	XP_016702441.1	55.405	74	30	1	1186	1398	22	95	1.62e-13	81.3	69	PREDICTED: dirigent protein 4-like [Gossypium hirsutum]
Gosto.005G384700-1	MBA0760198.1	55.676	185	71	4	676	1197	1	185	2.87e-54	195	69	hypothetical protein [Gossypium trilobum]
Gosto.005G384700-1	MBA0760198.1	57.459	181	68	3	1441	1956	1	181	1.62e-47	177	69	hypothetical protein [Gossypium trilobum]
Gosto.005G384700-1	MBA0760198.1	55.556	81	33	1	400	633	15	95	2.69e-16	89	69	hypothetical protein [Gossypium trilobum]
Gosto.005G384700-1	MBA0760198.1	54.054	74	31	1	1186	1398	22	95	3.14e-12	77.4	69	hypothetical protein [Gossypium trilobum]
Gosto.005G384700-1	MBA0737506.1	54.098	183	71	4	676	1197	1	179	4.17e-54	194	60	hypothetical protein [Gossypium gossypioides]
Gosto.005G384700-1	MBA0737506.1	54.144	181	68	4	1441	1956	1	175	9.2e-45	169	60	hypothetical protein [Gossypium gossypioides]
Gosto.005G384700-1	MBA0737506.1	45.783	83	36	2	394	633	13	89	9.46e-11	72.8	60	hypothetical protein [Gossypium gossypioides]
Gosto.005G384700-1	TYI41845.1	57.377	183	68	5	676	1197	1	182	6.07e-54	194	60	hypothetical protein ES332_A01G054600v1 [Gossypium tomentosum]
Gosto.005G384700-1	TYI41845.1	59.016	183	63	5	1441	1962	1	180	2.75e-47	176	60	hypothetical protein ES332_A01G054600v1 [Gossypium tomentosum]
Gosto.005G384700-1	TYI41845.1	50.617	81	34	2	400	633	15	92	1.43e-12	78.2	60	hypothetical protein ES332_A01G054600v1 [Gossypium tomentosum]
Gosto.005G384700-1	TYH31663.1	55.135	185	72	4	676	1197	1	185	7.11e-54	194	69	hypothetical protein ES288_A01G190200v1 [Gossypium darwinii]
Gosto.005G384700-1	TYH31663.1	56.906	181	69	3	1441	1956	1	181	3.02e-47	176	69	hypothetical protein ES288_A01G190200v1 [Gossypium darwinii]
Gosto.005G384700-1	TYH31663.1	56.79	81	32	1	400	633	15	95	1.46e-17	92.8	69	hypothetical protein ES288_A01G190200v1 [Gossypium darwinii]
Gosto.005G384700-1	TYH31663.1	55.405	74	30	1	1186	1398	22	95	1.59e-13	81.3	69	hypothetical protein ES288_A01G190200v1 [Gossypium darwinii]
Gosto.005G384700-1	MBA0680957.1	54.098	183	71	4	676	1197	1	179	8.59e-54	193	49	hypothetical protein [Gossypium aridum]
Gosto.005G384700-1	MBA0680957.1	54.144	181	68	4	1441	1956	1	175	1.83e-44	168	49	hypothetical protein [Gossypium aridum]
Gosto.005G384700-1	TYJ50042.1	54.595	185	73	4	676	1197	1	185	8.65e-54	194	69	hypothetical protein E1A91_A01G178600v1 [Gossypium mustelinum]
Gosto.005G384700-1	TYJ50042.1	56.354	181	70	3	1441	1956	1	181	4.09e-47	176	69	hypothetical protein E1A91_A01G178600v1 [Gossypium mustelinum]
Gosto.005G384700-1	TYJ50042.1	55.556	81	33	1	400	633	15	95	4.81e-17	91.3	69	hypothetical protein E1A91_A01G178600v1 [Gossypium mustelinum]
Gosto.005G384700-1	TYJ50042.1	54.054	74	31	1	1186	1398	22	95	5.23e-13	79.7	69	hypothetical protein E1A91_A01G178600v1 [Gossypium mustelinum]
Gosto.005G384700-1	MBA0606291.1	58.152	184	66	6	676	1197	1	183	8.81e-54	194	67	hypothetical protein [Gossypium davidsonii]
Gosto.005G384700-1	MBA0606291.1	59.639	166	55	5	1492	1962	19	181	5.72e-48	178	67	hypothetical protein [Gossypium davidsonii]
Gosto.005G384700-1	MBA0606291.1	53.086	81	32	2	400	633	16	93	1.53e-14	84	67	hypothetical protein [Gossypium davidsonii]
Gosto.005G384700-1	MBA0606291.1	54.054	74	28	2	1186	1398	23	93	3.78e-12	77	67	hypothetical protein [Gossypium davidsonii]
Gosto.005G384700-1	MBA0854340.1	55.307	179	67	4	676	1185	1	175	1.14e-53	193	48	hypothetical protein [Gossypium schwendimanii]
Gosto.005G384700-1	MBA0854340.1	54.696	181	67	4	1441	1956	1	175	6.48e-45	169	48	hypothetical protein [Gossypium schwendimanii]
Gosto.005G384700-1	MBA0734468.1	55.676	185	71	4	676	1197	1	185	1.29e-53	193	69	hypothetical protein [Gossypium gossypioides]
Gosto.005G384700-1	MBA0734468.1	56.906	181	69	3	1441	1956	1	181	3.39e-46	173	69	hypothetical protein [Gossypium gossypioides]
Gosto.005G384700-1	MBA0734468.1	54.321	81	34	1	400	633	15	95	3.83e-15	85.9	69	hypothetical protein [Gossypium gossypioides]
Gosto.005G384700-1	MBA0734468.1	52.703	74	32	1	1186	1398	22	95	4.51e-11	73.9	69	hypothetical protein [Gossypium gossypioides]
Gosto.005G384700-1	KAA3465624.1	55.676	185	71	4	676	1197	1	185	1.56e-53	193	69	dirigent protein 4-like [Gossypium australe]
Gosto.005G384700-1	KAA3465624.1	57.459	181	68	3	1441	1956	1	181	2.11e-48	179	69	dirigent protein 4-like [Gossypium australe]
Gosto.005G384700-1	KAA3465624.1	56.79	81	32	1	400	633	15	95	3.54e-17	91.7	69	dirigent protein 4-like [Gossypium australe]
Gosto.005G384700-1	KAA3465624.1	55.405	74	30	1	1186	1398	22	95	3.63e-13	80.1	69	dirigent protein 4-like [Gossypium australe]
Gosto.005G384700-1	XP_016707220.1	55.135	185	72	4	676	1197	1	185	2.1e-53	192	69	PREDICTED: dirigent protein 4-like [Gossypium hirsutum]
Gosto.005G384700-1	XP_016707220.1	56.906	181	69	3	1441	1956	1	181	4.35e-47	176	69	PREDICTED: dirigent protein 4-like [Gossypium hirsutum]
Gosto.005G384700-1	XP_016707220.1	57.143	77	30	1	412	633	19	95	4.15e-16	88.6	69	PREDICTED: dirigent protein 4-like [Gossypium hirsutum]
Gosto.005G384700-1	XP_016707220.1	54.054	74	31	1	1186	1398	22	95	2.4e-12	77.8	69	PREDICTED: dirigent protein 4-like [Gossypium hirsutum]
Gosto.005G384700-1	XP_016729172.1	54.098	183	71	4	676	1197	1	179	1.14e-52	190	49	PREDICTED: dirigent protein 4-like [Gossypium hirsutum]
Gosto.005G384700-1	XP_016729172.1	54.696	181	67	4	1441	1956	1	175	4.22e-45	170	49	PREDICTED: dirigent protein 4-like [Gossypium hirsutum]
Gosto.005G384700-1	MBA0702130.1	81.452	124	23	0	1585	1956	2	125	2.65e-52	187	35	hypothetical protein [Gossypium aridum]
Gosto.005G384700-1	MBA0702130.1	74.219	128	31	1	820	1197	2	129	4.39e-49	179	35	hypothetical protein [Gossypium aridum]
Gosto.005G384700-1	PPD77869.1	65	160	47	3	1504	1956	571	730	3.41e-52	204	69	hypothetical protein GOBAR_DD25206 [Gossypium barbadense]
Gosto.005G384700-1	PPD77869.1	39.172	314	151	10	376	1197	421	734	7.5e-47	189	69	hypothetical protein GOBAR_DD25206 [Gossypium barbadense]
Gosto.005G384700-1	PPD77869.1	62.025	79	27	1	1171	1398	566	644	3.63e-17	98.6	69	hypothetical protein GOBAR_DD25206 [Gossypium barbadense]
Gosto.005G384700-1	MBA0672582.1	53.073	179	71	4	676	1185	1	175	2.35e-51	187	59	hypothetical protein [Gossypium klotzschianum]
Gosto.005G384700-1	MBA0672582.1	53.039	181	70	4	1441	1956	1	175	4.71e-43	164	59	hypothetical protein [Gossypium klotzschianum]
Gosto.005G384700-1	MBA0672582.1	48.148	81	33	2	400	633	15	89	4.91e-11	73.9	59	hypothetical protein [Gossypium klotzschianum]
Gosto.005G384700-1	MBA0879830.1	70.073	137	11	1	676	1086	1	107	3.69e-51	184	39	hypothetical protein [Gossypium schwendimanii]
Gosto.005G384700-1	MBA0879830.1	65.468	139	16	1	1441	1857	1	107	7.9e-39	150	39	hypothetical protein [Gossypium schwendimanii]
Gosto.005G384700-1	MBA0881524.1	67.153	137	15	1	676	1086	1	107	5.45e-51	183	39	hypothetical protein [Gossypium schwendimanii]
Gosto.005G384700-1	MBA0881524.1	68.345	139	12	1	1441	1857	1	107	1.84e-41	157	39	hypothetical protein [Gossypium schwendimanii]
Gosto.005G384700-1	XP_016670296.1	68.382	136	37	3	676	1065	1	136	9.01e-51	184	58	PREDICTED: dirigent protein 4-like [Gossypium hirsutum]
Gosto.005G384700-1	XP_016670296.1	69.853	136	37	2	1441	1836	1	136	6.37e-42	159	58	PREDICTED: dirigent protein 4-like [Gossypium hirsutum]
Gosto.005G384700-1	XP_016670296.1	60.241	83	30	1	394	633	13	95	2.45e-21	102	58	PREDICTED: dirigent protein 4-like [Gossypium hirsutum]
Gosto.005G384700-1	XP_016670296.1	63.514	74	24	1	1186	1398	22	95	7.03e-19	95.1	58	PREDICTED: dirigent protein 4-like [Gossypium hirsutum]
Gosto.005G384700-1	MBA0864414.1	68.116	138	13	2	676	1086	1	108	1.04e-48	177	39	hypothetical protein [Gossypium schwendimanii]
Gosto.005G384700-1	MBA0864414.1	64.286	140	17	2	1441	1857	1	108	7.97e-35	139	39	hypothetical protein [Gossypium schwendimanii]
Gosto.005G384700-1	MBA0581078.1	57.927	164	60	3	1492	1956	7	170	1.25e-48	179	65	hypothetical protein [Gossypium raimondii]
Gosto.005G384700-1	MBA0581078.1	54.598	174	68	4	709	1197	1	174	3.05e-48	178	65	hypothetical protein [Gossypium raimondii]
Gosto.005G384700-1	MBA0581078.1	58.025	81	31	1	400	633	4	84	3.04e-18	94.4	65	hypothetical protein [Gossypium raimondii]
Gosto.005G384700-1	MBA0581078.1	56.757	74	29	1	1186	1398	11	84	2.98e-14	82.8	65	hypothetical protein [Gossypium raimondii]
Gosto.005G384700-1	XP_012441935.1	80.952	105	20	0	1573	1887	1	105	1.6e-48	177	36	PREDICTED: dirigent protein 4-like [Gossypium raimondii]
Gosto.005G384700-1	XP_012441935.1	77.143	105	22	1	808	1116	1	105	7.77e-43	162	36	PREDICTED: dirigent protein 4-like [Gossypium raimondii]
Gosto.005G384700-1	XP_012441935.1	77.083	48	11	0	490	633	1	48	2.18e-13	79	36	PREDICTED: dirigent protein 4-like [Gossypium raimondii]
Gosto.005G384700-1	KAE8690664.1	54.375	160	63	4	676	1125	1	160	1.87e-47	176	64	dirigent protein 23-like [Hibiscus syriacus]
Gosto.005G384700-1	KAE8690664.1	55.944	143	52	4	1495	1896	20	160	1.27e-38	152	64	dirigent protein 23-like [Hibiscus syriacus]
Gosto.005G384700-1	KAE8690664.1	49.367	79	35	2	406	633	18	94	1.6e-12	77.8	64	dirigent protein 23-like [Hibiscus syriacus]
Gosto.005G384700-1	KAE8690664.1	43.299	97	48	3	1117	1398	2	94	1.58e-11	74.7	64	dirigent protein 23-like [Hibiscus syriacus]
Gosto.005G384700-1	MBA0797086.1	54.601	163	61	4	676	1137	1	159	3.1e-46	172	55	hypothetical protein [Gossypium harknessii]
Gosto.005G384700-1	MBA0797086.1	53.939	165	61	4	1441	1908	1	159	2.97e-37	147	55	hypothetical protein [Gossypium harknessii]
Gosto.005G384700-1	MBA0797086.1	48.148	81	33	2	400	633	15	89	5.63e-11	73.2	55	hypothetical protein [Gossypium harknessii]
Gosto.005G384700-1	MBA0637352.1	63.704	135	15	1	676	1080	1	101	1.27e-45	168	38	hypothetical protein [Gossypium davidsonii]
Gosto.005G384700-1	MBA0637352.1	64.964	137	12	1	1441	1851	1	101	5.39e-37	144	38	hypothetical protein [Gossypium davidsonii]
Gosto.005G384700-1	MBA0759017.1	53.333	180	72	5	694	1197	4	183	5.28e-45	170	69	hypothetical protein [Gossypium trilobum]
Gosto.005G384700-1	MBA0759017.1	53.939	165	66	4	1492	1956	15	179	2.19e-41	160	69	hypothetical protein [Gossypium trilobum]
Gosto.005G384700-1	MBA0759017.1	45.283	106	55	1	394	702	10	115	1.98e-17	92.4	69	hypothetical protein [Gossypium trilobum]
Gosto.005G384700-1	MBA0759017.1	50	74	34	1	1186	1398	19	92	2.97e-12	77.4	69	hypothetical protein [Gossypium trilobum]
Gosto.005G384700-1	MBA0606340.1	53.333	180	72	5	694	1197	4	183	7.16e-45	169	69	hypothetical protein [Gossypium davidsonii]
Gosto.005G384700-1	MBA0606340.1	53.939	165	66	4	1492	1956	15	179	2.88e-41	159	69	hypothetical protein [Gossypium davidsonii]
Gosto.005G384700-1	MBA0606340.1	45.283	106	55	1	394	702	10	115	2.43e-17	92	69	hypothetical protein [Gossypium davidsonii]
Gosto.005G384700-1	MBA0606340.1	50	74	34	1	1186	1398	19	92	3.5e-12	77	69	hypothetical protein [Gossypium davidsonii]
Gosto.005G384700-1	XP_012466182.1	52.778	180	73	5	694	1197	4	183	2.95e-44	167	69	PREDICTED: dirigent protein 4-like [Gossypium raimondii]
Gosto.005G384700-1	XP_012466182.1	53.333	165	67	4	1492	1956	15	179	1.39e-40	157	69	PREDICTED: dirigent protein 4-like [Gossypium raimondii]
Gosto.005G384700-1	XP_012466182.1	44.34	106	56	1	394	702	10	115	5.19e-17	91.3	69	PREDICTED: dirigent protein 4-like [Gossypium raimondii]
Gosto.005G384700-1	XP_012466182.1	48.649	74	35	1	1186	1398	19	92	7.84e-12	76.3	69	PREDICTED: dirigent protein 4-like [Gossypium raimondii]
Gosto.005G384700-1	XP_016709148.1	52.778	180	73	5	694	1197	4	183	3.27e-44	167	69	PREDICTED: dirigent protein 4-like [Gossypium hirsutum]
Gosto.005G384700-1	XP_016709148.1	54.545	165	65	4	1492	1956	15	179	9.72e-42	160	69	PREDICTED: dirigent protein 4-like [Gossypium hirsutum]
Gosto.005G384700-1	XP_016709148.1	46.226	106	54	1	394	702	10	115	1.05e-17	93.2	69	PREDICTED: dirigent protein 4-like [Gossypium hirsutum]
Gosto.005G384700-1	XP_016709148.1	51.351	74	33	1	1186	1398	19	92	1.13e-12	78.6	69	PREDICTED: dirigent protein 4-like [Gossypium hirsutum]
Gosto.005G384700-1	KAB2043851.1	52.778	180	73	5	694	1197	4	183	4.12e-44	167	69	hypothetical protein ES319_D01G048300v1 [Gossypium barbadense]
Gosto.005G384700-1	KAB2043851.1	54.545	165	65	4	1492	1956	15	179	1.15e-41	160	69	hypothetical protein ES319_D01G048300v1 [Gossypium barbadense]
Gosto.005G384700-1	KAB2043851.1	46.226	106	54	1	394	702	10	115	1.12e-17	93.2	69	hypothetical protein ES319_D01G048300v1 [Gossypium barbadense]
Gosto.005G384700-1	KAB2043851.1	51.351	74	33	1	1186	1398	19	92	1.13e-12	78.6	69	hypothetical protein ES319_D01G048300v1 [Gossypium barbadense]
Gosto.005G384700-1	XP_017604398.1	79.412	102	19	1	676	975	1	102	4.81e-44	164	53	PREDICTED: dirigent protein 4-like [Gossypium arboreum]
Gosto.005G384700-1	XP_017604398.1	80.198	101	20	0	1441	1743	1	101	7.14e-36	141	53	PREDICTED: dirigent protein 4-like [Gossypium arboreum]
Gosto.005G384700-1	XP_017604398.1	73.75	80	21	0	394	633	13	92	3.4e-28	120	53	PREDICTED: dirigent protein 4-like [Gossypium arboreum]
Gosto.005G384700-1	XP_017604398.1	60.638	94	34	1	1117	1398	2	92	2.35e-24	109	53	PREDICTED: dirigent protein 4-like [Gossypium arboreum]
Gosto.005G384700-1	MBA0878012.1	52.778	180	73	5	694	1197	4	183	7.71e-44	166	69	hypothetical protein [Gossypium schwendimanii]
Gosto.005G384700-1	MBA0878012.1	53.939	165	66	4	1492	1956	15	179	1.21e-40	158	69	hypothetical protein [Gossypium schwendimanii]
Gosto.005G384700-1	MBA0878012.1	45.283	106	55	1	394	702	10	115	8.4e-17	90.5	69	hypothetical protein [Gossypium schwendimanii]
Gosto.005G384700-1	MBA0878012.1	50	74	34	1	1186	1398	19	92	1.05e-11	75.9	69	hypothetical protein [Gossypium schwendimanii]
Gosto.005G384700-1	MBA0576149.1	51.667	180	75	4	694	1197	4	183	9.15e-44	166	69	hypothetical protein [Gossypium lobatum]
Gosto.005G384700-1	MBA0576149.1	53.333	165	67	4	1492	1956	15	179	2.51e-40	157	69	hypothetical protein [Gossypium lobatum]
Gosto.005G384700-1	MBA0576149.1	44.34	106	56	1	394	702	10	115	2.29e-16	89.4	69	hypothetical protein [Gossypium lobatum]
Gosto.005G384700-1	MBA0576149.1	50	74	34	1	1186	1398	19	92	9.96e-12	75.9	69	hypothetical protein [Gossypium lobatum]
Gosto.005G384700-1	XP_012469058.1	52.222	180	74	5	694	1197	4	183	2.12e-43	165	69	PREDICTED: dirigent protein 4-like [Gossypium raimondii]
Gosto.005G384700-1	XP_012469058.1	53.939	165	66	4	1492	1956	15	179	5.92e-41	159	69	PREDICTED: dirigent protein 4-like [Gossypium raimondii]
Gosto.005G384700-1	XP_012469058.1	45.283	106	55	1	394	702	10	115	4.9e-17	91.3	69	PREDICTED: dirigent protein 4-like [Gossypium raimondii]
Gosto.005G384700-1	XP_012469058.1	50	74	34	1	1186	1398	19	92	5.6e-12	76.6	69	PREDICTED: dirigent protein 4-like [Gossypium raimondii]
Gosto.005G384700-1	XP_016722627.1	51.111	180	76	5	694	1197	4	183	2.86e-43	165	69	PREDICTED: dirigent protein 4-like [Gossypium hirsutum]
Gosto.005G384700-1	XP_016722627.1	52.727	165	68	4	1492	1956	15	179	8.76e-41	158	69	PREDICTED: dirigent protein 4-like [Gossypium hirsutum]
Gosto.005G384700-1	XP_016722627.1	45.283	106	55	1	394	702	10	115	5.89e-18	94	69	PREDICTED: dirigent protein 4-like [Gossypium hirsutum]
Gosto.005G384700-1	XP_016722627.1	50	74	34	1	1186	1398	19	92	9.87e-13	79	69	PREDICTED: dirigent protein 4-like [Gossypium hirsutum]
Gosto.005G384700-1	KAB2097509.1	48.925	186	83	4	676	1197	1	186	4.29e-43	164	60	hypothetical protein ES319_A01G175100v1 [Gossypium barbadense]
Gosto.005G384700-1	KAB2097509.1	50.303	165	72	3	1492	1956	18	182	2.88e-39	154	60	hypothetical protein ES319_A01G175100v1 [Gossypium barbadense]
Gosto.005G384700-1	KAB2097509.1	42.453	106	58	1	394	702	13	118	9.54e-16	87.4	60	hypothetical protein ES319_A01G175100v1 [Gossypium barbadense]
Gosto.005G384700-1	TYI43851.1	48.925	186	83	4	676	1197	1	186	6.24e-43	164	60	hypothetical protein ES332_A01G196600v1 [Gossypium tomentosum]
Gosto.005G384700-1	TYI43851.1	49.697	165	73	3	1492	1956	18	182	1.17e-38	152	60	hypothetical protein ES332_A01G196600v1 [Gossypium tomentosum]
Gosto.005G384700-1	TYI43851.1	41.509	106	59	1	394	702	13	118	3.59e-15	85.9	60	hypothetical protein ES332_A01G196600v1 [Gossypium tomentosum]
Gosto.005G384700-1	MBA0624417.1	84.444	90	14	0	1687	1956	1	90	8.69e-43	160	26	hypothetical protein [Gossypium davidsonii]
Gosto.005G384700-1	MBA0624417.1	80.851	94	18	0	916	1197	1	94	1.47e-41	157	26	hypothetical protein [Gossypium davidsonii]
Gosto.005G384700-1	XP_017622225.1	48.387	186	84	4	676	1197	1	186	1.13e-42	163	60	PREDICTED: dirigent protein 4-like [Gossypium arboreum]
Gosto.005G384700-1	XP_017622225.1	50.303	165	72	3	1492	1956	18	182	1.23e-39	155	60	PREDICTED: dirigent protein 4-like [Gossypium arboreum]
Gosto.005G384700-1	XP_017622225.1	42.453	106	58	1	394	702	13	118	5.41e-16	88.2	60	PREDICTED: dirigent protein 4-like [Gossypium arboreum]
Gosto.005G384700-1	XP_016702300.1	48.387	186	84	4	676	1197	1	186	1.45e-42	163	60	PREDICTED: dirigent protein 4-like [Gossypium hirsutum]
Gosto.005G384700-1	XP_016702300.1	50.303	165	72	3	1492	1956	18	182	1.54e-39	155	60	PREDICTED: dirigent protein 4-like [Gossypium hirsutum]
Gosto.005G384700-1	XP_016702300.1	42.453	106	58	1	394	702	13	118	5.57e-16	88.2	60	PREDICTED: dirigent protein 4-like [Gossypium hirsutum]
Gosto.005G384700-1	TYJ48278.1	50.556	180	77	5	694	1197	4	183	1.54e-42	163	69	hypothetical protein E1A91_A01G050900v1 [Gossypium mustelinum]
Gosto.005G384700-1	TYJ48278.1	52.727	165	68	4	1492	1956	15	179	7.46e-41	158	69	hypothetical protein E1A91_A01G050900v1 [Gossypium mustelinum]
Gosto.005G384700-1	TYJ48278.1	45.283	106	55	1	394	702	10	115	5.78e-18	94	69	hypothetical protein E1A91_A01G050900v1 [Gossypium mustelinum]
Gosto.005G384700-1	TYJ48278.1	50	74	34	1	1186	1398	19	92	9.87e-13	79	69	hypothetical protein E1A91_A01G050900v1 [Gossypium mustelinum]
Gosto.005G384700-1	XP_007041907.2	47.895	190	78	5	661	1197	7	186	1.71e-42	163	46	PREDICTED: dirigent protein 4 [Theobroma cacao]
Gosto.005G384700-1	XP_007041907.2	52.866	157	65	3	1519	1962	28	184	1.28e-40	158	46	PREDICTED: dirigent protein 4 [Theobroma cacao]
Gosto.005G384700-1	MBA0753337.1	49.462	186	82	4	676	1197	1	186	2.07e-42	163	60	hypothetical protein [Gossypium gossypioides]
Gosto.005G384700-1	MBA0753337.1	51.515	165	70	3	1492	1956	18	182	8.77e-41	158	60	hypothetical protein [Gossypium gossypioides]
Gosto.005G384700-1	MBA0753337.1	43.396	106	57	1	394	702	13	118	2.3e-16	89.4	60	hypothetical protein [Gossypium gossypioides]
Gosto.005G384700-1	XP_021286759.1	48.421	190	77	5	661	1197	7	186	3.63e-42	162	46	dirigent protein 4-like [Herrania umbratica]
Gosto.005G384700-1	XP_021286759.1	52.229	157	66	3	1519	1962	28	184	1.76e-38	152	46	dirigent protein 4-like [Herrania umbratica]
Gosto.005G384700-1	XP_022762285.1	52.795	161	65	4	676	1125	1	161	4.55e-42	161	60	dirigent protein 4-like [Durio zibethinus]
Gosto.005G384700-1	XP_022762285.1	55.147	136	52	3	1492	1872	18	153	1.67e-35	142	60	dirigent protein 4-like [Durio zibethinus]
Gosto.005G384700-1	XP_022762285.1	53.012	83	36	1	394	633	13	95	8.09e-16	87	60	dirigent protein 4-like [Durio zibethinus]
Gosto.005G384700-1	XP_022762285.1	54.054	74	31	1	1186	1398	22	95	3.6e-13	79.3	60	dirigent protein 4-like [Durio zibethinus]
Gosto.005G384700-1	MBA0791911.1	53.939	165	66	4	1492	1956	1	165	1.14e-41	160	67	hypothetical protein [Gossypium harknessii]
Gosto.005G384700-1	MBA0791911.1	52.663	169	68	5	727	1197	1	169	1.52e-40	157	67	hypothetical protein [Gossypium harknessii]
Gosto.005G384700-1	MBA0791911.1	45	100	52	1	412	702	2	101	3.41e-17	91.3	67	hypothetical protein [Gossypium harknessii]
Gosto.005G384700-1	MBA0791911.1	50	74	34	1	1186	1398	5	78	1.27e-12	78.2	67	hypothetical protein [Gossypium harknessii]
Gosto.005G384700-1	OMO92810.1	46.196	184	87	5	676	1197	1	182	1.33e-41	160	45	Plant disease resistance response protein [Corchorus olitorius]
Gosto.005G384700-1	OMO92810.1	50.633	158	65	5	1510	1956	25	178	5.54e-37	147	45	Plant disease resistance response protein [Corchorus olitorius]
Gosto.005G384700-1	KAE8698721.1	49.733	187	77	7	676	1197	1	183	1.78e-41	160	47	Disease resistance-responsive family protein [Hibiscus syriacus]
Gosto.005G384700-1	KAE8698721.1	49.711	173	72	6	1492	1974	17	186	3.77e-35	142	47	Disease resistance-responsive family protein [Hibiscus syriacus]
Gosto.005G384700-1	OMO92811.1	37.846	325	136	12	400	1197	45	362	1.83e-41	166	69	Plant disease resistance response protein [Corchorus olitorius]
Gosto.005G384700-1	OMO92811.1	40.625	256	123	8	676	1398	31	272	8.17e-39	158	69	Plant disease resistance response protein [Corchorus olitorius]
Gosto.005G384700-1	OMO92811.1	51.829	164	63	5	1492	1956	202	358	1.2e-31	138	69	Plant disease resistance response protein [Corchorus olitorius]
Gosto.005G384700-1	OMO92811.1	46.053	152	69	5	1498	1920	50	199	7.41e-26	121	69	Plant disease resistance response protein [Corchorus olitorius]
Gosto.005G384700-1	MBA0567463.1	86.207	87	12	0	700	960	1	87	3.67e-41	155	45	hypothetical protein [Gossypium lobatum]
Gosto.005G384700-1	MBA0567463.1	80	80	14	1	1492	1731	10	87	7.85e-32	129	45	hypothetical protein [Gossypium lobatum]
Gosto.005G384700-1	MBA0567463.1	77.465	71	14	1	1186	1398	14	82	1.02e-25	112	45	hypothetical protein [Gossypium lobatum]
Gosto.005G384700-1	MBA0567463.1	70.513	78	21	1	400	633	7	82	3.05e-24	108	45	hypothetical protein [Gossypium lobatum]
Gosto.005G384700-1	EOX97738.1	47.368	190	79	5	661	1197	7	186	5.64e-41	159	46	Disease resistance-responsive family protein [Theobroma cacao]
Gosto.005G384700-1	EOX97738.1	51.592	157	67	3	1519	1962	28	184	7.75e-39	153	46	Disease resistance-responsive family protein [Theobroma cacao]
Gosto.005G384700-1	XP_016707239.1	46.237	186	88	5	676	1197	1	186	6.05e-41	159	46	PREDICTED: dirigent protein 4-like [Gossypium hirsutum]
Gosto.005G384700-1	XP_016707239.1	46.707	167	77	5	1498	1965	20	185	2.46e-34	140	46	PREDICTED: dirigent protein 4-like [Gossypium hirsutum]
Gosto.005G384700-1	MBA0625463.1	60	135	20	1	676	1080	1	101	7.02e-41	155	38	hypothetical protein [Gossypium davidsonii]
Gosto.005G384700-1	MBA0625463.1	61.314	137	17	1	1441	1851	1	101	5.43e-33	133	38	hypothetical protein [Gossypium davidsonii]
Gosto.005G384700-1	KAB2045818.1	46.237	186	88	5	676	1197	1	186	1.39e-40	157	46	hypothetical protein ES319_D01G188200v1 [Gossypium barbadense]
Gosto.005G384700-1	KAB2045818.1	48.171	164	73	5	1498	1956	20	182	2.69e-34	140	46	hypothetical protein ES319_D01G188200v1 [Gossypium barbadense]
Gosto.005G384700-1	MBA0734466.1	46.237	186	88	5	676	1197	1	186	1.42e-40	157	46	hypothetical protein [Gossypium gossypioides]
Gosto.005G384700-1	MBA0734466.1	48.78	164	72	5	1498	1956	20	182	7.69e-35	142	46	hypothetical protein [Gossypium gossypioides]
Gosto.005G384700-1	XP_012469141.1	46.237	186	88	5	676	1197	1	186	1.48e-40	157	46	PREDICTED: dirigent protein 4-like [Gossypium raimondii]
Gosto.005G384700-1	XP_012469141.1	48.78	164	72	5	1498	1956	20	182	1.69e-34	140	46	PREDICTED: dirigent protein 4-like [Gossypium raimondii]
Gosto.005G384700-1	EOX97739.1	46.995	183	83	4	676	1197	1	178	2.09e-40	157	46	Disease resistance-responsive family protein [Theobroma cacao]
Gosto.005G384700-1	EOX97739.1	47.273	165	71	4	1495	1962	19	176	8.72e-33	135	46	Disease resistance-responsive family protein [Theobroma cacao]
Gosto.005G384700-1	XP_007041908.2	46.995	183	83	4	676	1197	1	178	2.29e-40	157	46	PREDICTED: dirigent protein 4 [Theobroma cacao]
Gosto.005G384700-1	XP_007041908.2	47.273	165	71	4	1495	1962	19	176	9.24e-33	135	46	PREDICTED: dirigent protein 4 [Theobroma cacao]
Gosto.005G384700-1	MBA0706434.1	46.237	186	88	5	676	1197	1	186	2.69e-40	157	46	hypothetical protein [Gossypium laxum]
Gosto.005G384700-1	MBA0706434.1	48.78	164	72	5	1498	1956	20	182	1.35e-34	141	46	hypothetical protein [Gossypium laxum]
Gosto.005G384700-1	TYI98168.1	45.699	186	89	5	676	1197	1	186	4.14e-40	156	46	hypothetical protein E1A91_D01G194400v1 [Gossypium mustelinum]
Gosto.005G384700-1	TYI98168.1	48.171	164	73	5	1498	1956	20	182	2.15e-34	140	46	hypothetical protein E1A91_D01G194400v1 [Gossypium mustelinum]
Gosto.005G384700-1	TYG83865.1	45.699	186	89	5	676	1197	1	186	4.31e-40	156	46	hypothetical protein ES288_D01G202600v1 [Gossypium darwinii]
Gosto.005G384700-1	TYG83865.1	48.171	164	73	5	1498	1956	20	182	2.1e-34	140	46	hypothetical protein ES288_D01G202600v1 [Gossypium darwinii]
Gosto.005G384700-1	MBA0760197.1	46.237	186	88	5	676	1197	1	186	6.5e-40	156	46	hypothetical protein [Gossypium trilobum]
Gosto.005G384700-1	MBA0760197.1	49.39	164	71	5	1498	1956	20	182	5.95e-35	142	46	hypothetical protein [Gossypium trilobum]
Gosto.005G384700-1	MBA0677024.1	46.703	182	85	5	676	1185	1	182	9.04e-40	155	45	hypothetical protein [Gossypium aridum]
Gosto.005G384700-1	MBA0677024.1	48.78	164	72	5	1498	1956	20	182	1.28e-34	141	45	hypothetical protein [Gossypium aridum]
Gosto.005G384700-1	XP_007041913.2	45.304	181	87	5	691	1197	6	186	1.02e-39	155	57	PREDICTED: dirigent protein 4 [Theobroma cacao]
Gosto.005G384700-1	XP_007041913.2	49.39	164	71	5	1498	1956	20	182	4.46e-37	148	57	PREDICTED: dirigent protein 4 [Theobroma cacao]
Gosto.005G384700-1	XP_007041913.2	46.988	83	40	2	394	633	13	94	5.55e-12	76.6	57	PREDICTED: dirigent protein 4 [Theobroma cacao]
Gosto.005G384700-1	EOX97744.1	45.304	181	87	5	691	1197	6	186	1.28e-39	155	57	Disease resistance-responsive family protein [Theobroma cacao]
Gosto.005G384700-1	EOX97744.1	49.39	164	71	5	1498	1956	20	182	6.9e-37	147	57	Disease resistance-responsive family protein [Theobroma cacao]
Gosto.005G384700-1	EOX97744.1	46.988	83	40	2	394	633	13	94	6.92e-12	76.3	57	Disease resistance-responsive family protein [Theobroma cacao]
Gosto.005G384700-1	XP_021286988.1	46.995	183	83	4	676	1197	1	178	2.03e-39	154	46	dirigent protein 4-like [Herrania umbratica]
Gosto.005G384700-1	XP_021286988.1	47.273	165	71	4	1495	1962	19	176	9.38e-32	133	46	dirigent protein 4-like [Herrania umbratica]
Gosto.005G384700-1	MBA0624418.1	58.519	135	22	1	676	1080	1	101	3.17e-39	150	48	hypothetical protein [Gossypium davidsonii]
Gosto.005G384700-1	MBA0624418.1	59.124	137	20	1	1441	1851	1	101	1.86e-30	126	48	hypothetical protein [Gossypium davidsonii]
Gosto.005G384700-1	MBA0624418.1	52.778	72	33	1	1186	1401	22	92	8.99e-11	70.5	48	hypothetical protein [Gossypium davidsonii]
Gosto.005G384700-1	TYH88678.1	45.161	186	90	5	676	1197	1	186	3.25e-39	154	46	hypothetical protein ES332_D01G204500v1 [Gossypium tomentosum]
Gosto.005G384700-1	TYH88678.1	46.108	167	78	5	1498	1965	20	185	4.24e-33	137	46	hypothetical protein ES332_D01G204500v1 [Gossypium tomentosum]
Gosto.005G384700-1	MBA0551029.1	47.312	186	86	4	676	1197	1	186	5.98e-39	153	60	hypothetical protein [Gossypium lobatum]
Gosto.005G384700-1	MBA0551029.1	48.485	165	75	3	1492	1956	18	182	3.25e-35	143	60	hypothetical protein [Gossypium lobatum]
Gosto.005G384700-1	MBA0551029.1	41.509	106	59	1	394	702	13	118	5.61e-14	82.4	60	hypothetical protein [Gossypium lobatum]
Gosto.005G384700-1	XP_021286899.1	46.328	177	83	5	691	1185	6	182	7.83e-39	153	56	dirigent protein 4-like [Herrania umbratica]
Gosto.005G384700-1	XP_021286899.1	50	164	70	5	1498	1956	20	182	1.29e-37	149	56	dirigent protein 4-like [Herrania umbratica]
Gosto.005G384700-1	XP_021286899.1	46.988	83	40	2	394	633	13	94	7.51e-12	76.3	56	dirigent protein 4-like [Herrania umbratica]
Gosto.005G384700-1	MBA0642604.1	45.161	186	90	5	676	1197	1	186	8.06e-39	153	46	hypothetical protein [Gossypium klotzschianum]
Gosto.005G384700-1	MBA0642604.1	47.853	163	73	5	1498	1953	20	181	3.04e-33	137	46	hypothetical protein [Gossypium klotzschianum]
Gosto.005G384700-1	OMO92855.1	46.409	181	85	5	691	1197	6	186	8.14e-39	153	57	Plant disease resistance response protein [Corchorus olitorius]
Gosto.005G384700-1	OMO92855.1	50.602	166	70	5	1498	1962	20	184	2.96e-37	148	57	Plant disease resistance response protein [Corchorus olitorius]
Gosto.005G384700-1	OMO92855.1	48.148	81	38	2	394	627	13	92	3.52e-11	74.3	57	Plant disease resistance response protein [Corchorus olitorius]
Gosto.005G384700-1	MBA0607615.1	45.161	186	90	5	676	1197	1	186	8.56e-39	153	46	hypothetical protein [Gossypium davidsonii]
Gosto.005G384700-1	MBA0607615.1	47.853	163	73	5	1498	1953	20	181	3.22e-33	137	46	hypothetical protein [Gossypium davidsonii]
Gosto.005G384700-1	XP_006485326.1	45.503	189	88	6	676	1197	1	189	1.14e-38	152	46	dirigent protein 4-like [Citrus sinensis]
Gosto.005G384700-1	XP_006485326.1	49.697	165	72	4	1495	1956	21	185	3.7e-35	142	46	dirigent protein 4-like [Citrus sinensis]
Gosto.005G384700-1	XP_016702464.1	45.989	187	87	6	676	1197	1	186	1.38e-38	152	46	PREDICTED: dirigent protein 4-like [Gossypium hirsutum]
Gosto.005G384700-1	XP_016702464.1	48.78	164	72	5	1498	1956	20	182	8.61e-34	139	46	PREDICTED: dirigent protein 4-like [Gossypium hirsutum]
Gosto.005G384700-1	XP_006495208.1	45.503	189	88	6	676	1197	1	189	1.62e-38	152	46	dirigent protein 4-like [Citrus sinensis]
Gosto.005G384700-1	XP_006495208.1	49.697	165	72	4	1495	1956	21	185	4.97e-35	142	46	dirigent protein 4-like [Citrus sinensis]
Gosto.005G384700-1	MBA0793102.1	45.699	186	89	5	676	1197	1	186	1.86e-38	152	46	hypothetical protein [Gossypium harknessii]
Gosto.005G384700-1	MBA0793102.1	48.171	164	73	5	1498	1956	20	182	3.59e-33	137	46	hypothetical protein [Gossypium harknessii]
Gosto.005G384700-1	MBA0849995.1	45.604	182	87	5	676	1185	1	182	3.97e-38	151	45	hypothetical protein [Gossypium schwendimanii]
Gosto.005G384700-1	MBA0849995.1	46.951	164	75	5	1498	1956	20	182	2.86e-33	137	45	hypothetical protein [Gossypium schwendimanii]
Gosto.005G384700-1	XP_006495161.1	44.974	189	89	6	676	1197	1	189	4.22e-38	151	46	dirigent protein 4-like [Citrus sinensis]
Gosto.005G384700-1	XP_006495161.1	49.091	165	73	4	1495	1956	21	185	1.19e-34	141	46	dirigent protein 4-like [Citrus sinensis]
Gosto.005G384700-1	MBA0551026.1	45.604	182	87	5	676	1185	1	182	4.35e-38	150	45	hypothetical protein [Gossypium lobatum]
Gosto.005G384700-1	MBA0551026.1	46.951	164	75	5	1498	1956	20	182	3.22e-33	137	45	hypothetical protein [Gossypium lobatum]
Gosto.005G384700-1	GAY69532.1	45.946	185	85	6	676	1185	1	185	4.43e-38	150	46	hypothetical protein CUMW_288400, partial [Citrus unshiu]
Gosto.005G384700-1	GAY69532.1	49.697	165	72	4	1495	1956	21	185	5.08e-35	142	46	hypothetical protein CUMW_288400, partial [Citrus unshiu]
Gosto.005G384700-1	MBA0604269.1	43.617	188	92	5	676	1197	1	188	5.63e-38	150	46	hypothetical protein [Gossypium davidsonii]
Gosto.005G384700-1	MBA0604269.1	46.386	166	75	5	1498	1956	20	184	3.4e-31	131	46	hypothetical protein [Gossypium davidsonii]
Gosto.005G384700-1	KAB2097497.1	45.455	187	88	6	676	1197	1	186	8.73e-38	150	46	hypothetical protein ES319_A01G174600v1 [Gossypium barbadense]
Gosto.005G384700-1	KAB2097497.1	48.171	164	73	5	1498	1956	20	182	4.12e-33	137	46	hypothetical protein ES319_A01G174600v1 [Gossypium barbadense]
[truncated: 43,691 more rows]
